# Supplementary material for: One-step synthesis of cyanated pyrazolo[1,5-a]pyridines utilizing N-aminopyridines as a 1,3-dipole and a nitrogen source
Source: Royal Society of Chemistry journal article supplement (doi:10.1039/d3qo00417a), 2023-01-01
Supplement: d3qo00417a1.pdf [file d3qo00417a1.pdf]

Supporting Information for

**One-step Synthesis of Cyanated Pyrazolo[1, 5-*a*]pyridines Utilizing *N*-Aminopyridines as 1,3-Dipole and Nitrogen Source**

Xiaotian Shi, Yu Lin, Jiaohang Wei, Limin Zhao, Pengfeng Guo, Hua Cao\*, and Xiang Liu\*

*School of Chemistry and Chemical Engineerin, Guangdong Provincial Key Laboratory of Advanced Drug Delivery, and Guangdong Provincial Engineering Center of Topical Precise Drug Delivery System, Guangdong Pharmaceutical University, Zhongshan 528458, P. R. of China*

E-mail: liux96@gdpu.edu.cn; caohua@gdpu.edu.cn

**Table of Contents:**

---

|                                                      |     |
|------------------------------------------------------|-----|
| 1. General considerations                            | S2  |
| 2. Experimental procedures and characterization data | S3  |
| 2.1 <i>Experimental procedures</i>                   | S3  |
| 2.2 <i>Characterization data</i>                     | S6  |
| 3. NMR spectra for new compounds                     | S17 |
| 4. X-ray crystallographic data                       | S53 |
| 5. References                                        | S56 |

---

## 1. General considerations

Unless otherwise noted, commercial reagents were purchased from Adamas, Alfa, Aladdin, TCI, *J&K* or Macklin and used without further purification. All reactions were carried out using oven-dried glassware and all reactions proceeded without special care. Column chromatography was performed on 200-300 mesh silica gel (Huanghai, China).

$^1\text{H}$ ,  $^{19}\text{F}$  and  $^{13}\text{C}\{^1\text{H}\}$  NMR spectra were recorded on an Bruker Ascend 400 MHz spectrometer at ambient temperature.  $^1\text{H}$  NMR spectra are referred to the residual solvent signal ( $\delta = 7.26$  ppm) and  $^{13}\text{C}$  NMR spectra are referred to the residual solvent signal ( $\delta = 77.16$  ppm). Data for  $^1\text{H}$  NMR are reported as follows: chemical shifts ( $\delta$  ppm), multiplicities (s = singlet, d = doublet, t = triplet, q = quartet, m = multiplet, br = broad), coupling constants (Hz), integration.

The data of HRMS was carried out on a waters G2-XS high-resolution mass spectrometer (HR-ESI-MS), or Thermo Fisher Scientific LTQ FTICR-MS, or Agilent 7250 GC/QTOF. Melting point were recorded using a SGW X-4 Melting Point Apparatus. X-ray diffraction data were collected on SuperNova, Dual, Cu at zero, AtlasS2.

## 2. Experimental procedures and characterization data

### 2.1 Experimental procedures

The synthesis of compounds **1**, **5**, and **7** according to the following procedure:

The substrates **1**, **5**, and **7** are known and were prepared according to the procedures in the literature.<sup>1-3</sup> As exemplified for **1a**:

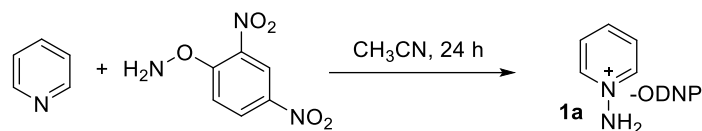

To a solution of pyridine (0.47 g, 6.0 mmol) in acetonitrile (25 mL) was added *O*-(2,4-dinitrophenyl)hydroxylamine (1.3 g, 6.6 mmol). The reaction flask was sealed with rubber plug, and the reaction mixture was stirred for 24 h at room temperature, then upon filtering off the solvent. The orange solid **1a** was obtained in 80% yield (1.33 g), which was carried out to the next step without further purification.

The synthesis of compounds **2** according to the following procedure:

The substrates **2** are known and were prepared according to the procedures in the literature.<sup>4</sup> As exemplified for **2a**:

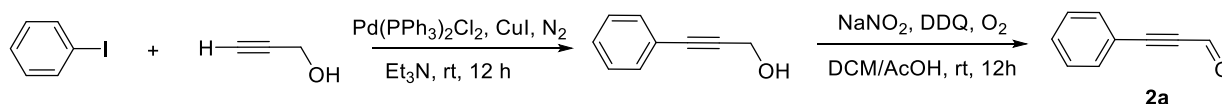

Step 1: To a mixture of iodobenzene (816 mg, 4 mmol) and prop-2-yn-1-ol (336 mg, 6 mmol), Pd(PPh<sub>3</sub>)<sub>2</sub>Cl<sub>2</sub> (140 mg, 5 mol %) and CuI (76 mg, 10 mol %) were added, followed by 8 mL Et<sub>3</sub>N, and the reaction was allowed to stir at room temperature under N<sub>2</sub> for 12 h. The solvent was removed, and the mixture was purified by column chromatography (eluted with petroleum ether/ethyl acetate = 4:1) to give 2-phenylethyn-1-ol (brown oil) in 87% yield (459.9 mg).

Step 2: To a solution of 2-phenylethyn-1-ol in 6 mL of mixed solvent (DCM/AcOH = 10:1), NaNO<sub>2</sub> (24 mg) and DDQ (79 mg) were added, and the mixture reacted at room temperature under O<sub>2</sub> for 12 h. The solvent was removed, and the mixture was purified by column chromatography (eluted with petroleum ether/ethyl acetate = 8:1) to give **2a** (brown oil) in 73% yield (330.4 mg).

The synthesis of products **3**, **4**, and **6** according to the following procedure:

The compounds **3a**, **3b**, **3e**, **3k**, **4a**, **4b**, **4d-4f**, **4h**, **4i**, **4m**, and **4n** were known compounds and their NMR data were in agreement with the literature.<sup>5</sup>

As exemplified for **3a**:

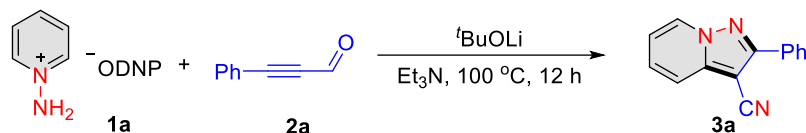

A pressure tube was charged with **1a** (166.8 mg, 0.60 mmol, 2.0 equiv), **2a** (39.0 mg, 0.30 mmol, 1.0 equiv), <sup>t</sup>BuOLi (24 mg, 0.30 mmol, 1.0 equiv), Et<sub>3</sub>N (3.0 mL). The mixtures were heated with a heating mantle at 100 °C for 12 h, then cooled to room temperature. The solution was concentrated in vacuo, and the residue was purified by flash column chromatography (petroleum ether: ethyl acetate = 7: 1) to give product **3a** in 85% yield (55.9 mg).

**The synthesis of products 7' according to the following procedure:**

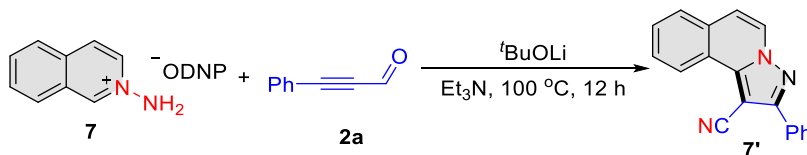

A pressure tube was charged with **7** (196.8 mg, 0.60 mmol, 2.0 equiv), **2a** (39.0 mg, 0.30 mmol, 1.0 equiv), <sup>t</sup>BuOLi (24 mg, 0.30 mmol, 1.0 equiv), Et<sub>3</sub>N (3.0 mL). The mixtures were heated with a heating mantle at 100 °C for 12 h, then cooled to room temperature. The solution was concentrated in vacuo, and the residue was purified by flash column chromatography (petroleum ether: ethyl acetate = 7: 1) to give product **7'** in 60% yield (48.4 mg).

**The synthesis of products 8 according to the following procedure:**

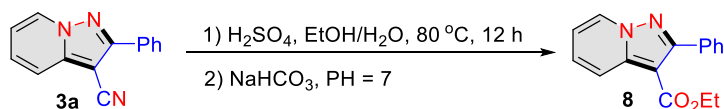

To a solution of 4N H<sub>2</sub>SO<sub>4</sub> (1 mL) and ethanol (2 mL) was added **3a** (65.7 mg, 0.30 mmol, 1.0 equiv). The reaction mixture was stirred at 80 °C for 12 h. The mixture was cooled to room temperature and alkalized by NaHCO<sub>3</sub> to PH = 7, and then extracted with 10 mL ethyl acetate. The organic layer was washed with brine and dried over Na<sub>2</sub>SO<sub>4</sub>, filtered and concentrated in vacuum. The residue was purified by flash column chromatography (petroleum ether: ethyl acetate = 7: 1) to give product **8** in

55% yield (43.9 mg). **8** were known compounds and its NMR data were in agreement with the literature.<sup>6</sup>

**The synthesis of products 9 according to the following procedure:**

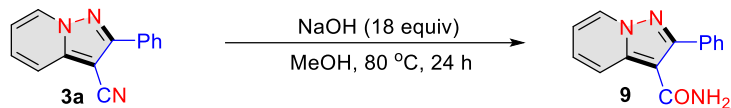

To a solution of NaOH (215.9 mg, 5.40 mmol, 18 equiv) and methanol (3 mL) was added **3a** (65.7 mg, 0.30 mmol, 1.0 equiv). The reaction mixture was stirred at 80 °C for 24 h. then cooled to room temperature. The solution was concentrated in vacuo, and the residue was purified by flash column chromatography (petroleum ether: ethyl acetate = 7: 1) to give product **9** in 45% yield (32.0 mg).

## 2.2 Characterization data

### 2-Phenylpyrazolo[1,5-*a*]pyridine-3-carbonitrile (**3a**)

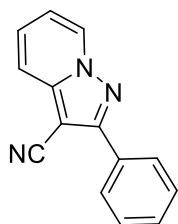

Flash column chromatography on silica gel (eluent: PE/EA = 7/1, v/v) to afford **3a**.

Yellow solid (55.9 mg, 85%), mp 121.2-123.1 °C. <sup>1</sup>H NMR (400 MHz, CDCl<sub>3</sub>) δ 8.56 (d, *J* = 6.9 Hz, 1H), 8.14 (d, *J* = 7.6 Hz, 2H), 7.77 (d, *J* = 9.0 Hz, 1H), 7.53 – 7.43 (m, 4H), 7.03 (t, *J* = 6.9 Hz, 1H). <sup>13</sup>C NMR (100 MHz, CDCl<sub>3</sub>) δ 156.0, 144.6, 130.5, 130.2, 129.6, 129.1, 127.9, 127.6, 117.1, 115.1, 114.7, 79.6. HRMS (GC/QTOF) *m/z*: [M]<sup>+</sup> calcd for

C<sub>14</sub>H<sub>9</sub>N<sub>3</sub>, 219.0796; found 219.0788.

### 7-Methyl-2-phenylpyrazolo[1,5-*a*]pyridine-3-carbonitrile (**3b**)

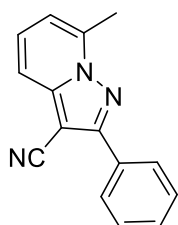

Flash column chromatography on silica gel (eluent: PE/EA = 7/1, v/v) to afford **3b**.

Yellow solid (58.0 mg, 83%), mp 130.1-131.2 °C. <sup>1</sup>H NMR (400 MHz, CDCl<sub>3</sub>) δ 8.18 (d, *J* = 6.7 Hz, 2H), 7.65 (d, *J* = 8.8 Hz, 1H), 7.54 – 7.45 (m, 3H), 7.38 (t, 1H), 6.86 (d, *J* = 7.0 Hz, 1H), 2.84 (s, 3H). <sup>13</sup>C NMR (100 MHz, CDCl<sub>3</sub>) δ 155.2, 145.0, 139.9, 130.9, 130.0, 129.0, 127.8, 127.6, 114.5, 114.0, 79.5, 17.9. HRMS (GC/QTOF) *m/z*: [M]<sup>+</sup> calcd

for C<sub>15</sub>H<sub>11</sub>N<sub>3</sub>, 233.0953; found 233.0943.

### 7-Ethyl-2-phenylpyrazolo[1,5-*a*]pyridine-3-carbonitrile (**3c**)

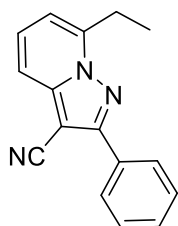

Flash column chromatography on silica gel (eluent: PE/EA = 7/1, v/v) to afford **3c**.

Yellow solid (59.3 mg, 80%), mp 132.8-133.4 °C. <sup>1</sup>H NMR (400 MHz, CDCl<sub>3</sub>) δ 8.18 (d, *J* = 7.9 Hz, 2H), 7.63 (d, *J* = 8.7 Hz, 1H), 7.54 – 7.44 (m, 3H), 7.40 (t, 1H), 6.85 (d, *J* = 7.1 Hz, 1H), 3.26 (q, *J* = 7.4 Hz, 2H), 1.46 (t, *J* = 7.4 Hz, 3H). <sup>13</sup>C NMR (100 MHz, CDCl<sub>3</sub>) δ 154.9, 145.0, 144.9, 131.0, 129.9, 129.0, 127.9, 127.6, 115.6, 114.3, 111.9, 79.3,

24.3, 10.9. HRMS (GC/QTOF) *m/z*: [M]<sup>+</sup> calcd for C<sub>16</sub>H<sub>13</sub>N<sub>3</sub>, 247.1109; found 247.1099.

### 2,7-Diphenylpyrazolo[1,5-*a*]pyridine-3-carbonitrile (**3d**)

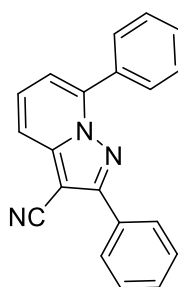

Flash column chromatography on silica gel (eluent: PE/EA = 7/1, v/v) to afford **3d**.

Yellow solid (55.8 mg, 63%), mp 136.2-137.0 °C. <sup>1</sup>H NMR (400 MHz, CDCl<sub>3</sub>) δ 8.15 (d, *J* = 5.8 Hz, 2H), 7.97 – 7.93 (m, 2H), 7.72 (d, *J* = 8.7 Hz, 1H), 7.57 – 7.53 (m, 3H), 7.51 – 7.44 (m, 4H), 7.06 (d, *J* = 7.1 Hz, 1H). <sup>13</sup>C NMR (100 MHz, CDCl<sub>3</sub>) δ 154.9, 145.7, 141.7,

132.1, 130.7, 130.1, 130.0, 129.4, 128.9, 128.4, 128.0, 127.5, 115.5, 115.3, 115.2, 79.5. HRMS (GC/QTOF)  $m/z$ :  $[M]^+$  calcd for  $C_{20}H_{13}N_3$ , 295.1109; found 295.1101.

### 5-Methyl-2-phenylpyrazolo[1,5-*a*]pyridine-3-carbonitrile (3e)

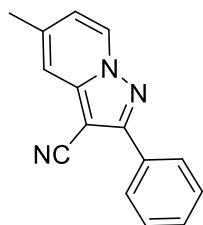

Flash column chromatography on silica gel (eluent: PE/EA = 7/1, v/v) to afford **3e**.

Yellow solid (55.9 mg, 80%), mp 129.8-130.9 °C.  $^1H$  NMR (400 MHz,  $CDCl_3$ )  $\delta$  8.41 (d,  $J = 7.0$  Hz, 1H), 8.12 (d,  $J = 7.9$  Hz, 2H), 7.53 – 7.46 (m, 4H), 6.82 (d,  $J = 7.1$  Hz, 1H), 2.47 (s, 3H).  $^{13}C$  NMR (100 MHz,  $CDCl_3$ )  $\delta$  155.9, 144.8, 139.5, 130.7, 130.1, 129.0, 128.7, 127.5, 117.1, 115.6, 115.4, 78.3, 21.5. HRMS (GC/QTOF)  $m/z$ :  $[M]^+$

calcd for  $C_{15}H_{11}N_3$ , 233.0953; found 233.0958.

### 5-Ethyl-2-phenylpyrazolo[1,5-*a*]pyridine-3-carbonitrile (3f)

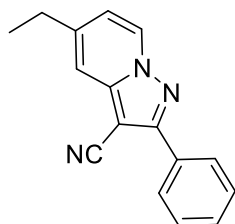

Flash column chromatography on silica gel (eluent: PE/EA = 7/1, v/v) to afford **3f**.

Yellow solid (60.8 mg, 82%), mp 134.5-135.6 °C.  $^1H$  NMR (400 MHz,  $CDCl_3$ )  $\delta$  8.44 (d,  $J = 7.3$  Hz, 1H), 8.13 (d,  $J = 8.2$  Hz, 2H), 7.56 – 7.46 (m, 4H), 6.87 (d,  $J = 6.9$  Hz, 1H), 2.79 (q,  $J = 7.6$  Hz, 2H), 1.34 (t,  $J = 7.6$  Hz, 3H).  $^{13}C$  NMR (100 MHz,  $CDCl_3$ )  $\delta$  155.9, 145.4, 144.9, 130.7, 130.0, 129.0, 128.8, 127.5, 116.2, 114.1, 78.5,

28.5, 14.2. HRMS (GC/QTOF)  $m/z$ :  $[M]^+$  calcd for  $C_{16}H_{13}N_3$ , 247.1109; found 247.1099.

### 5-Methoxy-2-phenylpyrazolo[1,5-*a*]pyridine-3-carbonitrile (3g)

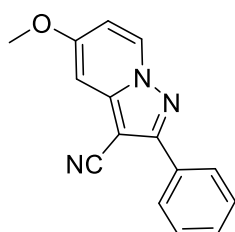

Flash column chromatography on silica gel (eluent: PE/EA = 7/1, v/v) to afford **3g**.

Yellow solid (58.3 mg, 78%), mp 110.4-111.5 °C.  $^1H$  NMR (400 MHz,  $CDCl_3$ )  $\delta$  8.35 (d,  $J = 7.5$  Hz, 1H), 8.12 – 8.08 (m, 2H), 7.53 – 7.47 (m, 3H), 6.95 (d,  $J = 2.6$  Hz, 1H), 6.66 (dd,  $J = 7.6, 2.7$  Hz, 1H), 3.94 (s, 3H).  $^{13}C$  NMR (100 MHz,  $CDCl_3$ )  $\delta$  159.9, 156.2, 146.4, 130.7, 130.3, 130.1, 129.0, 127.4, 115.7, 109.1, 94.4, 78.4,

56.3. HRMS (GC/QTOF)  $m/z$ :  $[M]^+$  calcd for  $C_{15}H_{11}N_3O$ , 249.0902; found 249.0893.

### 5-Phenoxy-2-phenylpyrazolo[1,5-a]pyridine-3-carbonitrile (3h)

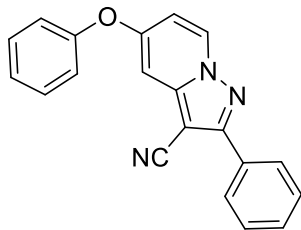

Flash column chromatography on silica gel (eluent: PE/EA = 7/1, v/v) to afford **3h**. Yellow solid (56.9 mg, 61%), mp 137.2-138.0 °C. <sup>1</sup>H NMR (400 MHz, CDCl<sub>3</sub>) δ 8.46 (d, *J* = 7.3 Hz, 1H), 8.09 (d, *J* = 6.1 Hz, 2H), 7.52 – 7.46 (m, 5H), 7.33 (t, *J* = 7.4 Hz, 1H), 7.16 (d, *J* = 7.7 Hz, 2H), 6.88 – 6.80 (m, 2H). <sup>13</sup>C NMR (100 MHz, CDCl<sub>3</sub>) δ 159.0, 156.7, 153.9, 146.1, 130.9, 130.7, 130.6, 130.2, 129.1, 127.5, 126.2, 120.9, 115.4, 109.0, 99.4, 78.9. HRMS (GC/QTOF) *m/z*: [M]<sup>+</sup> calcd for C<sub>20</sub>H<sub>13</sub>N<sub>3</sub>O, 311.1059; found 311.1053.

### 2,5-Diphenylpyrazolo[1,5-a]pyridine-3-carbonitrile (3i)

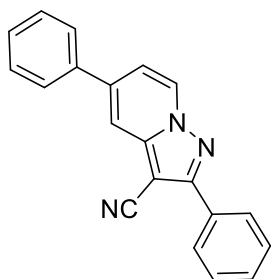

Flash column chromatography on silica gel (eluent: PE/EA = 7/1, v/v) to afford **3i**. Yellow solid (57.5 mg, 65%), mp 136.5-137.6 °C. <sup>1</sup>H NMR (400 MHz, CDCl<sub>3</sub>) δ 8.59 (d, *J* = 8.0 Hz, 1H), 8.16 (d, *J* = 6.5 Hz, 2H), 7.92 (s, 1H), 7.70 (d, *J* = 6.9 Hz, 2H), 7.56 – 7.47 (m, 6H), 7.29 (dd, *J* = 7.2, 2.0 Hz, 1H). <sup>13</sup>C NMR (100 MHz, CDCl<sub>3</sub>) δ 156.4, 144.9, 141.2, 137.4, 130.6, 130.2 (2C), 129.4 (2C), 129.1, 127.6, 127.1, 115.3, 114.4, 113.7, 79.7. HRMS (GC/QTOF) *m/z*: [M]<sup>+</sup> calcd for C<sub>15</sub>H<sub>11</sub>N<sub>3</sub>O, 249.0902; found 249.0893.

### 5-(Benzyloxy)-2-phenylpyrazolo[1,5-a]pyridine-3-carbonitrile (3j)

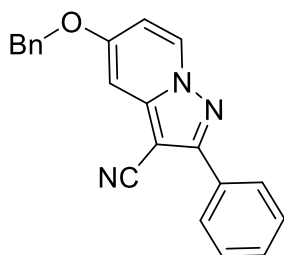

Flash column chromatography on silica gel (eluent: PE/EA = 7/1, v/v) to afford **3j**. Yellow solid (43.8 mg, 45%), mp 142.6-143.7 °C. <sup>1</sup>H NMR (400 MHz, CDCl<sub>3</sub>) δ 8.38 (d, *J* = 7.5 Hz, 1H), 8.11 (d, *J* = 6.3 Hz, 2H), 7.54 – 7.44 (m, 8H), 7.05 (d, *J* = 2.7 Hz, 1H), 6.74 (dd, *J* = 7.6, 2.6 Hz, 1H), 5.18 (s, 2H). <sup>13</sup>C NMR (100 MHz, CDCl<sub>3</sub>) δ 158.9, 146.3, 134.9, 130.7, 130.5, 130.1, 129.1, 129.0, 128.9, 127.9, 127.4, 115.7, 109.3, 95.6, 78.6, 71.1, 29.8. HRMS (ESI) *m/z*: [M+Na]<sup>+</sup> calcd for C<sub>21</sub>H<sub>15</sub>N<sub>3</sub>O<sub>2</sub>Na, 348.1113; found 348.1119.



### 2-Phenyl-5-(trifluoromethyl)pyrazolo[1,5-*a*]pyridine-3-carbonitrile (**3k**)

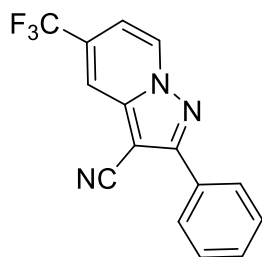

Flash column chromatography on silica gel (eluent: PE/EA = 7/1, v/v) to afford **3k**.

Yellow solid (66.3 mg, 77%), mp 138.2-139.4 °C. <sup>1</sup>H NMR (400 MHz, CDCl<sub>3</sub>) δ 8.66 (d, *J* = 7.2 Hz, 1H), 8.17 – 8.11 (m, 2H), 8.07 (s, 1H), 7.56 – 7.49 (m, 3H), 7.18 (d, *J* = 7.2 Hz, 1H). <sup>13</sup>C NMR (100 MHz, CDCl<sub>3</sub>) δ 157.1, 143.2, 130.7, 130.4, 130.0, 129.8, 129.7, 129.2, 127.6, 122.6 (q, *J* = 273.0 Hz), 115.0 (q, *J* = 4.7 Hz),

114.0, 110.5 (q, *J* = 2.9 Hz), 82.4. HRMS (ESI) *m/z*: [M+H]<sup>+</sup> calcd for C<sub>15</sub>H<sub>9</sub>F<sub>3</sub>N<sub>3</sub>, 288.0749; found 288.0754.

### 5,7-Dimethyl-2-phenylpyrazolo[1,5-*a*]pyridine-3-carbonitrile (**3l**)

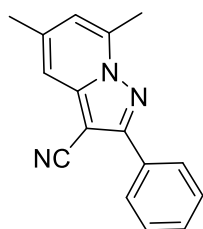

Flash column chromatography on silica gel (eluent: PE/EA = 7/1, v/v) to afford **3l**.

Yellow solid (54.8 mg, 74%), mp 132.6-132.7 °C. <sup>1</sup>H NMR (400 MHz, CDCl<sub>3</sub>) δ 8.16 (d, *J* = 6.7 Hz, 2H), 7.52 – 7.45 (m, 3H), 7.37 (s, 1H), 6.65 (s, 1H), 2.76 (s, 3H), 2.42 (s, 3H). <sup>13</sup>C NMR (100 MHz, CDCl<sub>3</sub>) δ 155.0, 145.0, 139.3, 138.9, 131.0, 129.8, 128.9, 127.5, 116.5, 115.8, 113.2, 78.2, 21.4, 17.6. HRMS (GC/QTOF) *m/z*: [M]<sup>+</sup> calcd for

C<sub>16</sub>H<sub>13</sub>N<sub>3</sub>, 247.1109; found 247.1101.

### 6,7-Dimethyl-2-phenylpyrazolo[1,5-*a*]pyridine-3-carbonitrile (**3m**)

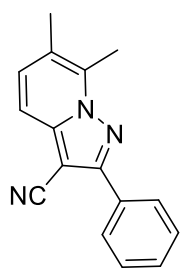

Flash column chromatography on silica gel (eluent: PE/EA = 7/1, v/v) to afford **3m**.

Yellow solid (51.9 mg, 70%), mp 130.3-131.4 °C. <sup>1</sup>H NMR (400 MHz, CDCl<sub>3</sub>) δ 8.16 (d, *J* = 7.2 Hz, 2H), 7.52 – 7.44 (m, 4H), 7.23 (d, *J* = 8.9 Hz, 1H), 2.76 (s, 3H), 2.36 (s, 3H). <sup>13</sup>C NMR (100 MHz, CDCl<sub>3</sub>) δ 154.5, 143.4, 137.3, 131.2, 131.1, 129.8, 128.9, 127.4, 121.7, 115.7, 113.2, 78.7, 18.0, 14.1. HRMS (GC/QTOF) *m/z*: [M]<sup>+</sup> calcd for C<sub>16</sub>H<sub>13</sub>N<sub>3</sub>,

247.1109; found 247.1100.

### 2-(*p*-Tolyl)pyrazolo[1,5-*a*]pyridine-3-carbonitrile (**4a**)

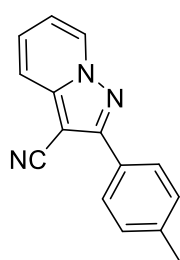

Flash column chromatography on silica gel (eluent: PE/EA = 7/1, v/v) to afford **4a**.

Yellow solid (50.3 mg, 72%), mp 130.3-131.4 °C. <sup>1</sup>H NMR (400 MHz, CDCl<sub>3</sub>) δ 8.55 (d, *J* = 7.0 Hz, 1H), 8.04 (d, *J* = 8.3 Hz, 2H), 7.75 (d, *J* = 8.9 Hz, 1H), 7.44 (t, 1H), 7.33 (d, *J*

= 8.0 Hz, 2H), 7.01 (t,  $J = 6.2$  Hz, 1H), 2.43 (s, 3H).  $^{13}\text{C}$  NMR (100 MHz,  $\text{CDCl}_3$ )  $\delta$  156.1, 144.6, 140.4, 129.8, 129.5, 127.8, 127.7, 127.5, 117.0, 115.3, 114.5, 79.3, 21.6. HRMS (GC/QTOF)  $m/z$ :  $[\text{M}]^+$  calcd for  $\text{C}_{15}\text{H}_{11}\text{N}_3$ , 233.0953; found 233.0958.

#### 2-(4-Butylphenyl)pyrazolo[1,5-*a*]pyridine-3-carbonitrile (**4b**)

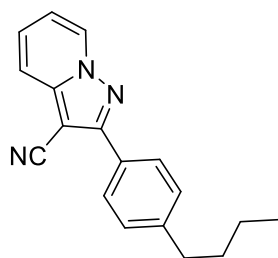

Flash column chromatography on silica gel (eluent: PE/EA = 7/1, v/v) to afford **4b**. Yellow solid (62.7 mg, 76%), mp 133.4-134.5 °C.  $^1\text{H}$  NMR (400 MHz,  $\text{CDCl}_3$ )  $\delta$  8.48 (d,  $J = 6.9$  Hz, 1H), 8.03 (d,  $J = 8.0$  Hz, 2H), 7.67 (d,  $J = 8.9$  Hz, 1H), 7.37 (d,  $J = 8.7$  Hz, 1H), 7.30 (d,  $J = 7.8$  Hz, 2H), 6.93 (t,  $J = 7.0$  Hz, 1H), 2.65 (t,  $J = 7.7$  Hz, 2H), 1.66 – 1.58 (m, 2H), 1.41 – 1.32 (m, 2H), 0.93 (t,  $J = 7.3$  Hz, 3H).  $^{13}\text{C}$  NMR (100 MHz,  $\text{CDCl}_3$ )  $\delta$  155.8, 145.2, 144.4, 129.3, 129.0, 127.7, 127.6, 127.3, 116.7, 115.1, 114.4, 79.0, 35.5, 33.4, 22.3, 13.9. HRMS (GC/QTOF)  $m/z$ :  $[\text{M}]^+$  calcd for  $\text{C}_{18}\text{H}_{17}\text{N}_3$ , 275.1422; found 275.1413.

#### 2-(4-Methoxyphenyl)pyrazolo[1,5-*a*]pyridine-3-carbonitrile (**4c**)

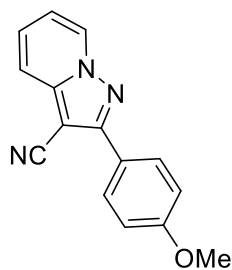

Flash column chromatography on silica gel (eluent: PE/EA = 7/1, v/v) to afford **4c**. Yellow solid (55.3 mg, 74%), mp 132.5-133.6 °C.  $^1\text{H}$  NMR (400 MHz,  $\text{CDCl}_3$ )  $\delta$  8.54 (d,  $J = 6.9$  Hz, 1H), 8.11 (d,  $J = 8.7$  Hz, 2H), 7.74 (d,  $J = 7.6$  Hz, 1H), 7.44 (t, 1H), 7.06 – 6.97 (m, 3H), 3.89 (s, 3H).  $^{13}\text{C}$  NMR (100 MHz,  $\text{CDCl}_3$ )  $\delta$  161.2, 155.8, 144.7, 132.3, 129.5, 129.0, 127.7, 123.1, 116.9, 115.4, 114.5, 114.4, 113.5, 78.9, 55.5. HRMS (GC/QTOF)  $m/z$ :  $[\text{M}]^+$  calcd for  $\text{C}_{15}\text{H}_{11}\text{N}_3\text{O}$ , 249.0902; found 249.0894.

#### 2-(4-Fluorophenyl)pyrazolo[1,5-*a*]pyridine-3-carbonitrile (**4d**)

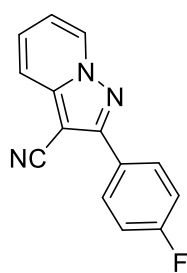

Flash column chromatography on silica gel (eluent: PE/EA = 7/1, v/v) to afford **4d**. Yellow solid (49.8 mg, 70%), mp 135.8-136.9 °C.  $^1\text{H}$  NMR (400 MHz,  $\text{CDCl}_3$ )  $\delta$  8.55 (d,  $J = 7.1$  Hz, 1H), 8.18 – 8.09 (m, 2H), 7.76 (d,  $J = 7.3$  Hz, 1H), 7.47 (t,  $J = 7.8$  Hz, 1H), 7.21 (t,  $J = 8.7$  Hz, 2H), 7.04 (t,  $J = 7.0$  Hz, 1H).  $^{13}\text{C}$  NMR (100 MHz,  $\text{CDCl}_3$ )  $\delta$  155.0, 144.6, 129.6, 129.5, 128.0, 126.8, 117.1, 116.3, 116.1, 115.1, 114.8, 79.4. HRMS (GC/QTOF)  $m/z$ :  $[\text{M}]^+$  calcd for  $\text{C}_{14}\text{H}_8\text{FN}_3$ , 237.0702; found 237.0692.

#### 2-(4-Chlorophenyl)pyrazolo[1,5-a]pyridine-3-carbonitrile (4e)

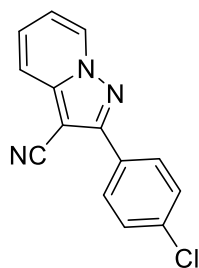

Flash column chromatography on silica gel (eluent: PE/EA = 7/1, v/v) to afford **4e**.

Yellow solid (50.9 mg, 67%), mp 138.2-139.3 °C. <sup>1</sup>H NMR (400 MHz, CDCl<sub>3</sub>) δ 8.56 (d, *J* = 6.9 Hz, 1H), 8.10 (d, *J* = 8.4 Hz, 2H), 7.77 (d, *J* = 8.9 Hz, 1H), 7.50 (d, *J* = 8.5 Hz, 3H), 7.05 (t, *J* = 6.9 Hz, 1H). <sup>13</sup>C NMR (100 MHz, CDCl<sub>3</sub>) δ 154.7, 144.6, 136.3, 129.6, 129.4, 129.0, 128.8, 128.0, 117.1, 114.9, 114.9, 79.5. HRMS (GC/QTOF) *m/z*:

[M]<sup>+</sup> calcd for C<sub>14</sub>H<sub>8</sub>ClN<sub>3</sub>, 253.0407; found 253.0403.

#### 2-(4-Bromophenyl)pyrazolo[1,5-a]pyridine-3-carbonitrile (4f)

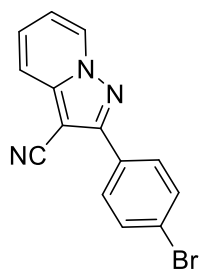

Flash column chromatography on silica gel (eluent: PE/EA = 7/1, v/v) to afford **4f**.

Yellow solid (61.5 mg, 69%), mp 138.4-139.5 °C. <sup>1</sup>H NMR (400 MHz, DMSO-*d*<sub>6</sub>) δ 8.98 (t, *J* = 6.8 Hz, 1H), 8.04 – 7.89 (m, 3H), 7.84 – 7.77 (m, 2H), 7.67 (q, *J* = 7.3 Hz, 1H), 7.27 (q, *J* = 6.8 Hz, 1H). <sup>13</sup>C NMR (100 MHz, DMSO-*d*<sub>6</sub>) δ 153.5, 143.8, 132.3, 130.3, 129.4, 129.3, 128.9, 123.7, 116.6, 115.8, 114.6, 78.0. HRMS (GC/QTOF) *m/z*:

[M]<sup>+</sup> calcd for C<sub>14</sub>H<sub>8</sub>BrN<sub>3</sub>, 296.9902; found 296.9893.

#### 2-([1,1'-Biphenyl]-4-yl)pyrazolo[1,5-a]pyridine-3-carbonitrile (4g)

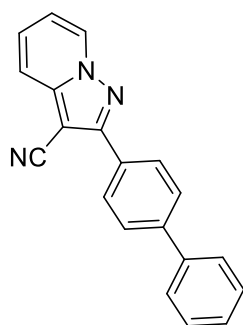

Flash column chromatography on silica gel (eluent: PE/EA = 7/1, v/v) to afford **4g**.

Yellow solid (68.2 mg, 77%), mp 139.3-140.4 °C. <sup>1</sup>H NMR (400 MHz, CDCl<sub>3</sub>) δ 8.56 (d, *J* = 6.9 Hz, 1H), 8.23 (d, *J* = 8.0 Hz, 2H), 7.75 (d, *J* = 8.2 Hz, 3H), 7.67 (d, *J* = 7.5 Hz, 2H), 7.51 – 7.35 (m, 4H), 7.02 (t, *J* = 6.9 Hz, 1H). <sup>13</sup>C NMR (100 MHz, CDCl<sub>3</sub>) δ 155.5, 144.6, 142.9, 140.3, 129.5, 129.4, 129.0, 127.9, 127.9, 127.8, 127.7, 127.2, 117.0, 114.7, 79.5. HRMS (GC/QTOF) *m/z*: [M]<sup>+</sup> calcd for C<sub>20</sub>H<sub>13</sub>N<sub>3</sub>,

295.1109; found 295.1111.

#### 2-(2-Methoxyphenyl)pyrazolo[1,5-a]pyridine-3-carbonitrile (4h)

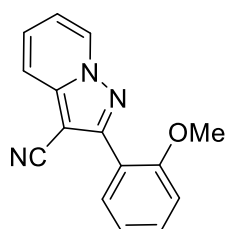

Flash column chromatography on silica gel (eluent: PE/EA = 7/1, v/v) to afford **4h**.

Yellow solid (50.8 mg, 68%), mp 136.5-137.6 °C. <sup>1</sup>H NMR (400 MHz, CDCl<sub>3</sub>) δ 8.53 (d, *J* = 7.0 Hz, 1H), 7.72 (d, *J* = 8.9 Hz, 1H), 7.67 (d, *J* = 7.6 Hz, 1H), 7.44 (t, *J* =

7.9 Hz, 1H), 7.38 (t, 1H), 7.10 – 7.01 (m, 2H), 6.94 (t,  $J = 6.9$  Hz, 1H), 3.95 (s, 3H).  $^{13}\text{C}$  NMR (100 MHz,  $\text{CDCl}_3$ )  $\delta$  157.2, 154.2, 143.8, 131.4, 130.9, 129.3, 127.4, 120.8, 119.4, 116.8, 114.6, 114.1, 111.4, 82.9, 55.2. HRMS (GC/QTOF)  $m/z$ :  $[\text{M}]^+$  calcd for  $\text{C}_{15}\text{H}_{11}\text{N}_3\text{O}$ , 249.0902; found 249.0893.

#### 2-(*m*-Tolyl)pyrazolo[1,5-*a*]pyridine-3-carbonitrile (4i)

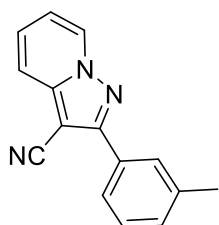

Flash column chromatography on silica gel (eluent: PE/EA = 7/1, v/v) to afford **4i**. Yellow solid (52.4 mg, 75%), mp 134.8-135.9 °C.  $^1\text{H}$  NMR (400 MHz,  $\text{CDCl}_3$ )  $\delta$  8.52 (d,  $J = 7.0$  Hz, 1H), 7.95 – 7.90 (m, 2H), 7.72 (d,  $J = 8.8$  Hz, 1H), 7.40 (q,  $J = 8.0$  Hz, 2H), 7.28 (d,  $J = 7.6$  Hz, 1H), 6.98 (t,  $J = 6.9$  Hz, 1H), 2.44 (s, 3H).  $^{13}\text{C}$  NMR (100 MHz,  $\text{CDCl}_3$ )  $^{13}\text{C}$  NMR (101 MHz, Chloroform-*d*)  $\delta$  155.9, 144.5, 138.7, 130.9, 130.3, 129.4, 128.9, 128.0, 127.7, 124.6, 116.9, 115.1, 114.5, 79.4, 21.5. HRMS (GC/QTOF)  $m/z$ :  $[\text{M}]^+$  calcd for  $\text{C}_{15}\text{H}_{11}\text{N}_3$ , 233.0953; found 233.0944.

#### 2-(3-Chlorophenyl)pyrazolo[1,5-*a*]pyridine-3-carbonitrile (4j)

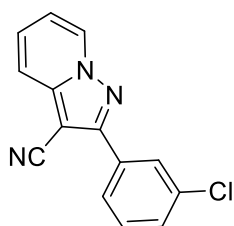

Flash column chromatography on silica gel (eluent: PE/EA = 7/1, v/v) to afford **4j**. Yellow solid (53.9 mg, 71%), mp 137.1-138.2 °C.  $^1\text{H}$  NMR (400 MHz,  $\text{CDCl}_3$ )  $\delta$  8.56 (d,  $J = 6.8$  Hz, 1H), 8.12 (s, 1H), 8.08 – 8.02 (m, 1H), 7.77 (d,  $J = 8.7$  Hz, 1H), 7.51 – 7.42 (m, 3H), 7.10 – 7.02 (m, 1H).  $^{13}\text{C}$  NMR (100 MHz,  $\text{CDCl}_3$ )  $\delta$  154.3, 144.5, 135.1, 132.2, 130.4, 130.2, 129.6, 128.1, 127.5, 125.6, 117.2, 115.0, 114.7, 79.7. HRMS (GC/QTOF)  $m/z$ :  $[\text{M}]^+$  calcd for  $\text{C}_{14}\text{H}_8\text{ClN}_3$ , 253.0407; found 253.0396.

#### 2-(3-Bromophenyl)pyrazolo[1,5-*a*]pyridine-3-carbonitrile (4k)

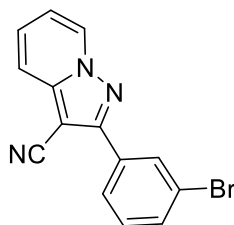

Flash column chromatography on silica gel (eluent: PE/EA = 7/1, v/v) to afford **4k**. Yellow solid (65.0 mg, 73%), mp 139.7-140.8 °C.  $^1\text{H}$  NMR (400 MHz,  $\text{CDCl}_3$ )  $\delta$  8.52 (d,  $J = 6.9$  Hz, 1H), 8.24 (s, 1H), 8.07 (d,  $J = 7.8$  Hz, 1H), 7.73 (d,  $J = 8.9$  Hz, 1H), 7.58 (d,  $J = 8.0$  Hz, 1H), 7.45 (t,  $J = 7.9$  Hz, 1H), 7.36 (t,  $J = 7.9$  Hz, 1H), 7.03 (t,  $J = 7.0$  Hz, 1H).  $^{13}\text{C}$  NMR (100 MHz,  $\text{CDCl}_3$ )  $\delta$  154.0, 144.5, 133.0, 132.4, 130.5, 130.2, 129.5, 128.0, 126.0, 123.1, 117.1, 114.9, 114.7, 79.6. HRMS (GC/QTOF)  $m/z$ :  $[\text{M}]^+$  calcd for  $\text{C}_{14}\text{H}_8\text{BrN}_3$ , 296.9902; found 296.9895.

### 2-(3,4-Dimethylphenyl)pyrazolo[1,5-a]pyridine-3-carbonitrile (**4l**)

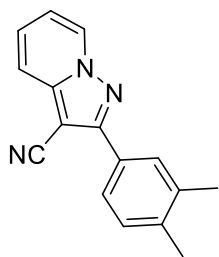

Flash column chromatography on silica gel (eluent: PE/EA = 7/1, v/v) to afford **4l**.

Yellow solid (51.9 mg, 70%), mp 131.6-132.7 °C. <sup>1</sup>H NMR (400 MHz, CDCl<sub>3</sub>) δ 8.51 (d, *J* = 6.9 Hz, 1H), 7.91 – 7.84 (m, 2H), 7.70 (d, *J* = 8.9 Hz, 1H), 7.40 (t, *J* = 7.3 Hz, 1H), 7.24 (s, 1H), 6.96 (t, *J* = 6.7 Hz, 1H), 2.34 (s, 3H), 2.32 (s, 3H). <sup>13</sup>C NMR (100 MHz, CDCl<sub>3</sub>) δ 156.0, 144.5, 139.0, 137.3, 130.2, 129.3, 128.4, 127.9, 127.6, 124.9,

116.8, 115.2, 114.4, 79.1, 19.8, 19.8. HRMS (GC/QTOF) *m/z*: [M]<sup>+</sup> calcd for C<sub>16</sub>H<sub>13</sub>N<sub>3</sub>, 247.1109; found 247.1099.

### 2-(Naphthalen-2-yl)pyrazolo[1,5-a]pyridine-3-carbonitrile (**4m**)

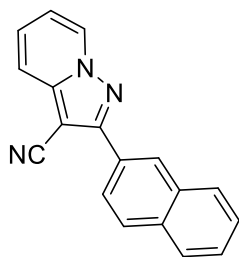

Flash column chromatography on silica gel (eluent: PE/EA = 7/1, v/v) to afford **4m**.

Yellow solid (60.5 mg, 75%), mp 133.5-134.6 °C. <sup>1</sup>H NMR (400 MHz, CDCl<sub>3</sub>) δ 8.66 (d, *J* = 6.9 Hz, 1H), 8.35 – 8.29 (m, 1H), 8.00 (d, *J* = 8.2 Hz, 1H), 7.97 – 7.92 (m, 1H), 7.88 – 7.81 (m, 2H), 7.62 (t, *J* = 7.7 Hz, 1H), 7.57 – 7.49 (m, 3H), 7.09 (t, *J* = 6.9 Hz, 1H). <sup>13</sup>C NMR (100 MHz, CDCl<sub>3</sub>) δ 157.0, 143.8, 134.0, 131.2, 130.5,

129.7, 129.0, 128.6, 128.0, 127.7, 127.2, 126.4, 125.6, 125.3, 117.2, 114.7, 114.5, 83.1. HRMS (GC/QTOF) *m/z*: [M]<sup>+</sup> calcd for C<sub>18</sub>H<sub>11</sub>N<sub>3</sub>, 269.0953; found 269.0949.

### 2-(Thiophen-2-yl)pyrazolo[1,5-a]pyridine-3-carbonitrile (**4n**)

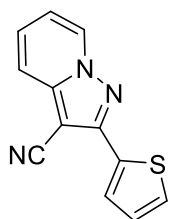

Flash column chromatography on silica gel (eluent: PE/EA = 7/1, v/v) to afford **4n**. Yellow

solid (47.9 mg, 71%), mp 128.7-129.8 °C. <sup>1</sup>H NMR (400 MHz, CDCl<sub>3</sub>) δ 8.52 (d, *J* = 7.0 Hz, 1H), 7.99 (d, *J* = 3.7 Hz, 1H), 7.72 (d, *J* = 8.8 Hz, 1H), 7.49 – 7.41 (m, 2H), 7.19 (t, 1H), 7.01 (t, *J* = 6.9 Hz, 1H). <sup>13</sup>C NMR (100 MHz, CDCl<sub>3</sub>) δ 151.1, 144.3, 132.6, 129.5,

128.4, 128.3, 128.2, 128.1, 116.9, 114.7, 114.7, 78.7. HRMS (GC/QTOF) *m/z*: [M]<sup>+</sup> calcd for C<sub>12</sub>H<sub>17</sub>N<sub>3</sub>S, 225.0361; found 225.0351.

### 2-Phenylpyrazolo[1,5-a]pyridine-3-carbonitrile (**6a**)

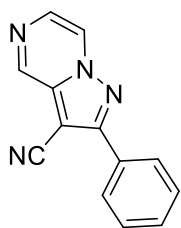

Flash column chromatography on silica gel (eluent: PE/EA = 7/1, v/v) to afford **6a**. Yellow solid (42.9 mg, 65%), mp 121.4-122.6 °C. <sup>1</sup>H NMR (400 MHz, CDCl<sub>3</sub>) δ 9.28 (s, 1H), 8.49 (d, *J* = 4.6 Hz, 1H), 8.19 – 8.14 (m, 3H), 7.58 – 7.52 (m, 3H). <sup>13</sup>C NMR (100 MHz, CDCl<sub>3</sub>) δ 156.6, 143.3, 139.0, 132.5, 130.9, 129.6, 129.3, 127.8, 122.1, 113.5, 81.0. HRMS (GC/QTOF) *m/z*: [M]<sup>+</sup> calcd for C<sub>13</sub>H<sub>8</sub>N<sub>4</sub>, 220.0749; found 220.0745.

#### 2-(*p*-Tolyl)pyrazolo[1,5-*a*]pyrazine-3-carbonitrile (**6b**)

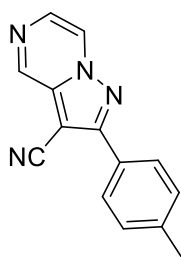

Flash column chromatography on silica gel (eluent: PE/EA = 7/1, v/v) to afford **6b**. Yellow solid (42.1 mg, 60%), mp 123.5-124.8 °C. <sup>1</sup>H NMR (400 MHz, CDCl<sub>3</sub>) δ 9.27 (s, 1H), 8.48 (d, *J* = 4.6 Hz, 1H), 8.17 (s, 1H), 8.06 (d, *J* = 8.0 Hz, 2H), 7.35 (d, *J* = 7.9 Hz, 2H), 2.45 (s, 3H). <sup>13</sup>C NMR (100 MHz, CDCl<sub>3</sub>) δ 156.7, 143.1, 141.3, 132.4, 130.0, 127.6, 126.8, 122.1, 113.6, 80.7, 21.68. HRMS (GC/QTOF) *m/z*: [M]<sup>+</sup> calcd for C<sub>14</sub>H<sub>10</sub>N<sub>4</sub>, 234.0905; found 234.0902.

#### 2-(4-Chlorophenyl)pyrazolo[1,5-*a*]pyrazine-3-carbonitrile (**6c**)

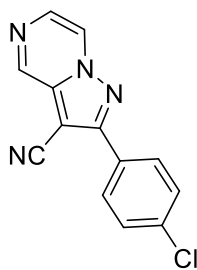

Flash column chromatography on silica gel (eluent: PE/EA = 7/1, v/v) to afford **6c**. Yellow solid (41.9 mg, 55%), mp 131.2-133.6 °C. <sup>1</sup>H NMR (400 MHz, CDCl<sub>3</sub>) δ 9.28 (s, 1H), 8.48 (s, 1H), 8.20 (s, 1H), 8.15 – 8.07 (m, 2H), 7.55 – 7.46 (m, 2H). <sup>13</sup>C NMR (100 MHz, CDCl<sub>3</sub>) δ 155.3, 143.3, 138.9, 137.1, 132.7, 129.6, 129.0, 128.1, 122.1, 113.3, 80.9. HRMS (GC/QTOF) *m/z*: [M]<sup>+</sup> calcd for C<sub>13</sub>H<sub>7</sub>ClN<sub>4</sub>, 254.0359; found 254.0351.

#### 2-(*m*-Tolyl)pyrazolo[1,5-*a*]pyrazine-3-carbonitrile (**6d**)

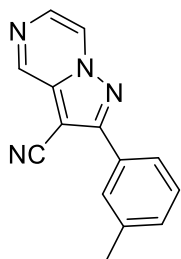

Flash column chromatography on silica gel (eluent: PE/EA = 7/1, v/v) to afford **6d**. Yellow solid (40.0 mg, 57%), mp 126.7-127.9 °C. <sup>1</sup>H NMR (400 MHz, CDCl<sub>3</sub>) δ 9.28 (s, 1H), 8.48 (d, *J* = 4.7 Hz, 1H), 8.17 (d, *J* = 4.7 Hz, 1H), 7.96 (s, 2H), 7.44 (t, *J* = 7.9 Hz, 1H), 7.34 (d, *J* = 7.6 Hz, 1H), 2.47 (s, 3H). <sup>13</sup>C NMR (100 MHz, CDCl<sub>3</sub>) δ 156.7, 143.3, 139.1, 132.5, 131.7, 129.5, 129.2, 128.3, 124.9, 122.1, 113.5, 81.0, 21.6. HRMS (GC/QTOF) *m/z*: [M]<sup>+</sup> calcd for C<sub>14</sub>H<sub>10</sub>N<sub>4</sub>, 234.0905; found 234.0902.

### 2-(3-Chlorophenyl)pyrazolo[1,5-*a*]pyrazine-3-carbonitrile (**6e**)

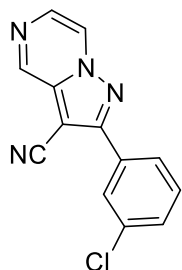

Flash column chromatography on silica gel (eluent: PE/EA = 7/1, v/v) to afford **6e**.

Yellow solid (44.2 mg, 58%), mp 133.4-134.9 °C. <sup>1</sup>H NMR (400 MHz, CDCl<sub>3</sub>) δ 9.31 (s, 1H), 8.53 – 8.46 (m, 1H), 8.23 – 8.19 (m, 1H), 8.15 (s, 1H), 8.10 – 8.05 (m, 1H), 7.52 – 7.48 (m, 2H).

<sup>13</sup>C NMR (100 MHz, CDCl<sub>3</sub>) δ 155.0, 143.4, 135.4, 132.8, 131.3, 130.9, 130.6, 127.7, 125.8, 113.1, 81.2. HRMS (GC/QTOF) m/z: [M]<sup>+</sup> calcd for C<sub>13</sub>H<sub>17</sub>ClN<sub>4</sub>,

254.0359; found 254.0358.

### 2-(3,4-Dimethylphenyl)pyrazolo[1,5-*a*]pyrazine-3-carbonitrile (**6f**)

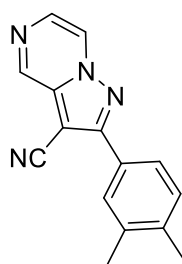

Flash column chromatography on silica gel (eluent: PE/EA = 7/1, v/v) to afford **6f**.

Yellow solid (39.4 mg, 53%), mp 136.3-137.2 °C. <sup>1</sup>H NMR (400 MHz, CDCl<sub>3</sub>) δ 9.26 (s, 1H), 8.47 (d, *J* = 4.6 Hz, 1H), 8.15 (d, *J* = 4.6 Hz, 1H), 7.95 – 7.87 (m, 2H), 7.31 (d, *J* = 7.8 Hz, 1H), 2.38 (s, 3H), 2.35 (s, 3H).

<sup>13</sup>C NMR (100 MHz, CDCl<sub>3</sub>) δ 156.8, 143.1, 140.0, 139.0, 137.8, 132.4, 130.5, 128.7, 127.1, 125.2, 122.1, 113.6, 80.7, 20.0. HRMS

(GC/QTOF) m/z: [M]<sup>+</sup> calcd for C<sub>15</sub>H<sub>12</sub>N<sub>4</sub>, 248.1062; found 248.1056.

### 2-Phenylpyrazolo[5,1-*a*]isoquinoline-1-carbonitrile (**7'**)

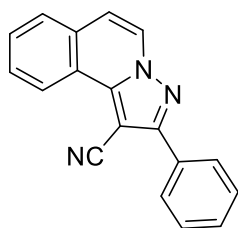

Flash column chromatography on silica gel (eluent: PE/EA = 7/1, v/v) to afford **7'**.

Yellow solid (48.4 mg, 60%), mp 142.3-144.2 °C. <sup>1</sup>H NMR (400 MHz, CDCl<sub>3</sub>) δ 8.91 – 8.86 (m, 1H), 8.32 (d, *J* = 7.4 Hz, 1H), 8.17 (d, *J* = 6.7 Hz, 2H), 7.86 – 7.82 (m, 1H), 7.75 – 7.71 (m, 2H), 7.57 – 7.46 (m, 3H), 7.24 (s, 2H).

<sup>13</sup>C NMR (100 MHz, CDCl<sub>3</sub>) δ 155.4, 141.7, 130.6, 130.2, 130.1, 130.0, 129.1, 128.9, 127.7, 127.5, 126.1,

124.1, 123.3, 116.7, 115.1, 81.6. HRMS (GC/QTOF) m/z: [M]<sup>+</sup> calcd for C<sub>18</sub>H<sub>11</sub>N<sub>3</sub>, 269.0953; found 269.0943.

### Ethyl 2-phenylpyrazolo[1,5-*a*]pyridine-3-carboxylate (**8**)

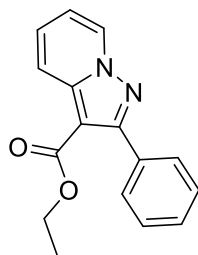

Flash column chromatography on silica gel (eluent: PE/EA = 7/1, v/v) to afford **8**.

Yellow solid (43.9 mg, 55%), mp 145.1-146.4 °C. <sup>1</sup>H NMR (400 MHz, CDCl<sub>3</sub>) δ 8.40

(d, *J* = 6.9 Hz, 1H), 8.09 (d, *J* = 8.9 Hz, 1H), 7.71 – 7.68 (m, 2H), 7.37 – 7.32 (m, 3H),

7.29 – 7.23 (m, 1H), 6.80 (t, *J* = 6.8 Hz, 1H), 4.21 (q, *J* = 7.1 Hz, 2H), 1.19 (t, *J* = 7.1 Hz,

3H). <sup>13</sup>C NMR (100 MHz, CDCl<sub>3</sub>) δ 163.5, 156.9, 142.6, 132.5, 129.9, 128.8, 128.7,

127.7, 127.2, 119.7, 113.8, 100.7, 59.8, 14.2. HRMS (GC/QTOF) *m/z*: [M]<sup>+</sup> calcd for C<sub>18</sub>H<sub>11</sub>N<sub>3</sub>, 266.1055, found 266.1051.

### 2-Phenylpyrazolo[1,5-*a*]pyridine-3-carboxamide (**9**)

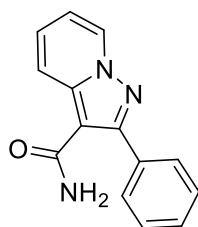

Flash column chromatography on silica gel (eluent: PE/EA = 7/1, v/v) to afford **9**.

Yellow solid (32.0 mg, 45%), mp 145.1-146.4 °C. <sup>1</sup>H NMR (400 MHz, DMSO-*d*<sub>6</sub>) δ

8.77 (d, *J* = 6.9 Hz, 1H), 7.93 (d, *J* = 9.0 Hz, 1H), 7.81 (d, *J* = 7.2 Hz, 2H), 7.53 – 7.40

(m, 5H), 7.05 (t, *J* = 6.9 Hz, 2H). <sup>13</sup>C NMR (100 MHz, DMSO-*d*<sub>6</sub>) δ 165.1, 152.0, 140.4,

132.5, 128.9, 128.8, 128.5, 126.0, 118.3, 113.7, 105.4. HRMS (GC/QTOF) *m/z*: [M]<sup>+</sup>

calcd for C<sub>14</sub>H<sub>11</sub>N<sub>3</sub>O, 237.0902; found 237.0893.



### 3. NMR spectra for new compounds

$^1\text{H}$  NMR (400 MHz,  $\text{CDCl}_3$ ) and  $^{13}\text{C}$  NMR (100 MHz,  $\text{CDCl}_3$ ) spectrum of compound **3a**

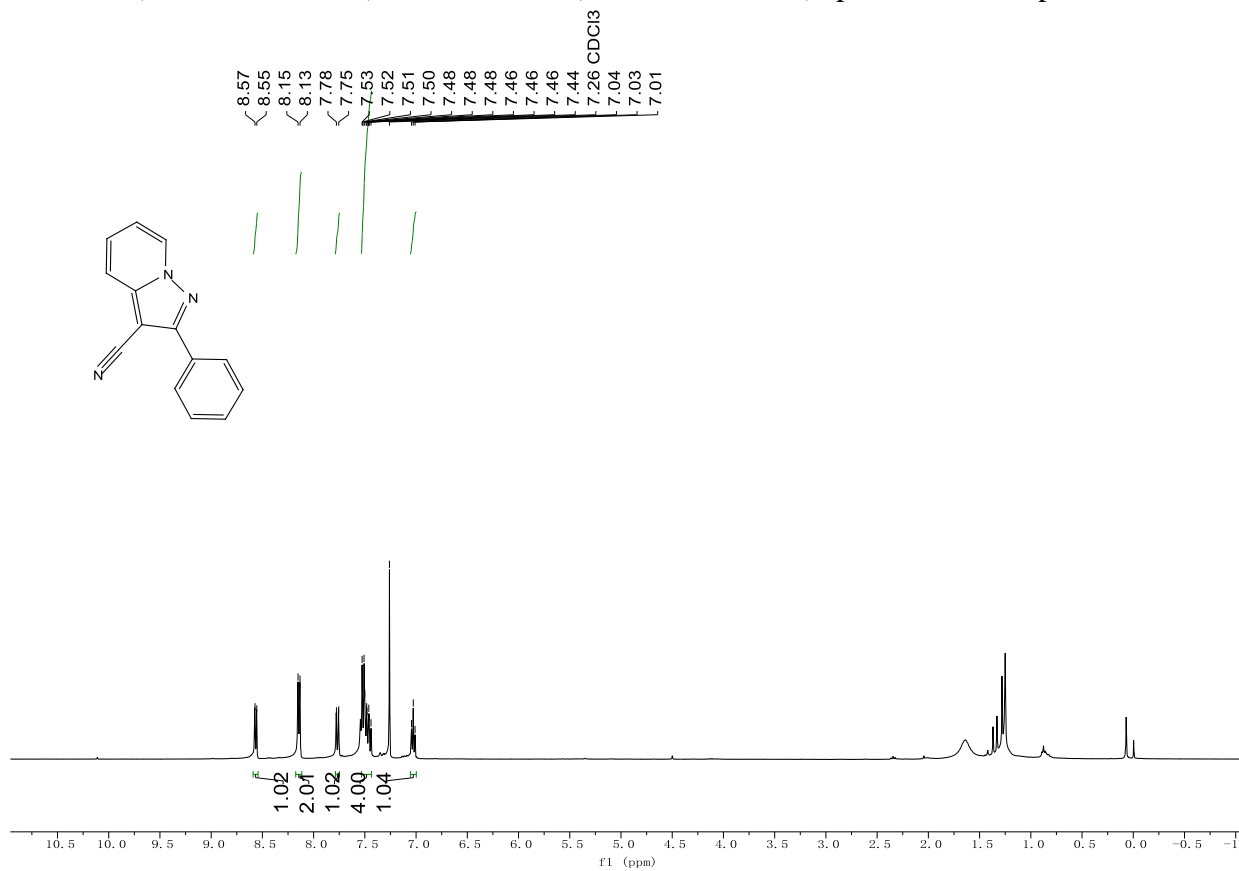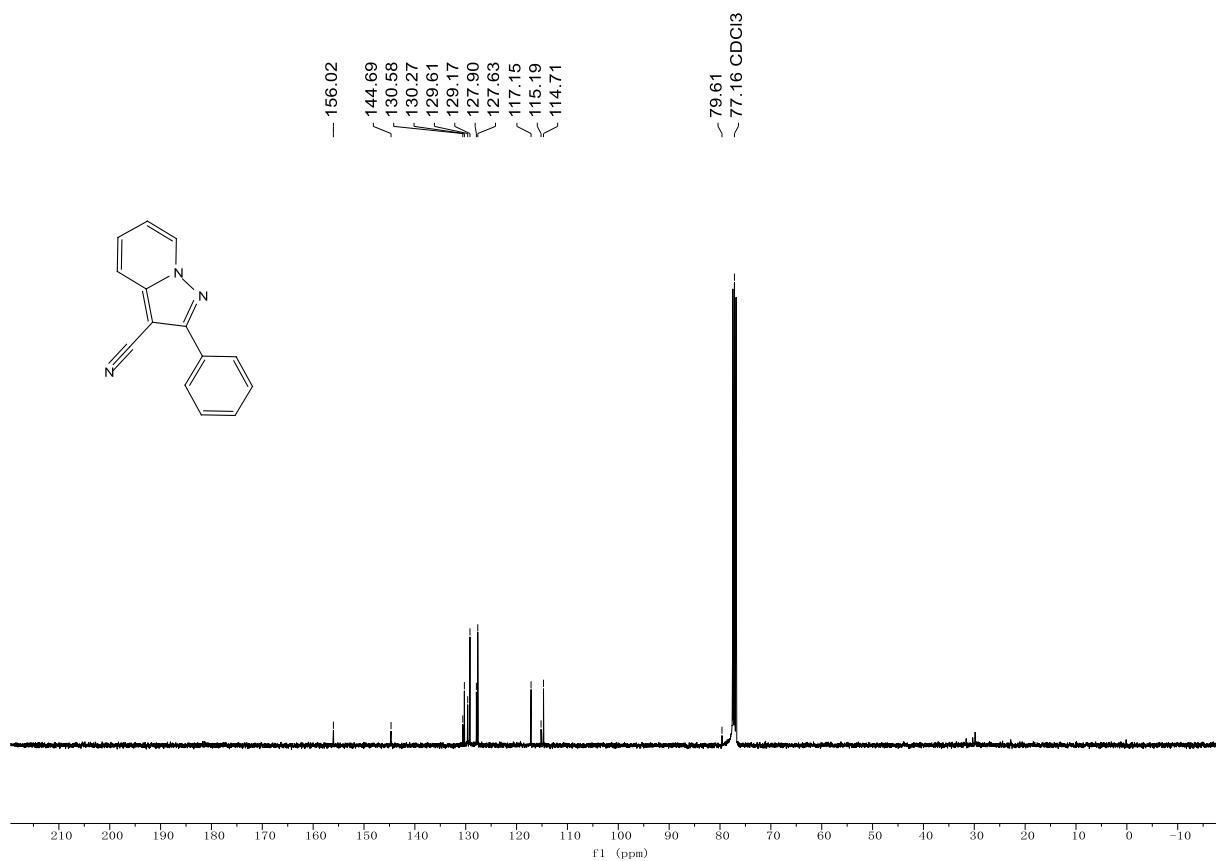

$^1\text{H}$  NMR (400 MHz,  $\text{CDCl}_3$ ) and  $^{13}\text{C}$  NMR (100 MHz,  $\text{CDCl}_3$ ) spectrum of compound **3b**

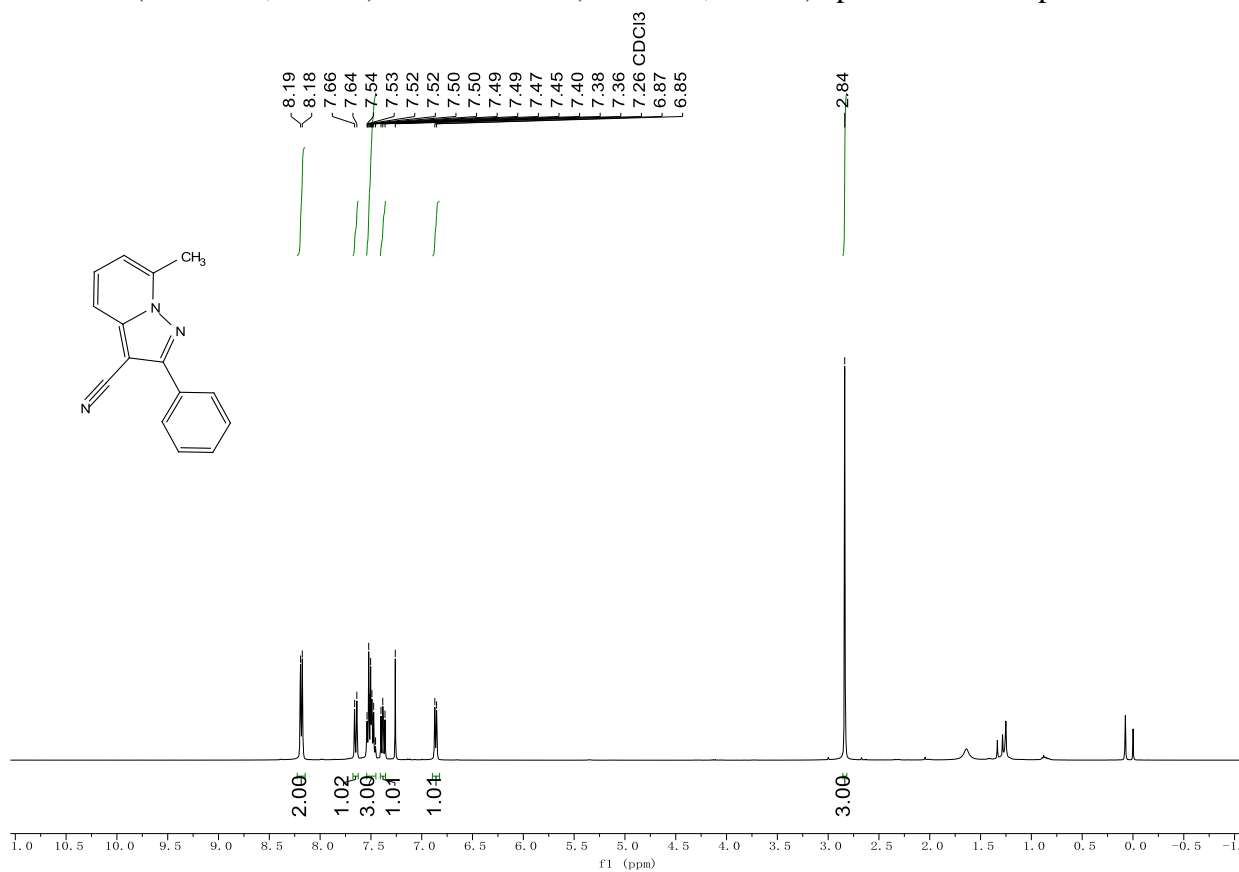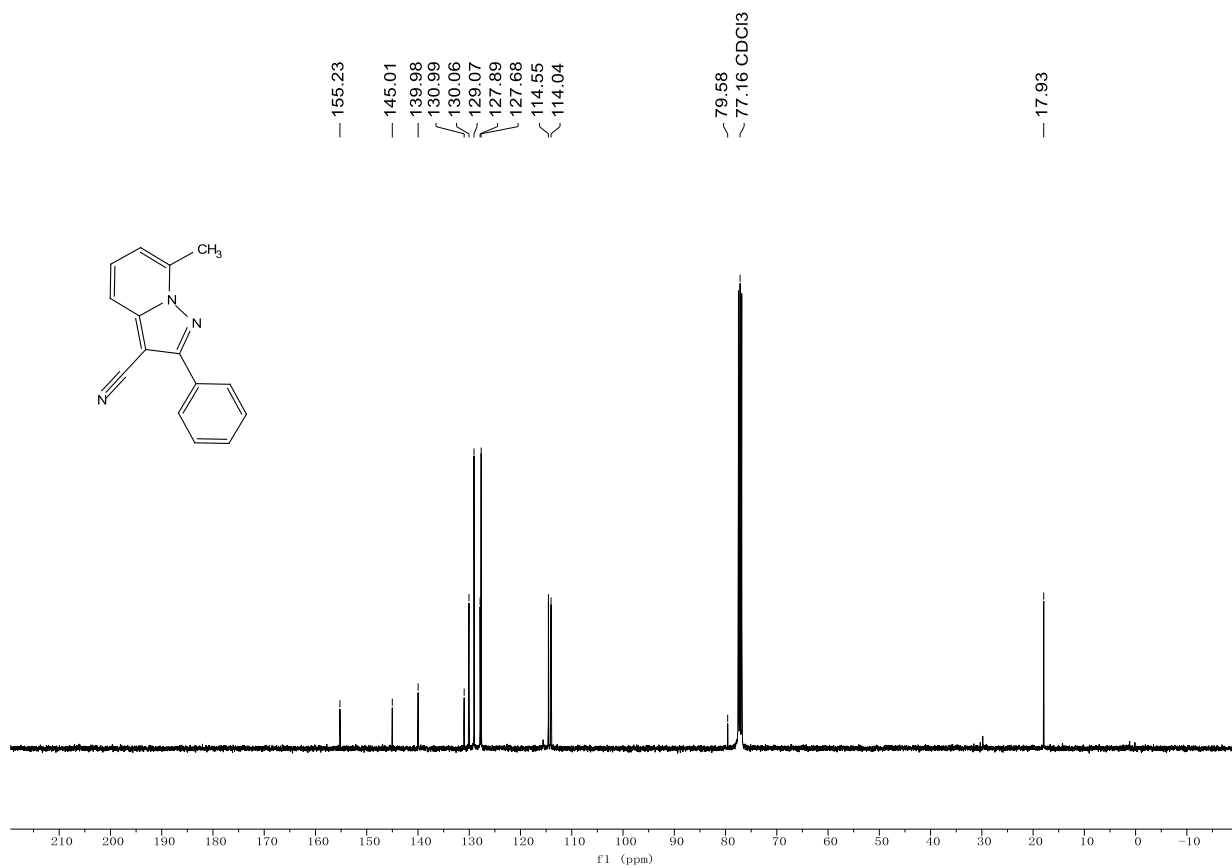

$^1\text{H}$  NMR (400 MHz,  $\text{CDCl}_3$ ) and  $^{13}\text{C}$  NMR (100 MHz,  $\text{CDCl}_3$ ) spectrum of compound **3c**

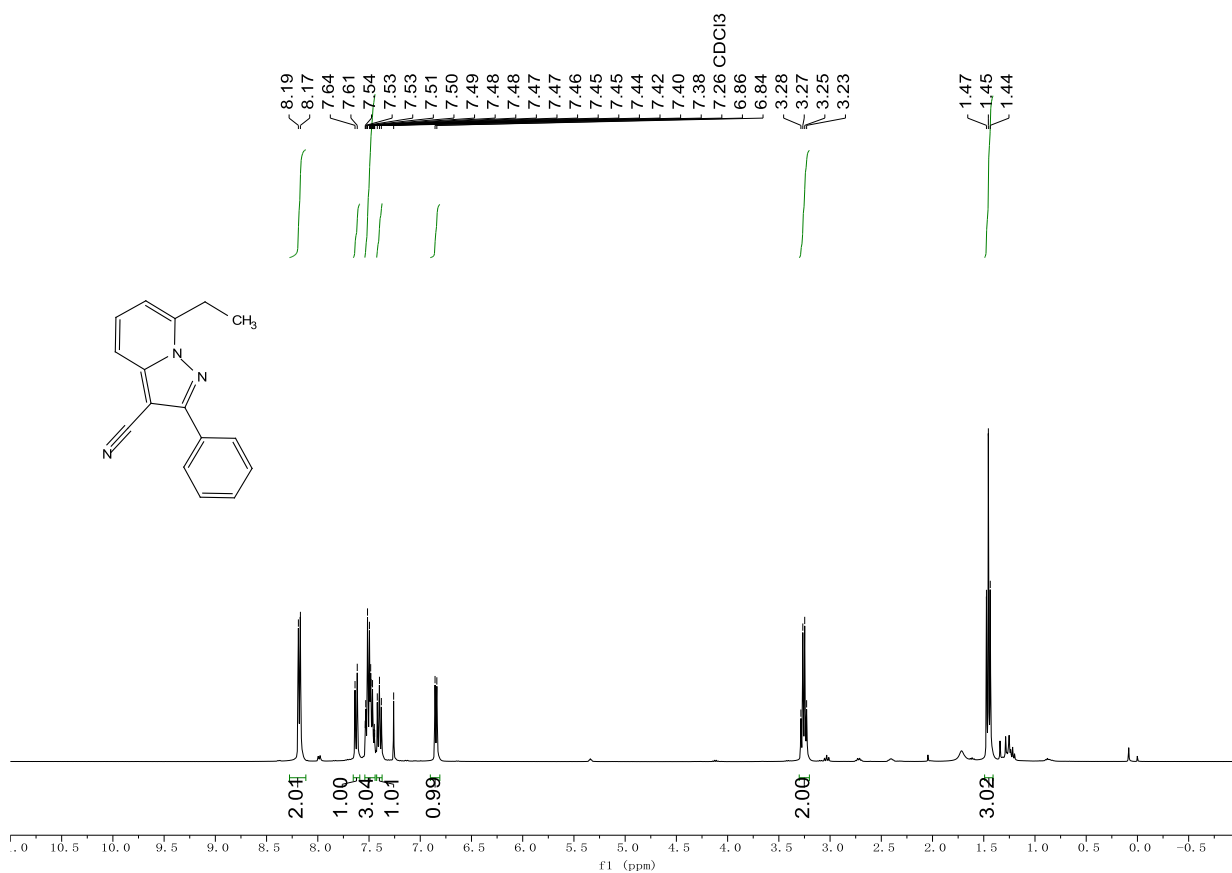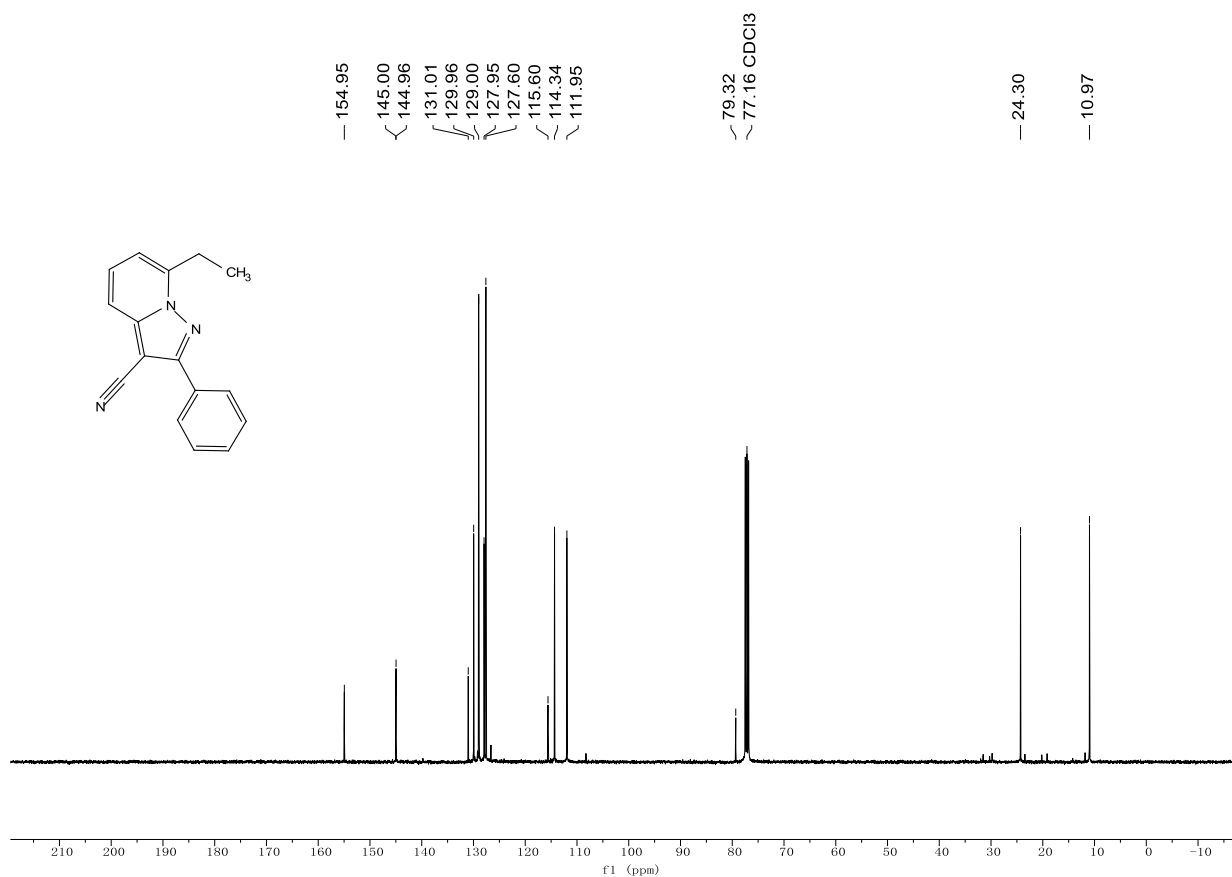

$^1\text{H}$  NMR (400 MHz,  $\text{CDCl}_3$ ) and  $^{13}\text{C}$  NMR (100 MHz,  $\text{CDCl}_3$ ) spectrum of compound **3d**

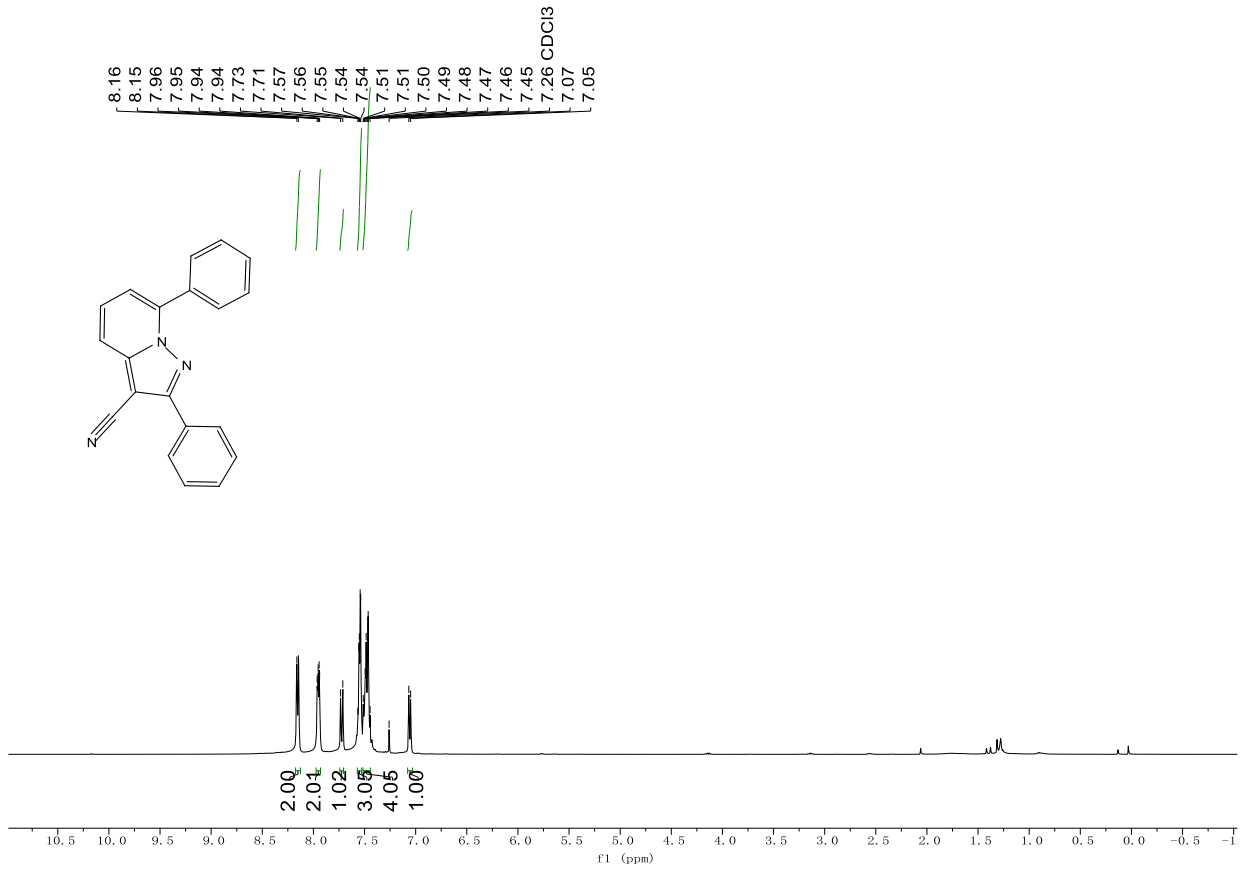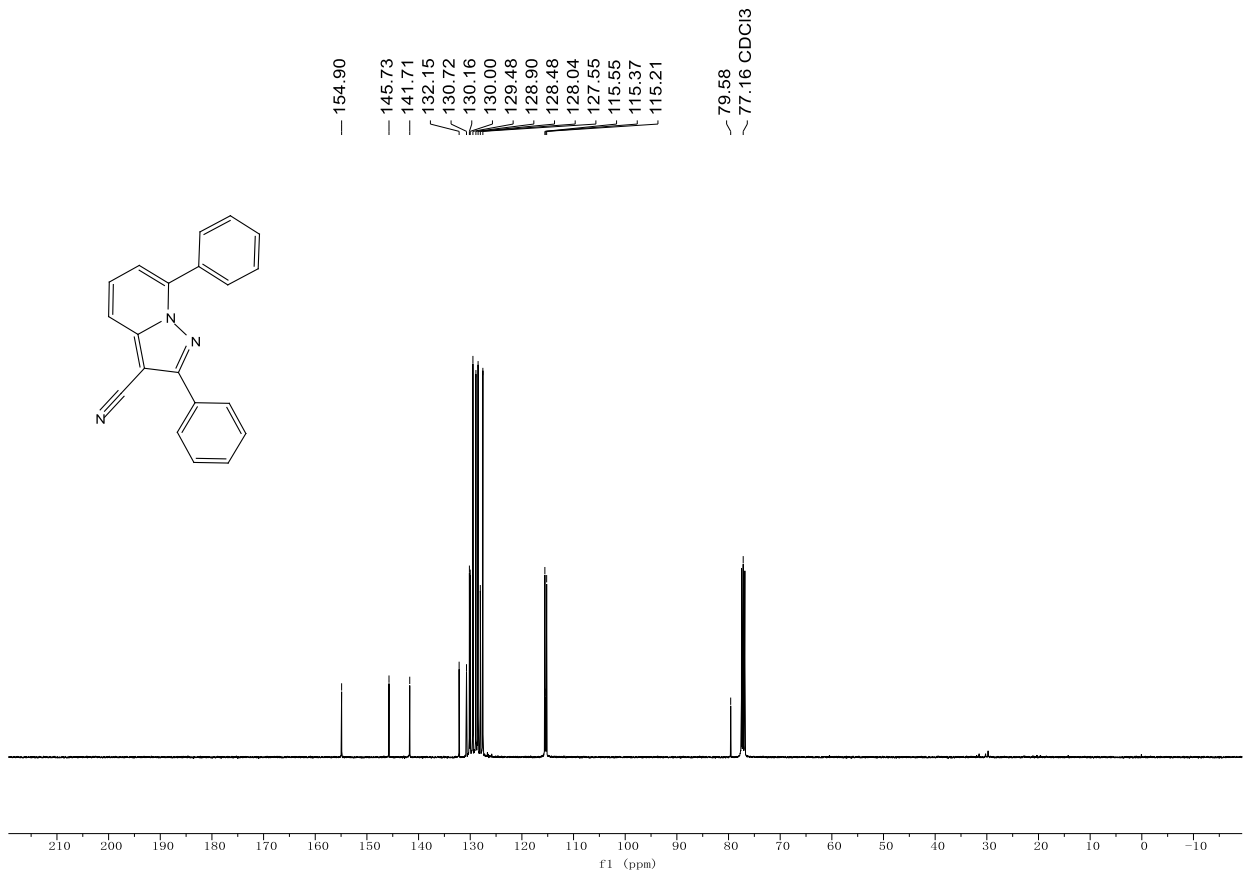

$^1\text{H}$  NMR (400 MHz,  $\text{CDCl}_3$ ) and  $^{13}\text{C}$  NMR (100 MHz,  $\text{CDCl}_3$ ) spectrum of compound **3e**

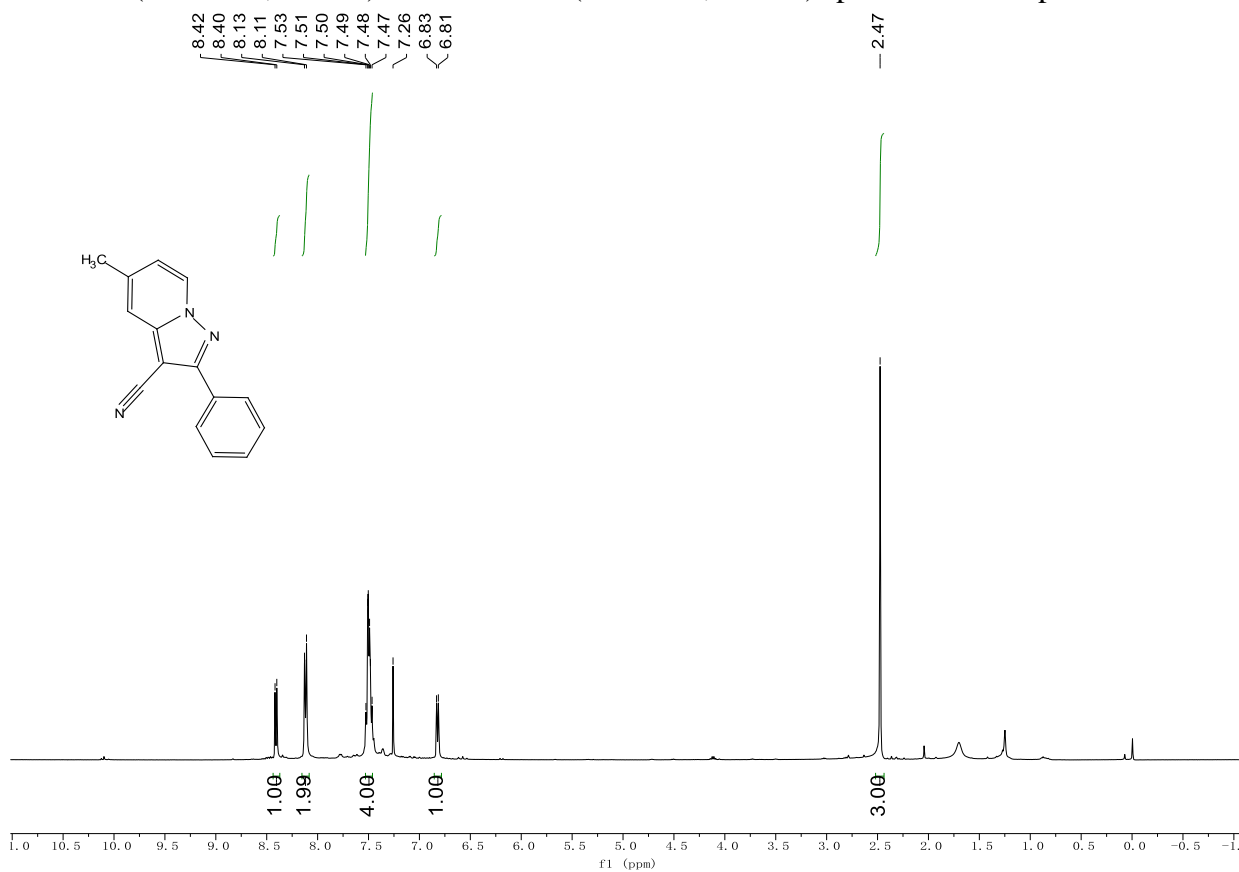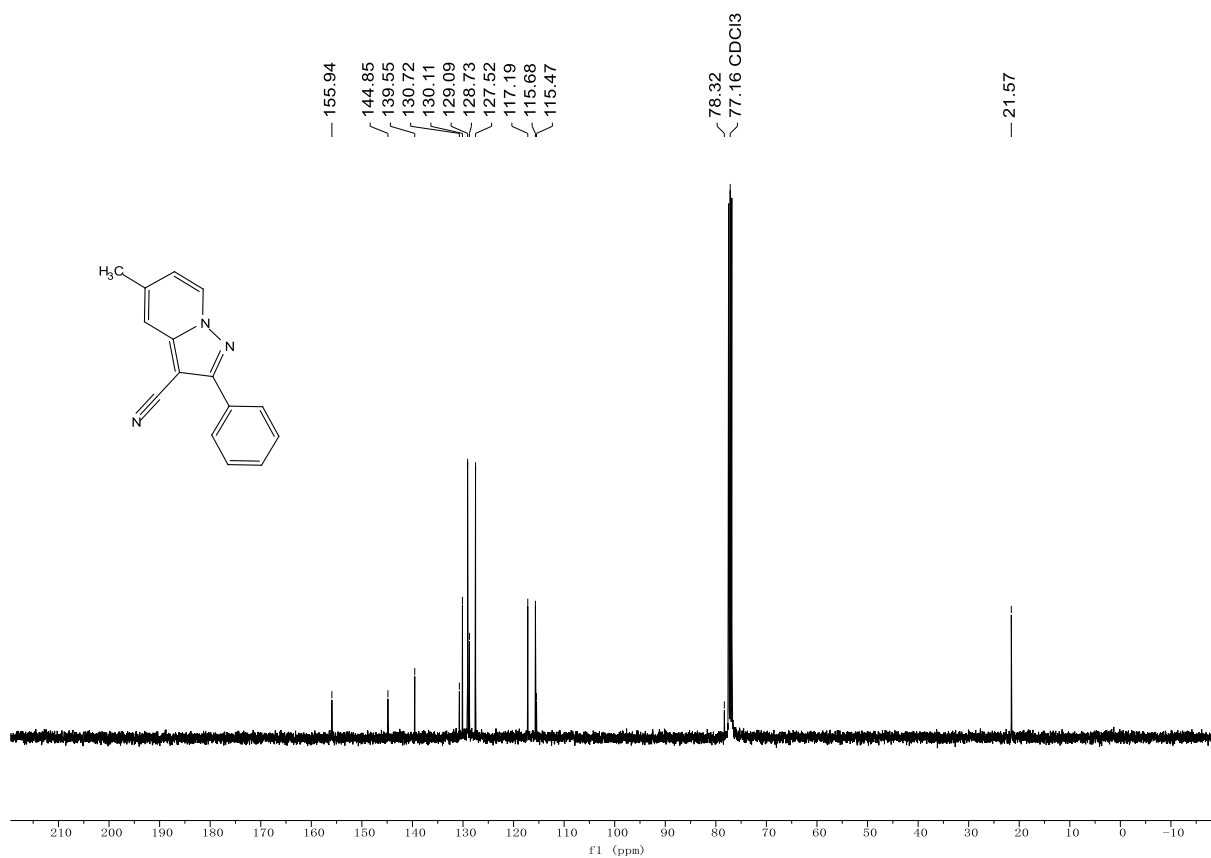

$^1\text{H}$  NMR (400 MHz,  $\text{CDCl}_3$ ) and  $^{13}\text{C}$  NMR (100 MHz,  $\text{CDCl}_3$ ) spectrum of compound **3f**

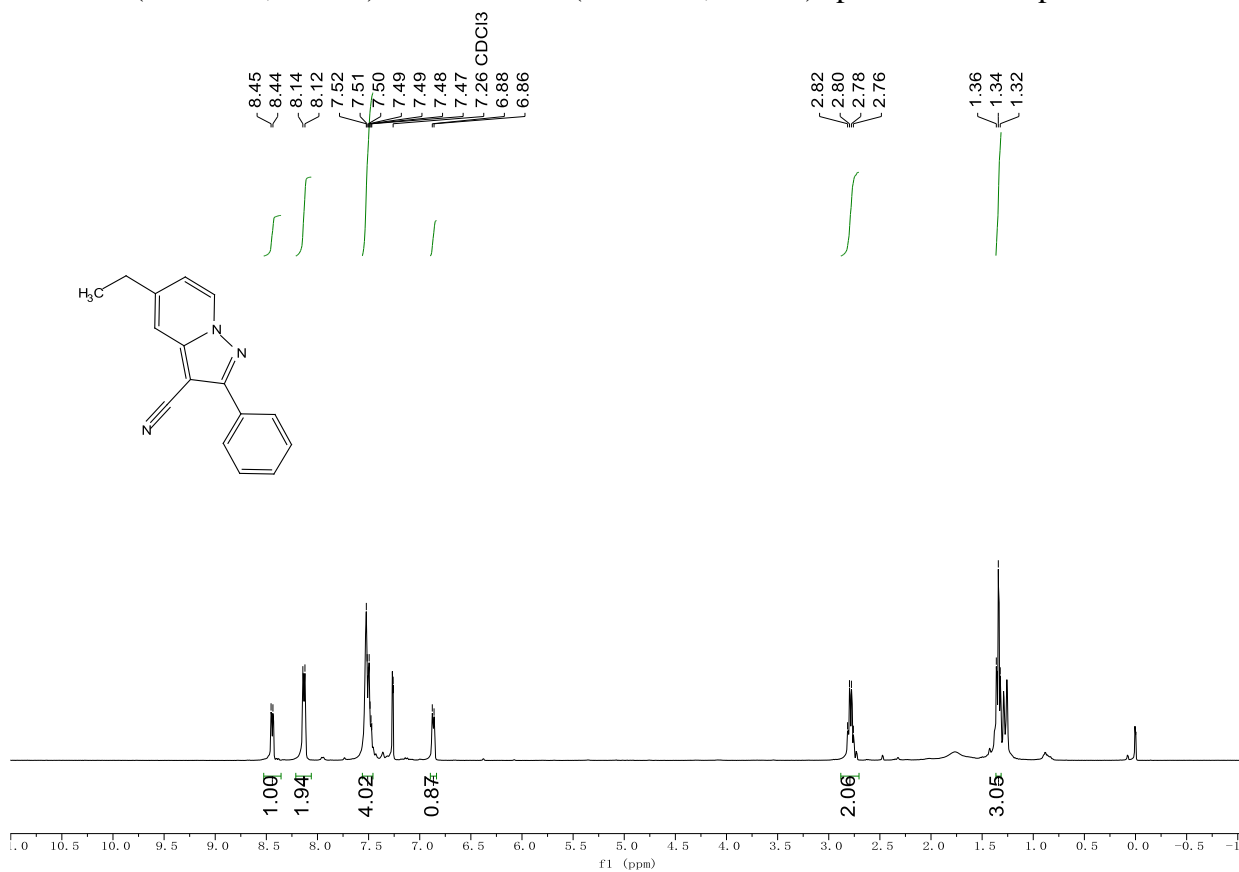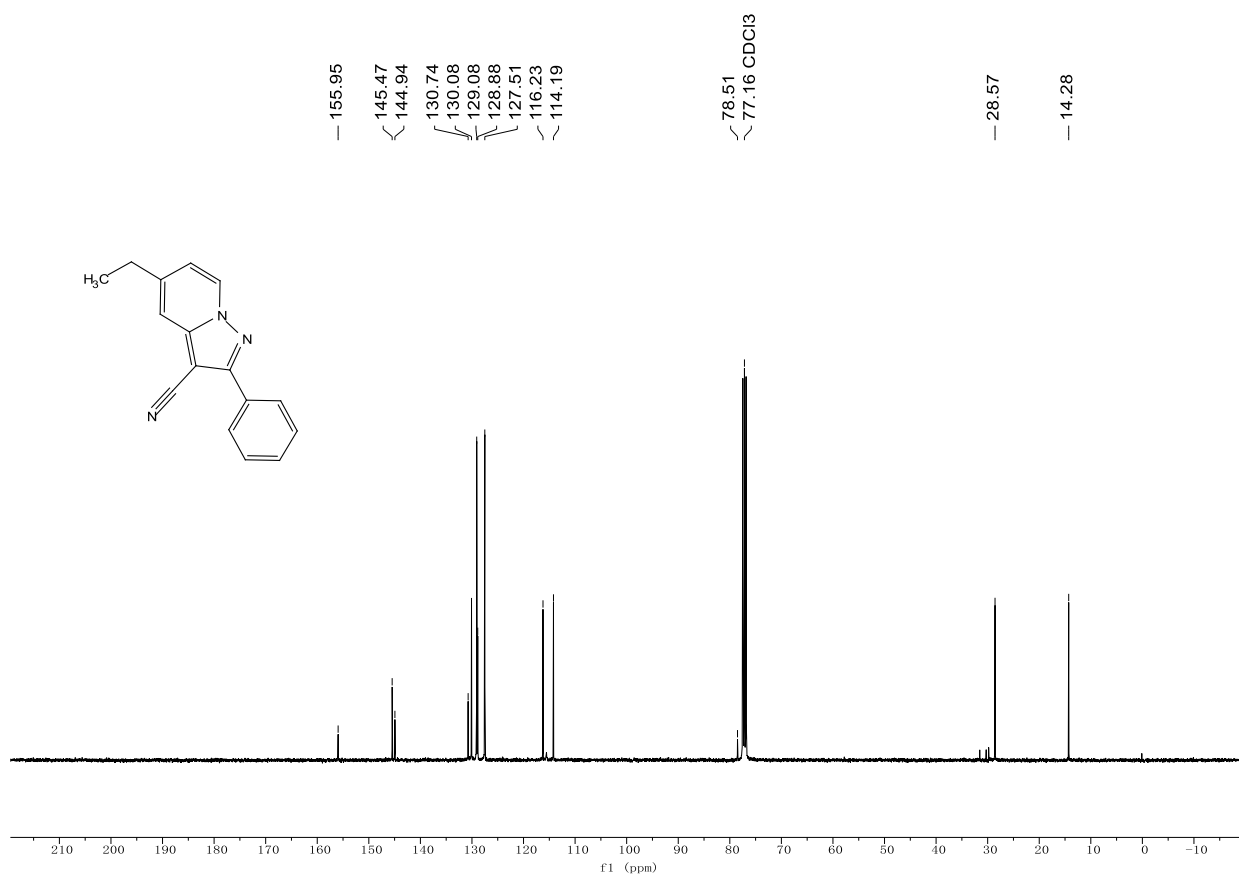

$^1\text{H}$  NMR (400 MHz,  $\text{CDCl}_3$ ) and  $^{13}\text{C}$  NMR (100 MHz,  $\text{CDCl}_3$ ) spectrum of compound **3g**

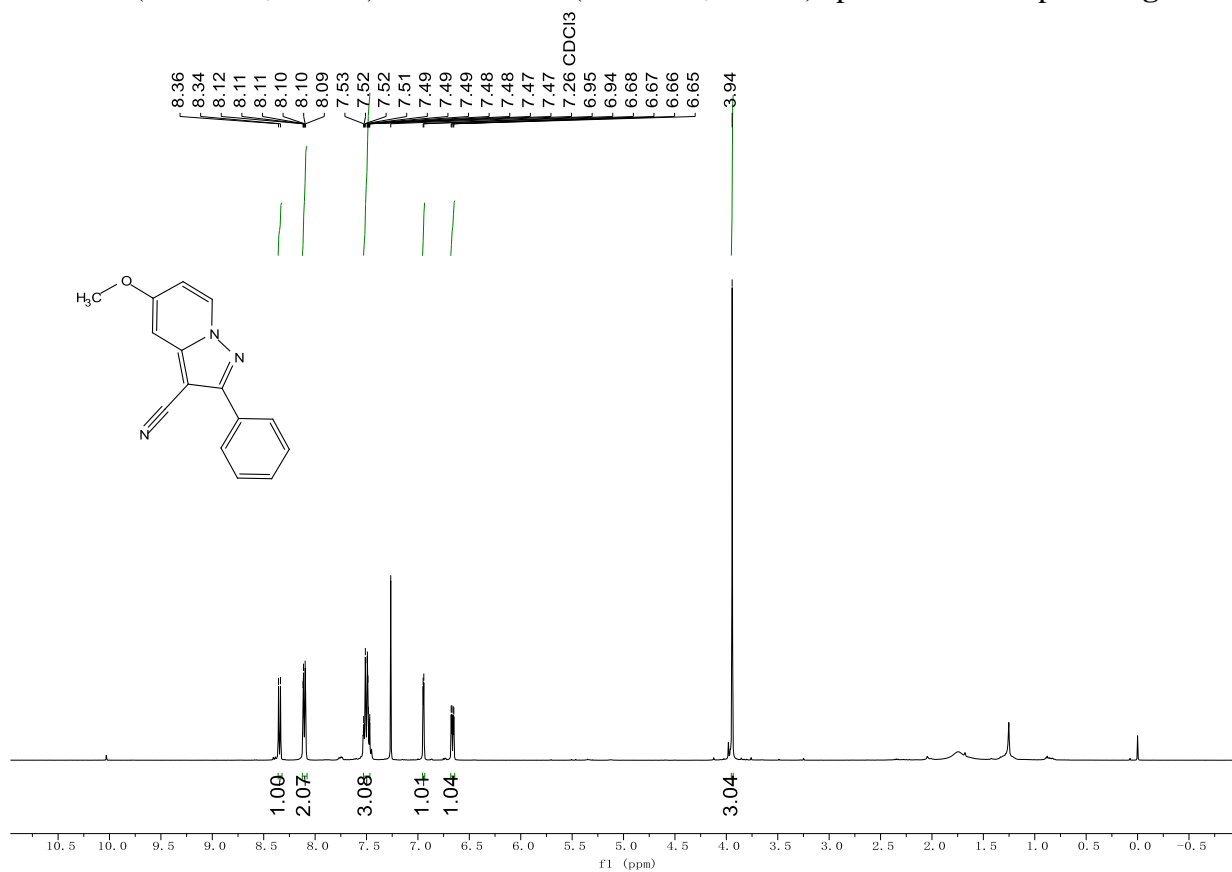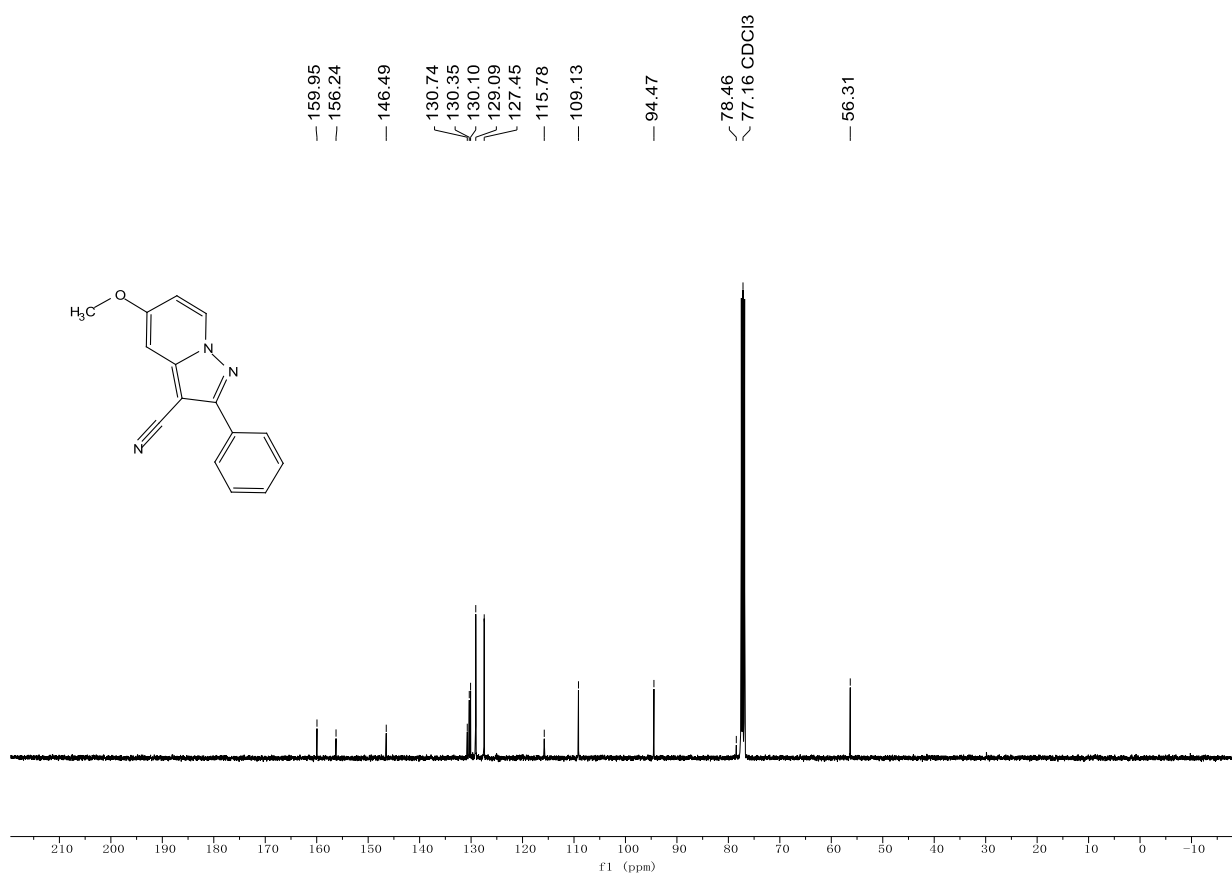

$^1\text{H}$  NMR (400 MHz,  $\text{CDCl}_3$ ) and  $^{13}\text{C}$  NMR (100 MHz,  $\text{CDCl}_3$ ) spectrum of compound **3h**

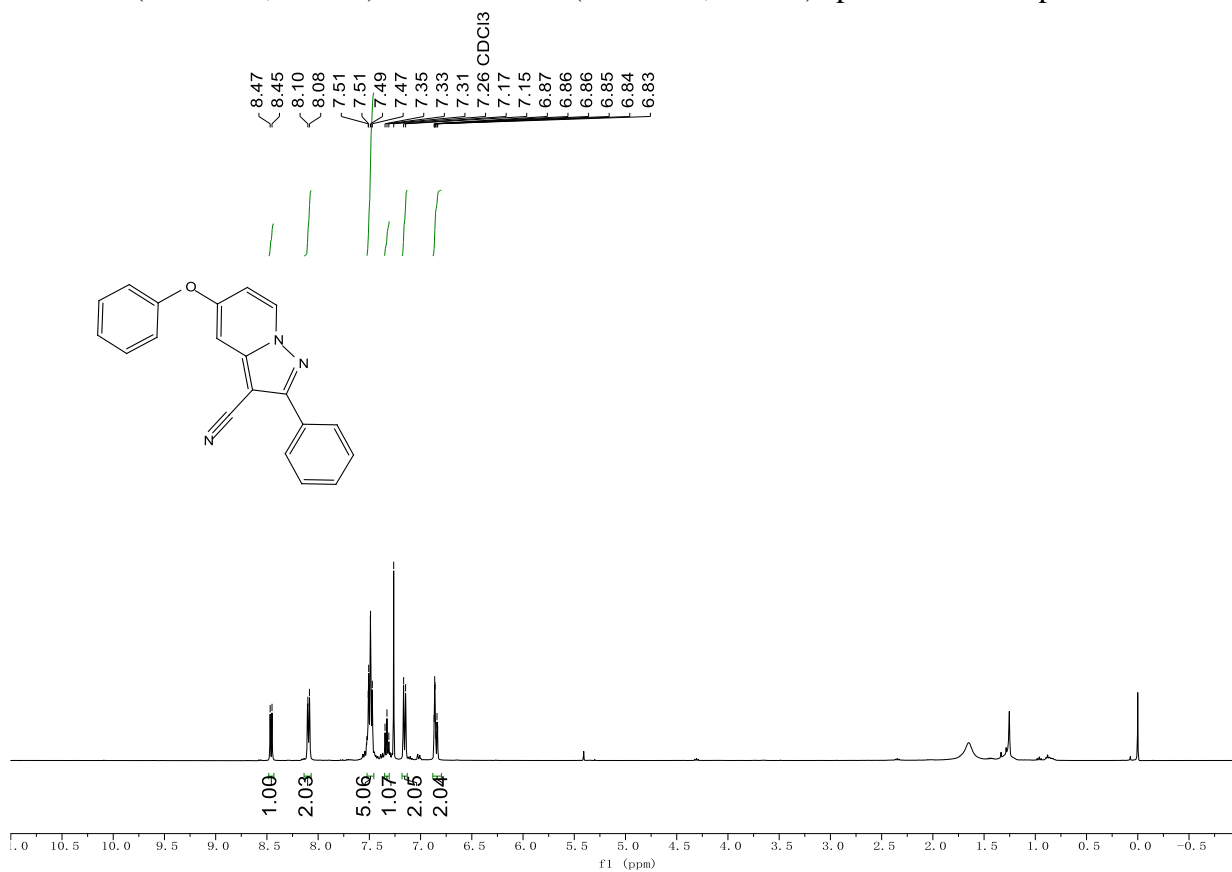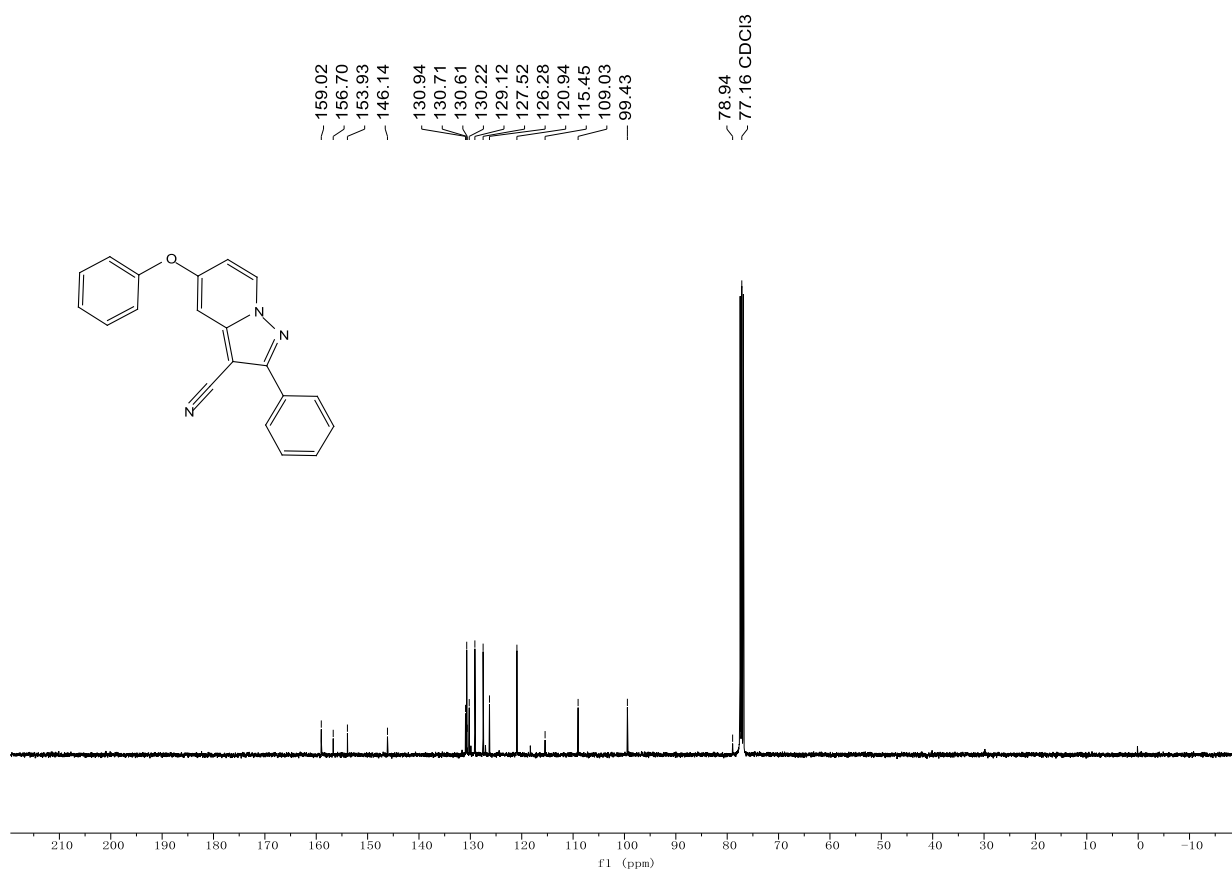



$^1\text{H}$  NMR (400 MHz,  $\text{CDCl}_3$ ) and  $^{13}\text{C}$  NMR (100 MHz,  $\text{CDCl}_3$ ) spectrum of compound **3i**

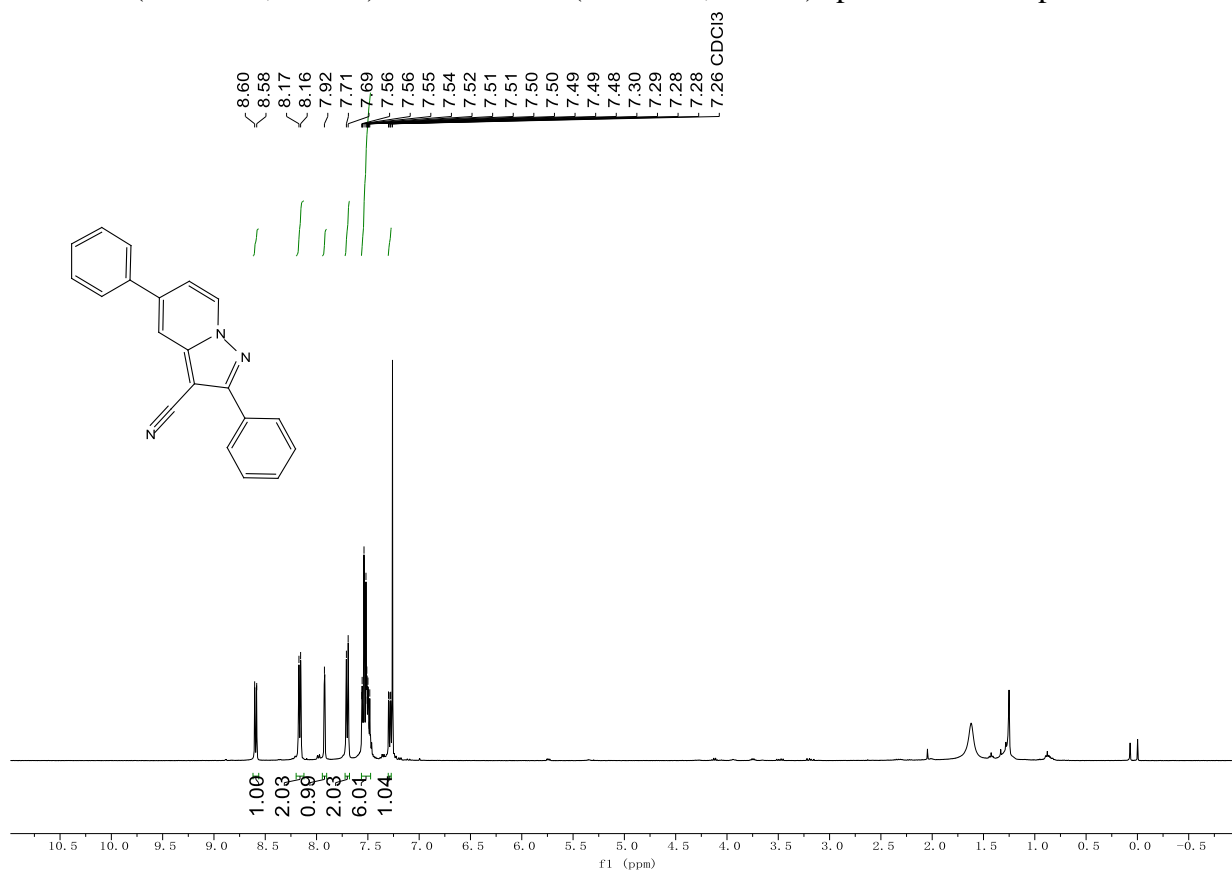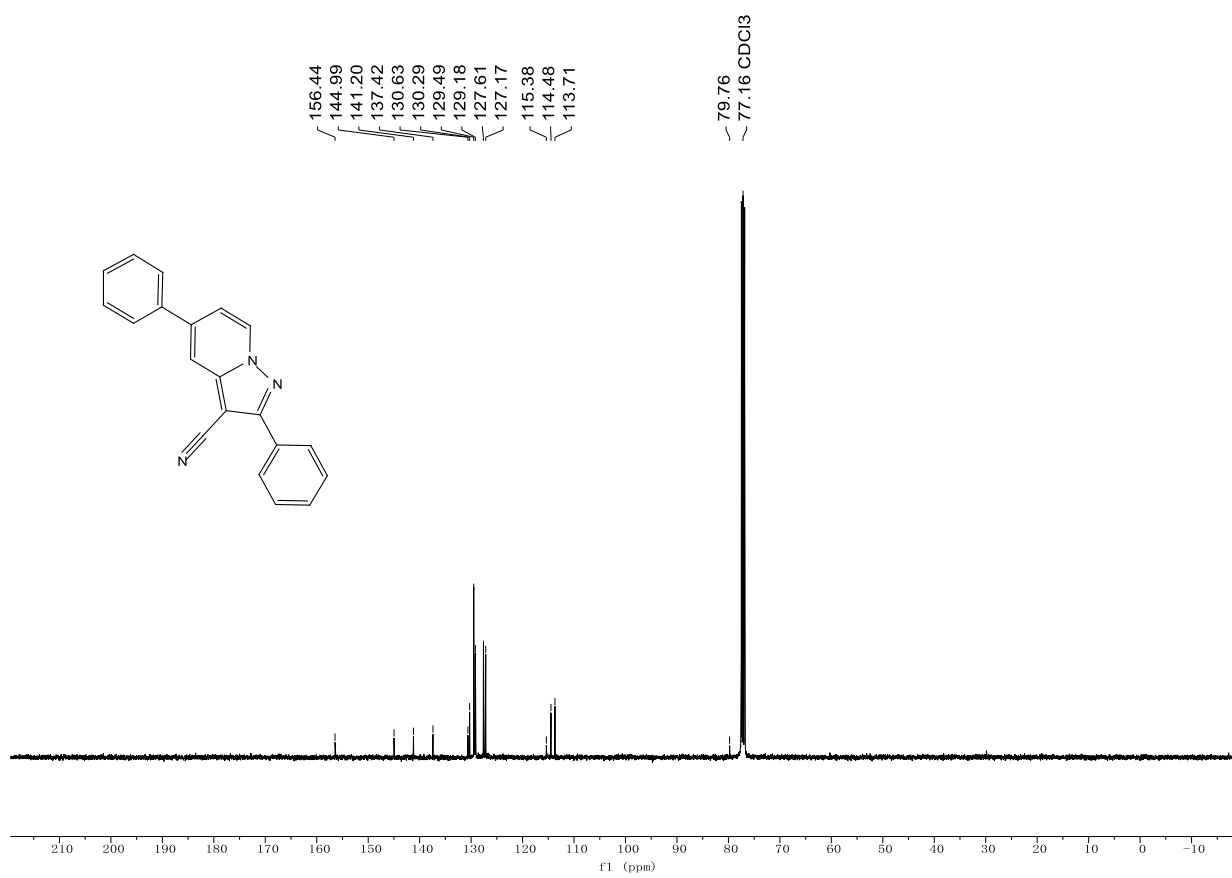

$^1\text{H}$  NMR (400 MHz,  $\text{CDCl}_3$ ) and  $^{13}\text{C}$  NMR (100 MHz,  $\text{CDCl}_3$ ) spectrum of compound **3j**

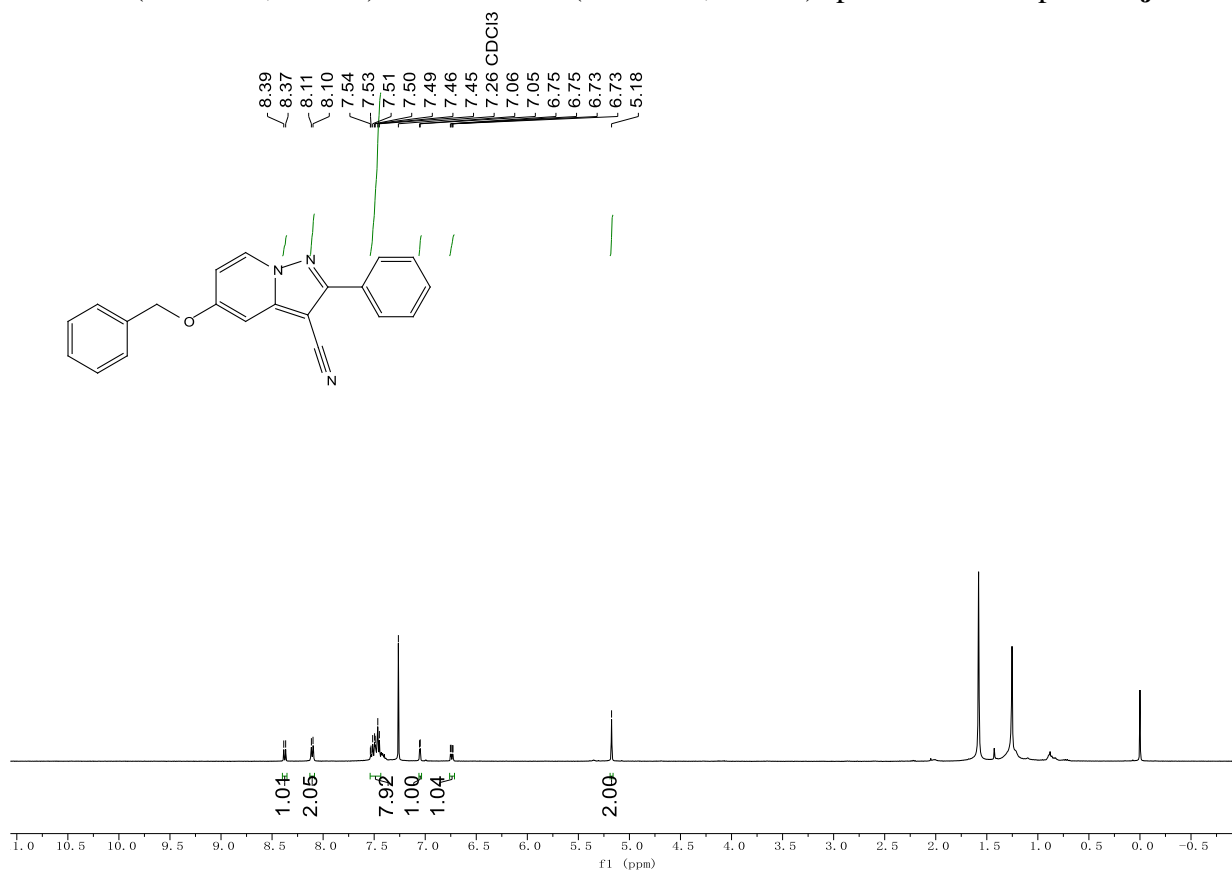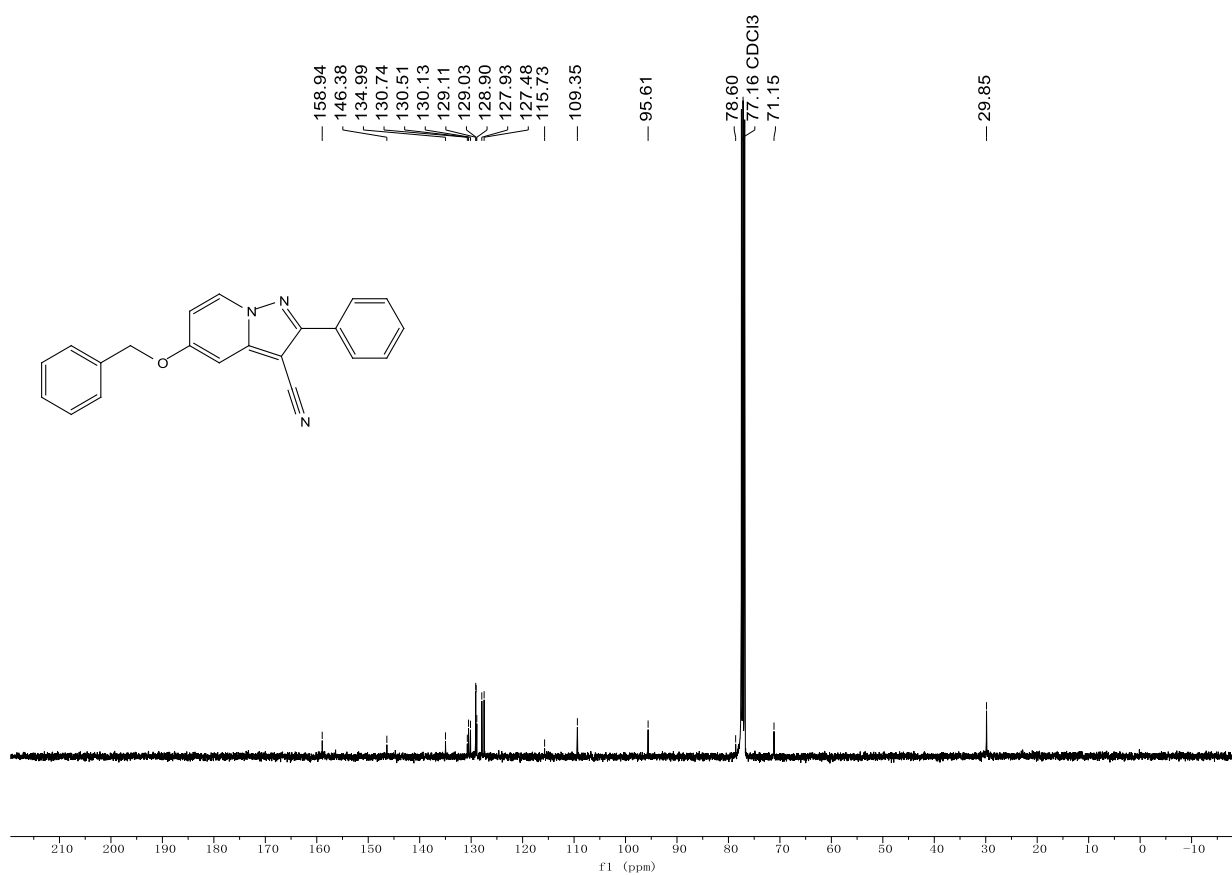

$^1\text{H}$  NMR (400 MHz,  $\text{CDCl}_3$ ) and  $^{13}\text{C}$  NMR (100 MHz,  $\text{CDCl}_3$ ) spectrum of compound **3k**

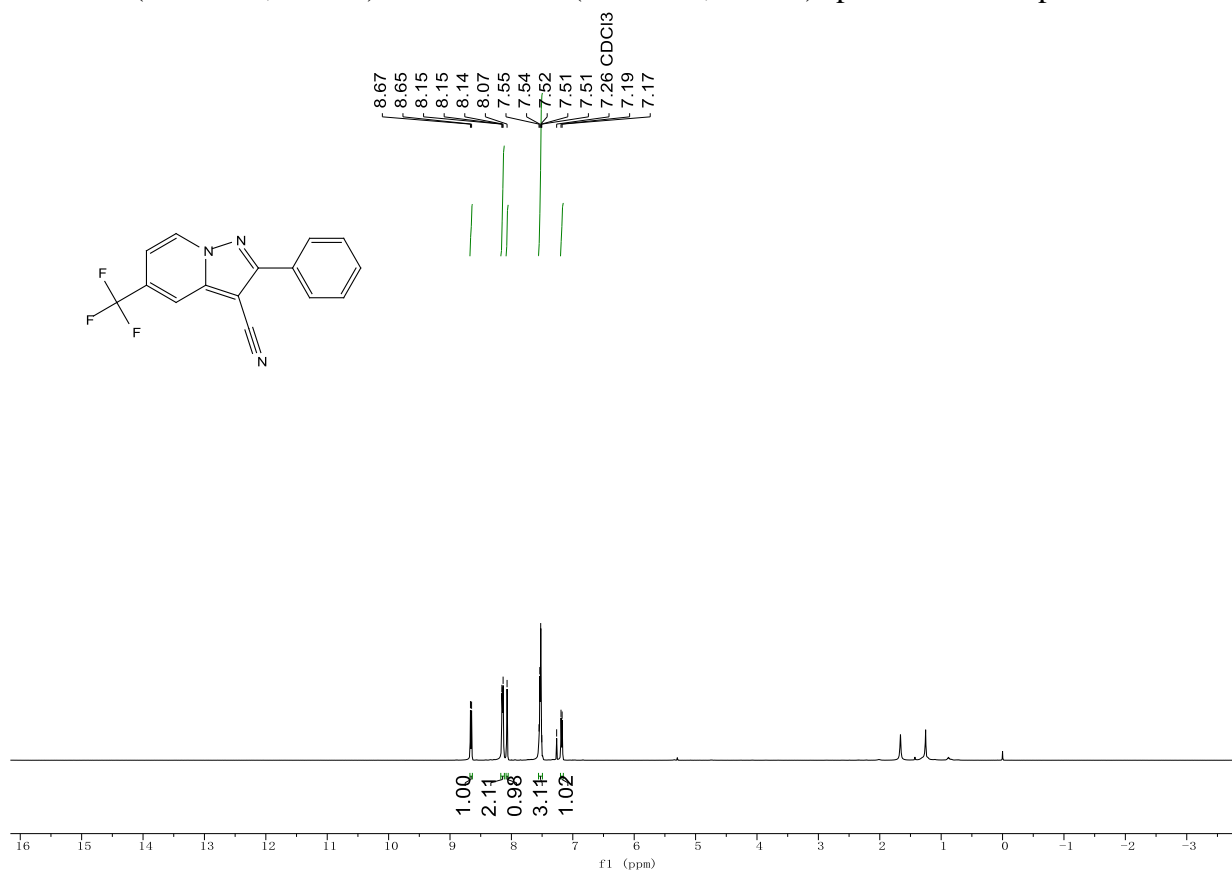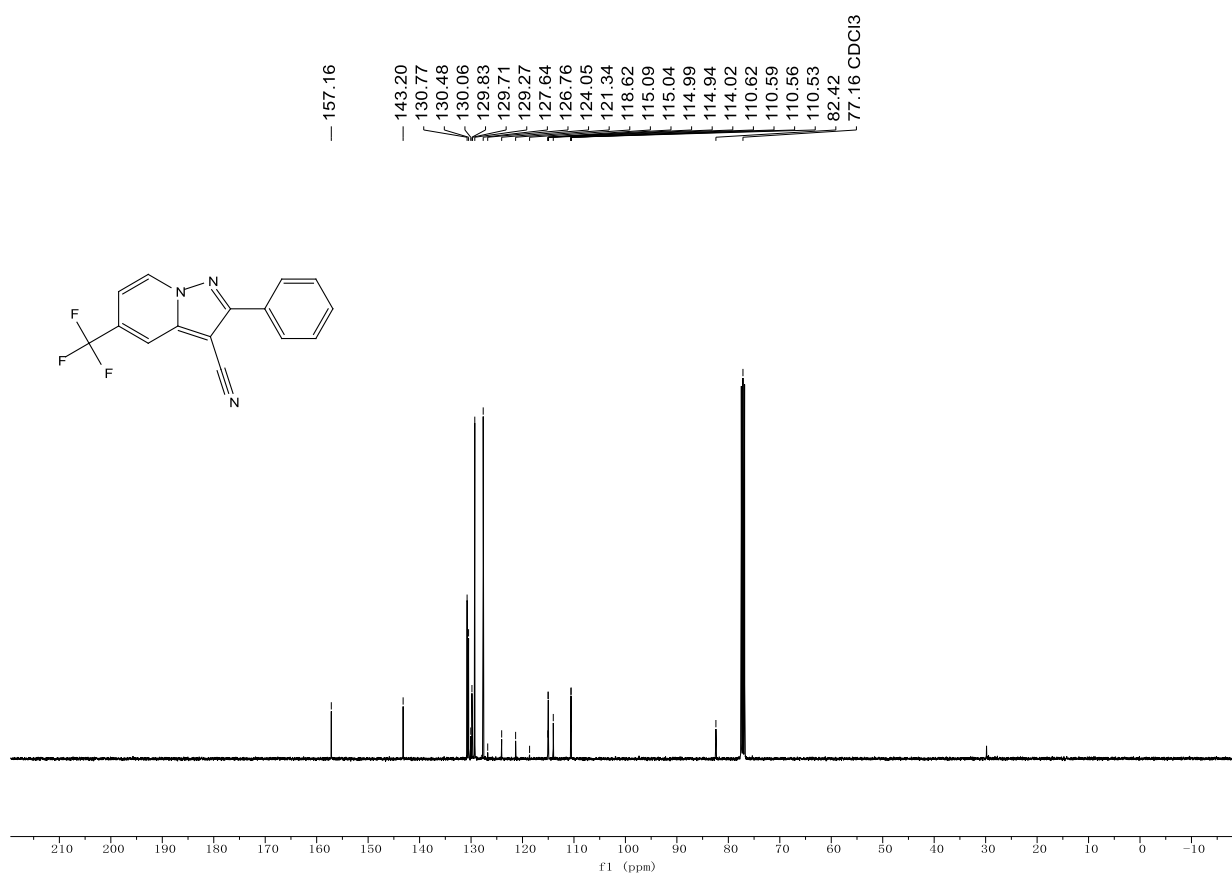

$^1\text{H}$  NMR (400 MHz,  $\text{CDCl}_3$ ) and  $^{13}\text{C}$  NMR (100 MHz,  $\text{CDCl}_3$ ) spectrum of compound **31**

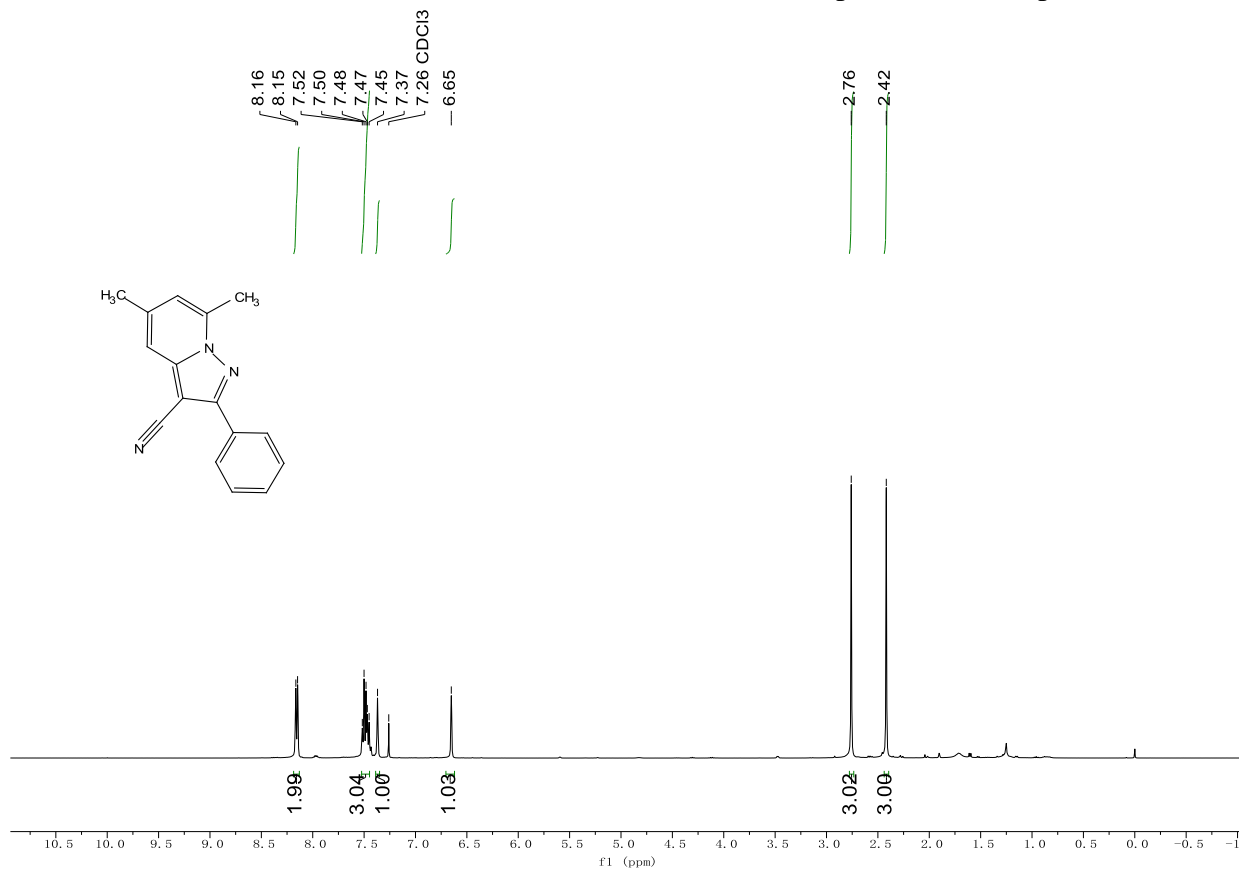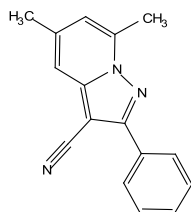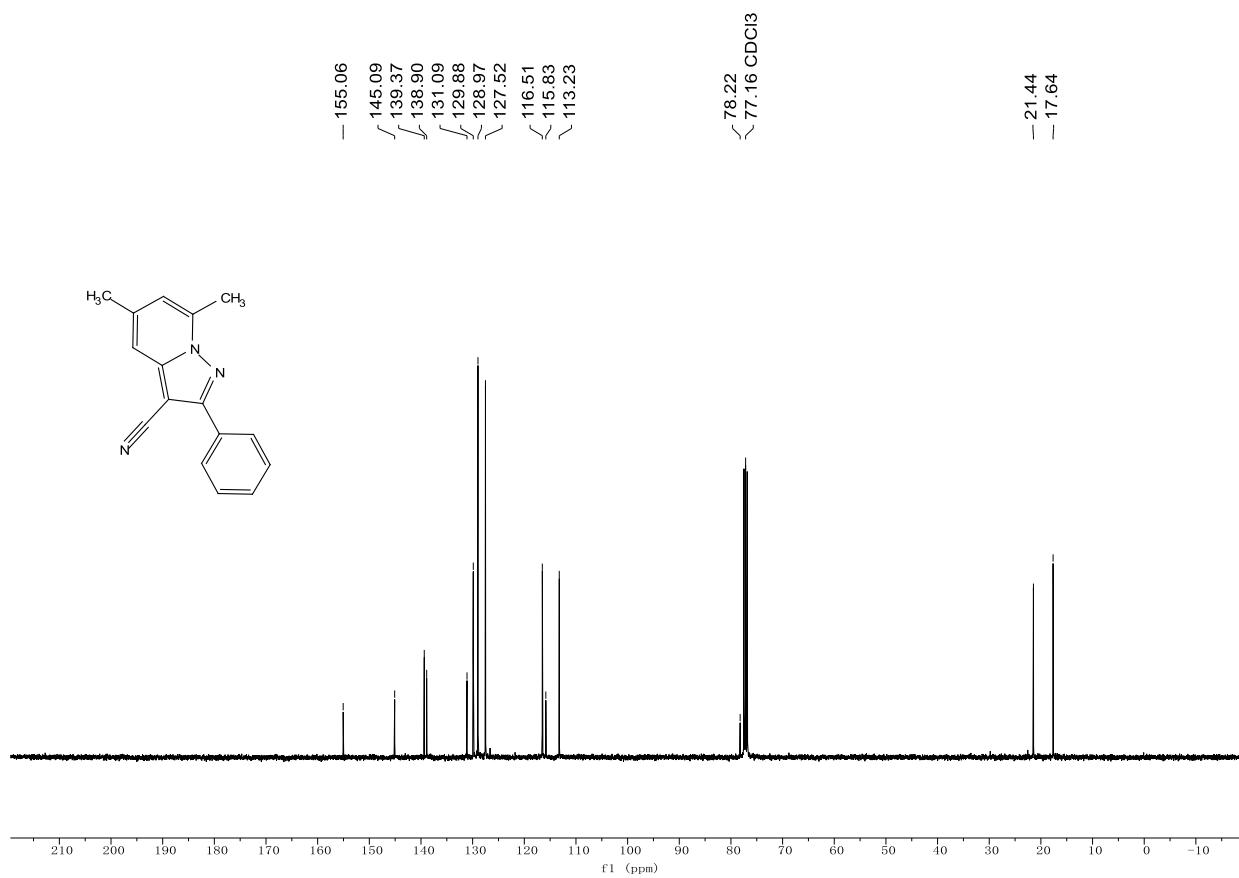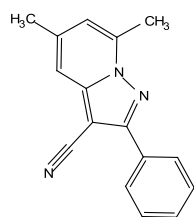

$^1\text{H}$  NMR (400 MHz,  $\text{CDCl}_3$ ) and  $^{13}\text{C}$  NMR (100 MHz,  $\text{CDCl}_3$ ) spectrum of compound **3m**

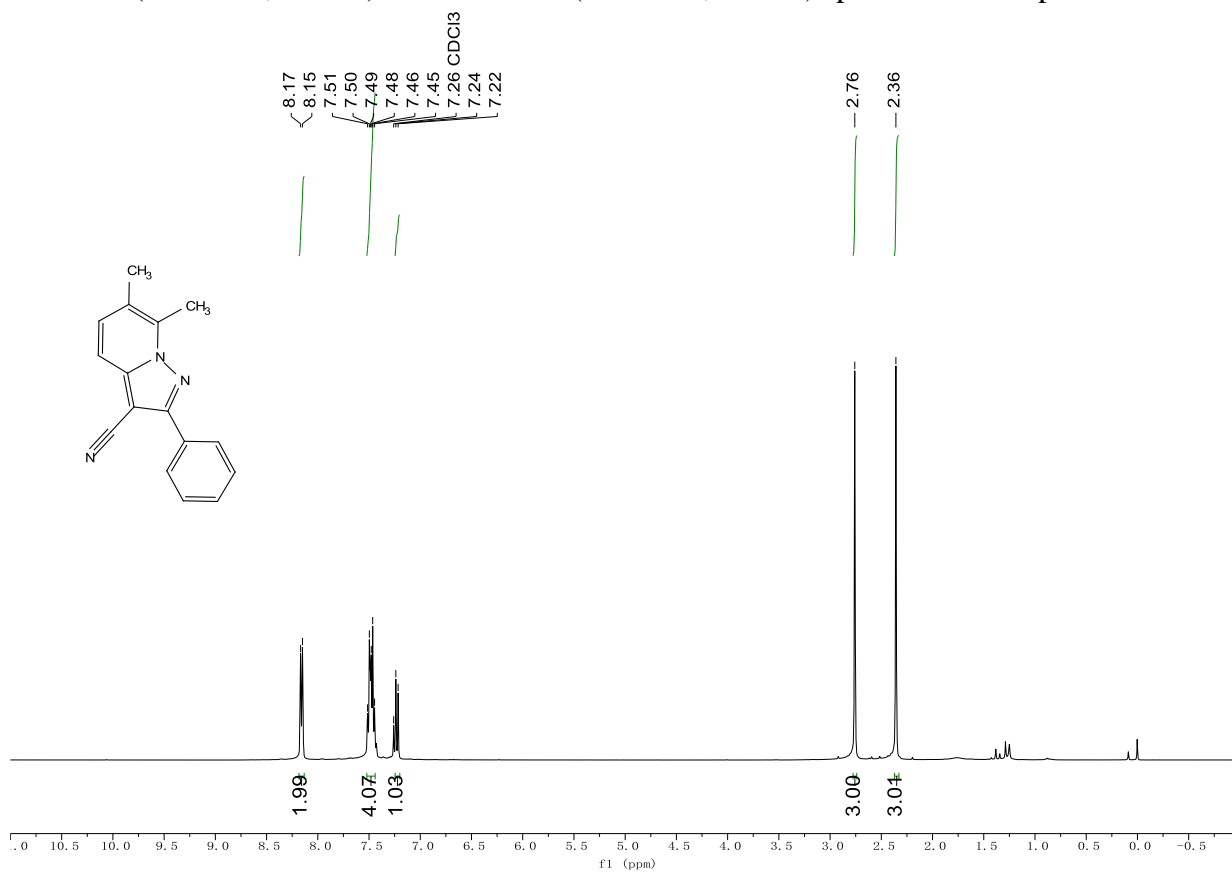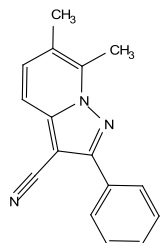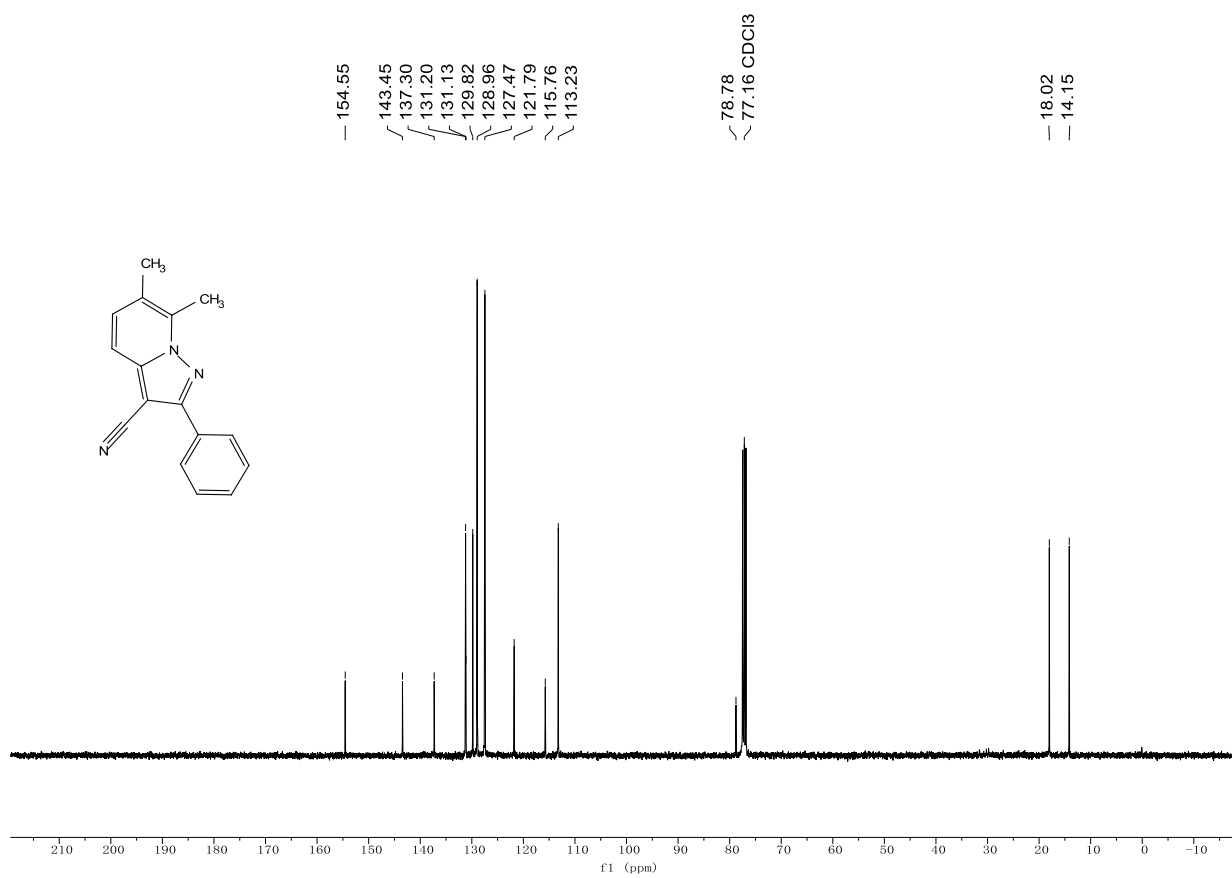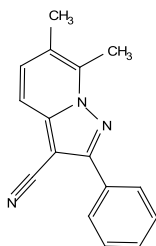

$^1\text{H}$  NMR (400 MHz,  $\text{CDCl}_3$ ) and  $^{13}\text{C}$  NMR (100 MHz,  $\text{CDCl}_3$ ) spectrum of compound **4a**

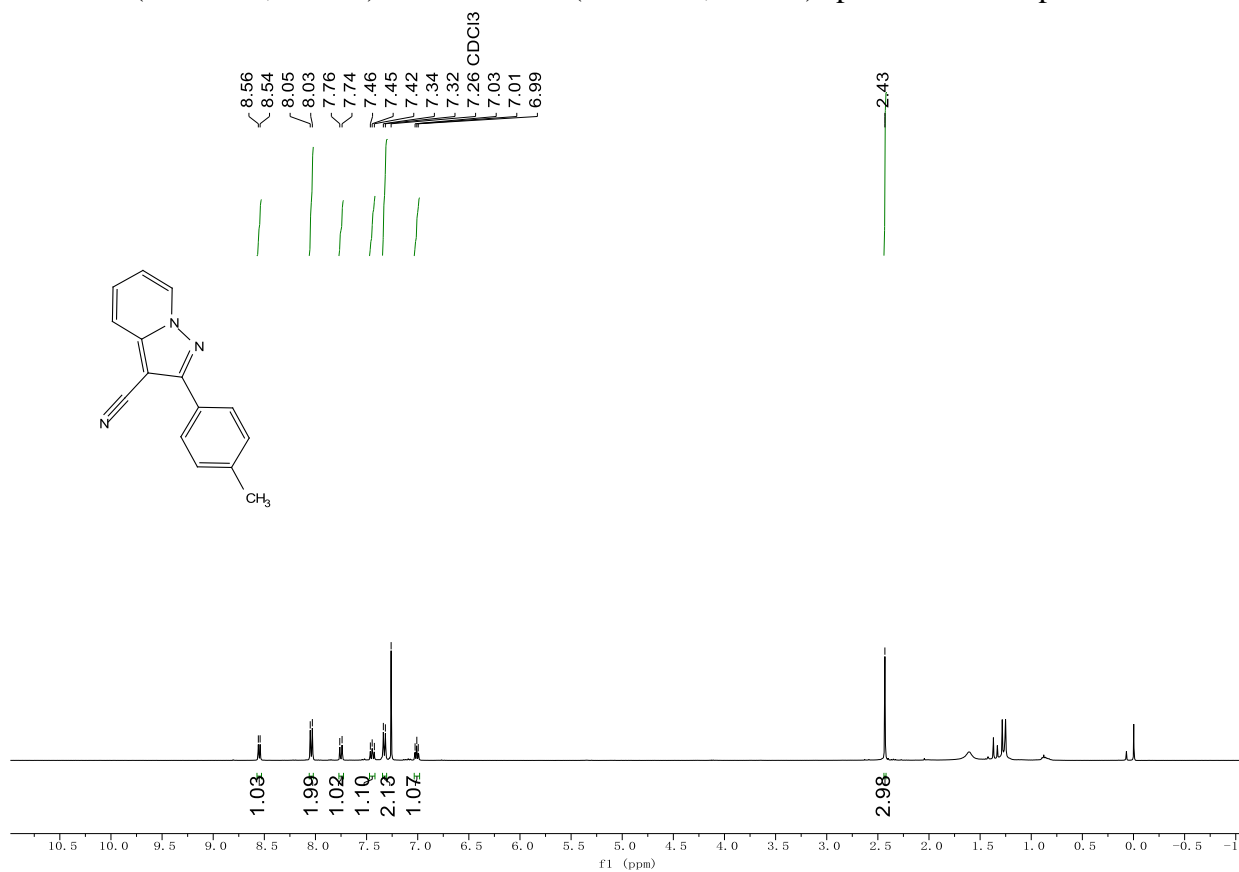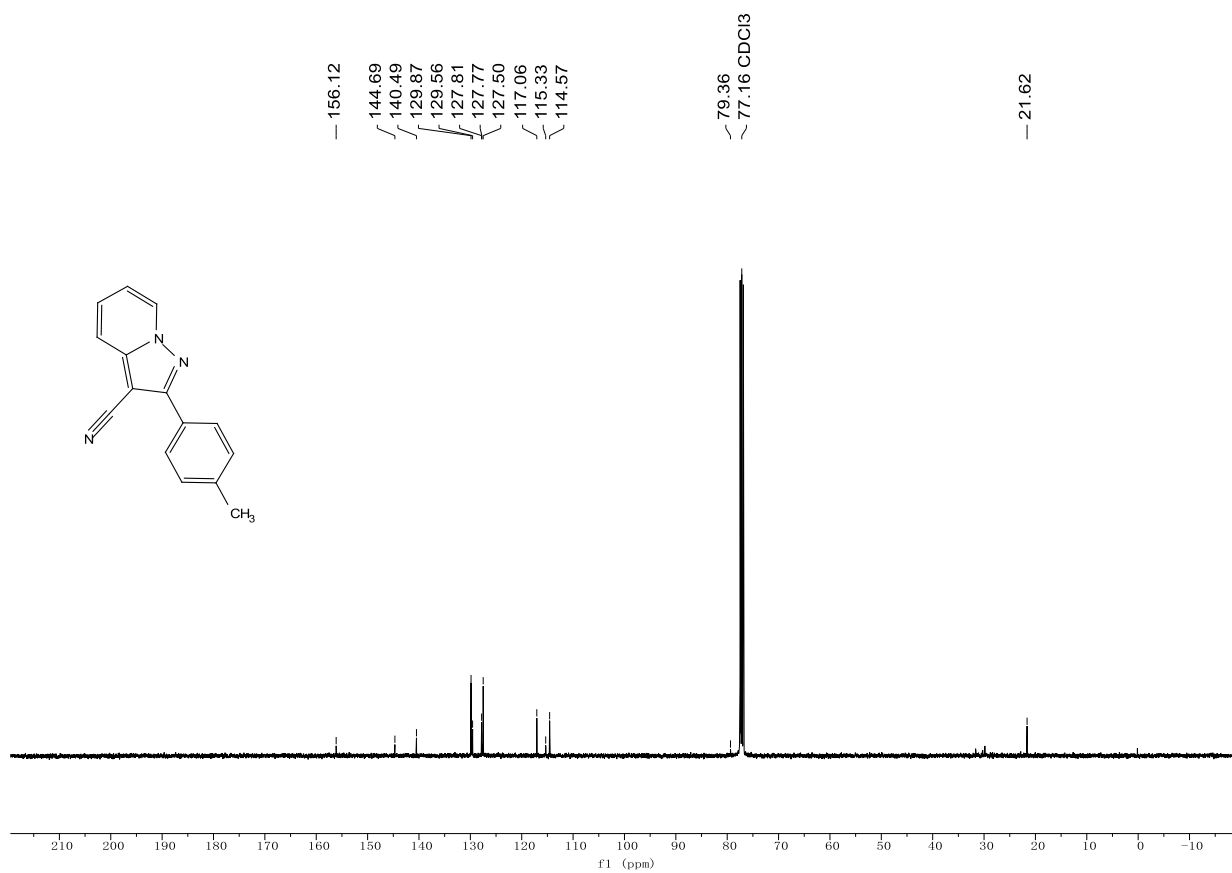

$^1\text{H}$  NMR (400 MHz,  $\text{CDCl}_3$ ) and  $^{13}\text{C}$  NMR (100 MHz,  $\text{CDCl}_3$ ) spectrum of compound **4b**

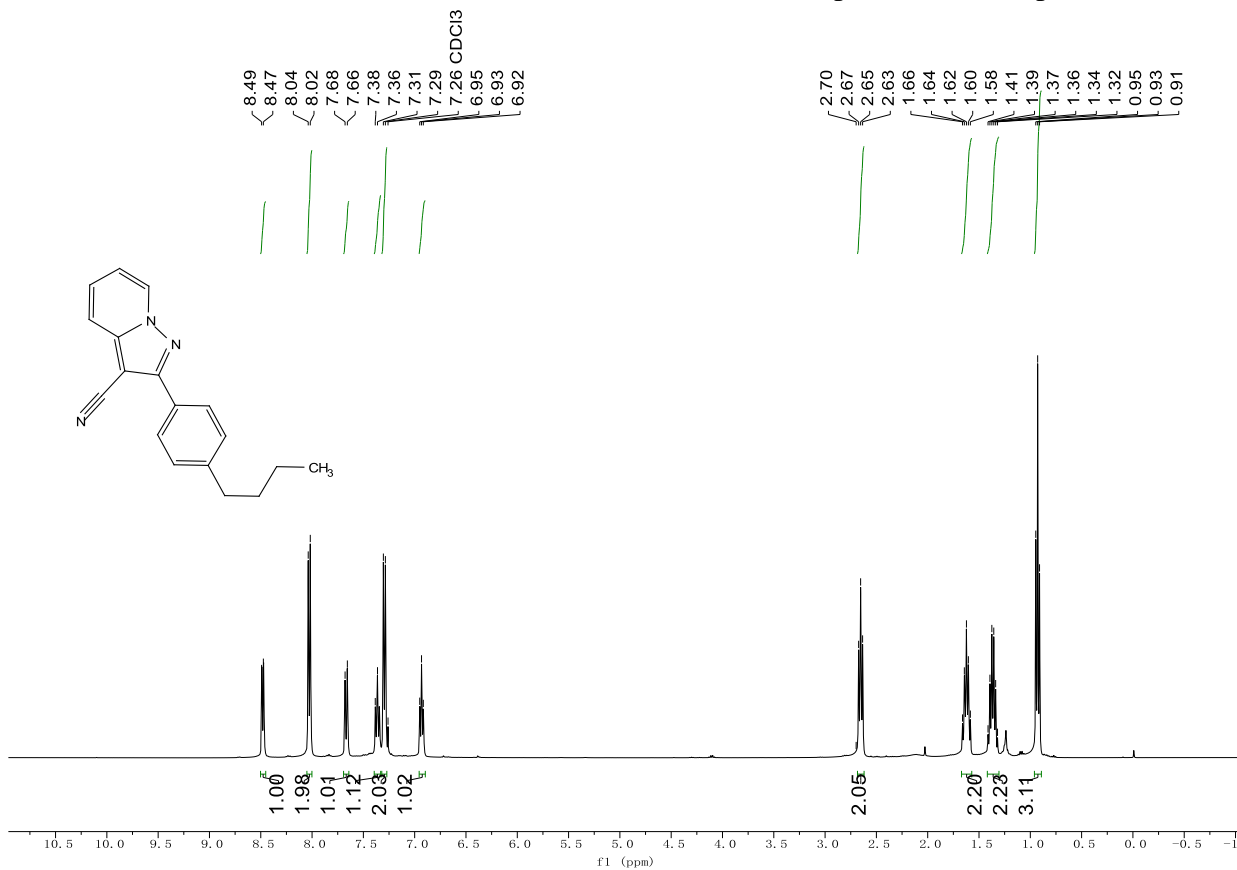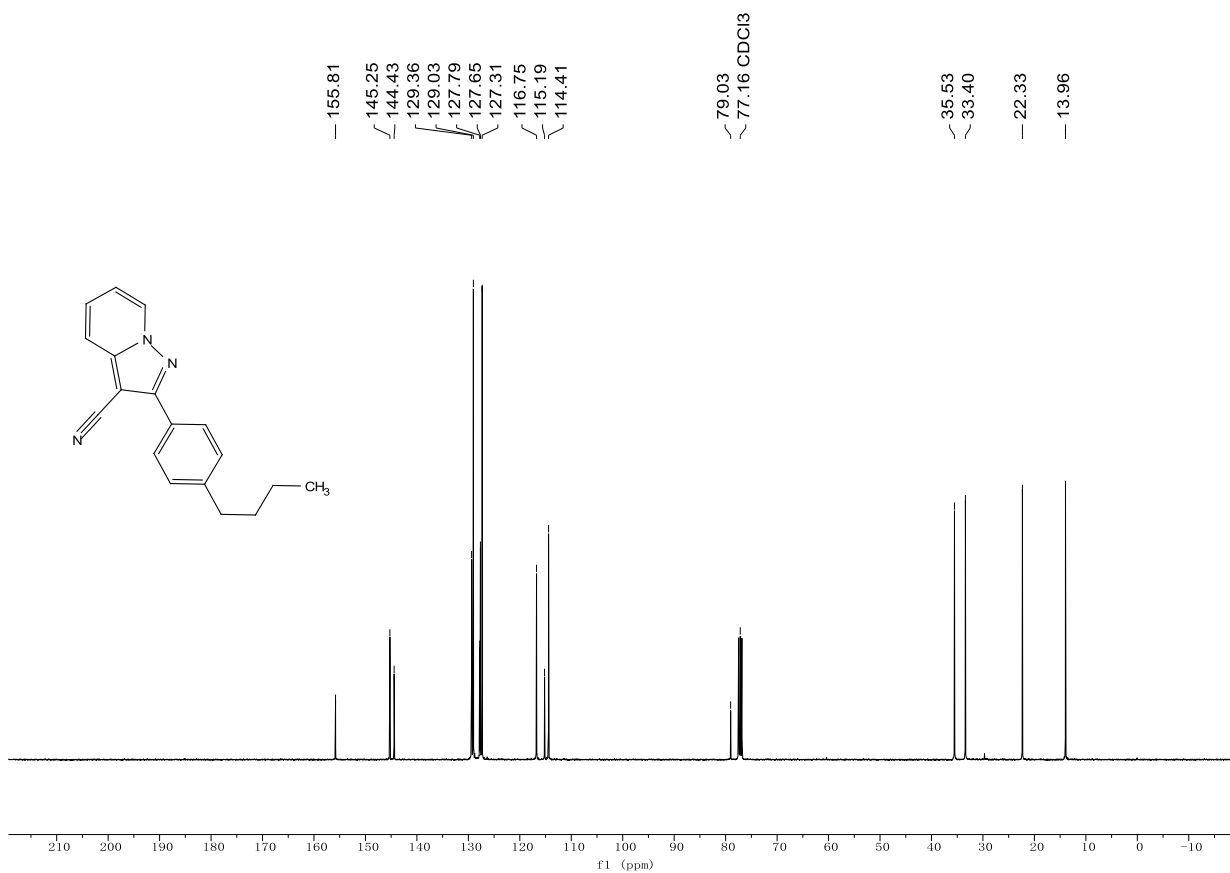

$^1\text{H}$  NMR (400 MHz,  $\text{CDCl}_3$ ) and  $^{13}\text{C}$  NMR (100 MHz,  $\text{CDCl}_3$ ) spectrum of compound **4c**

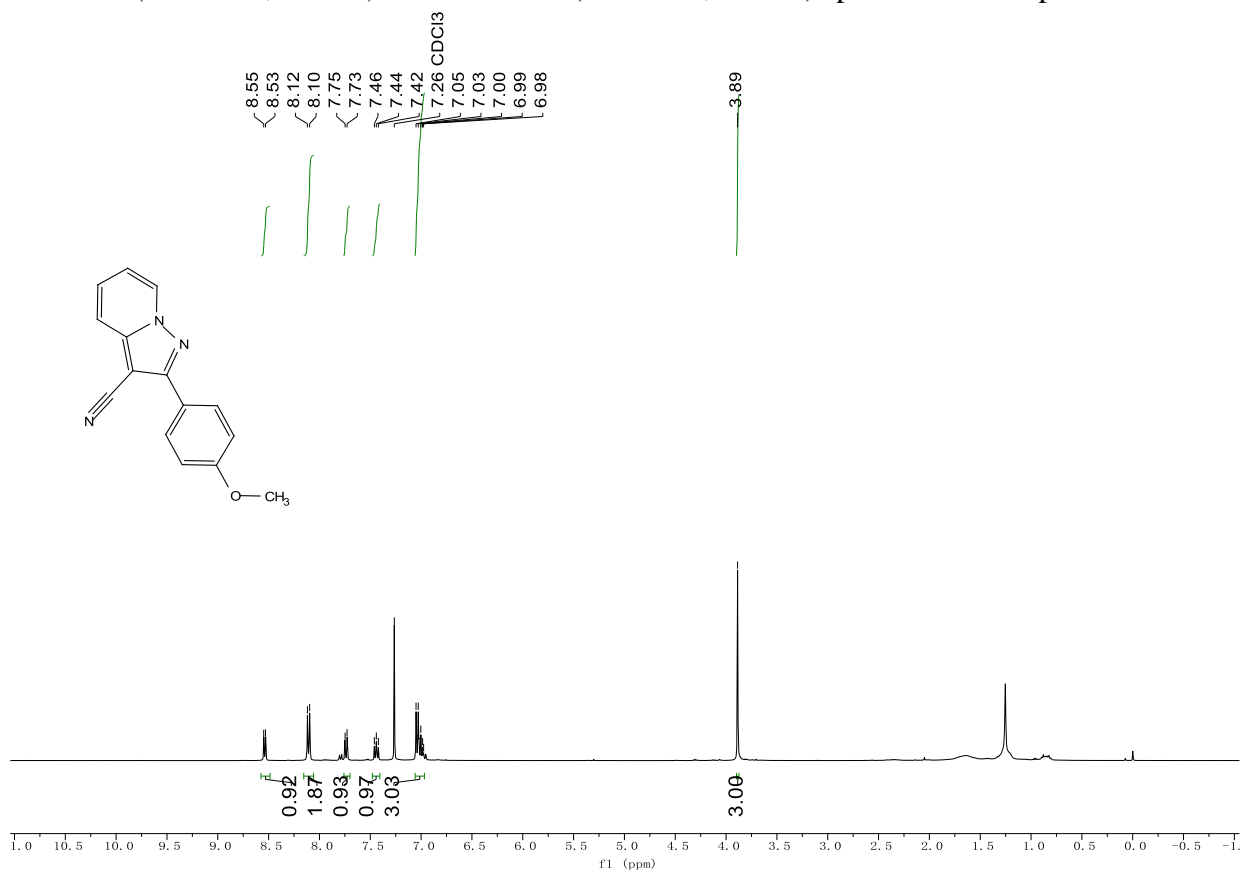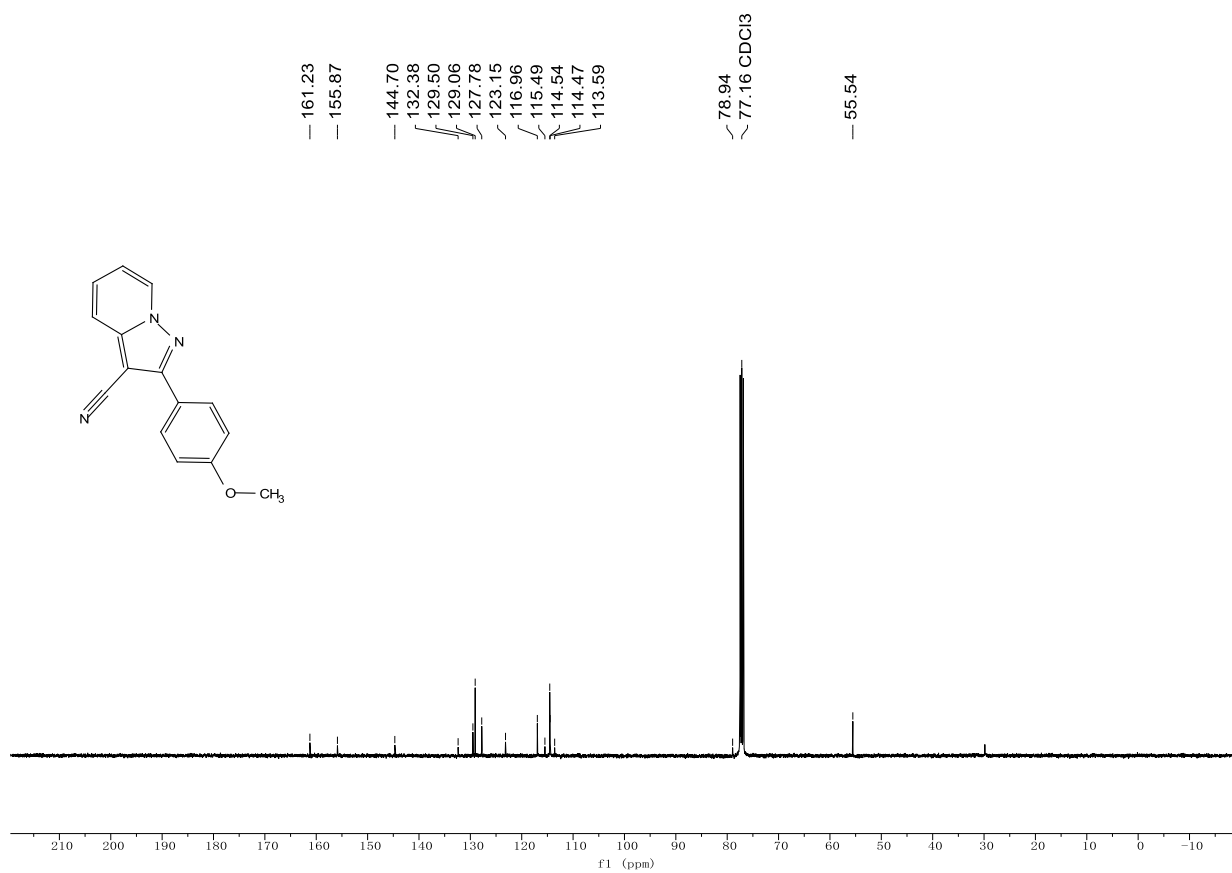



$^1\text{H}$  NMR (400 MHz,  $\text{CDCl}_3$ ) and  $^{13}\text{C}$  NMR (100 MHz,  $\text{CDCl}_3$ ) spectrum of compound **4d**

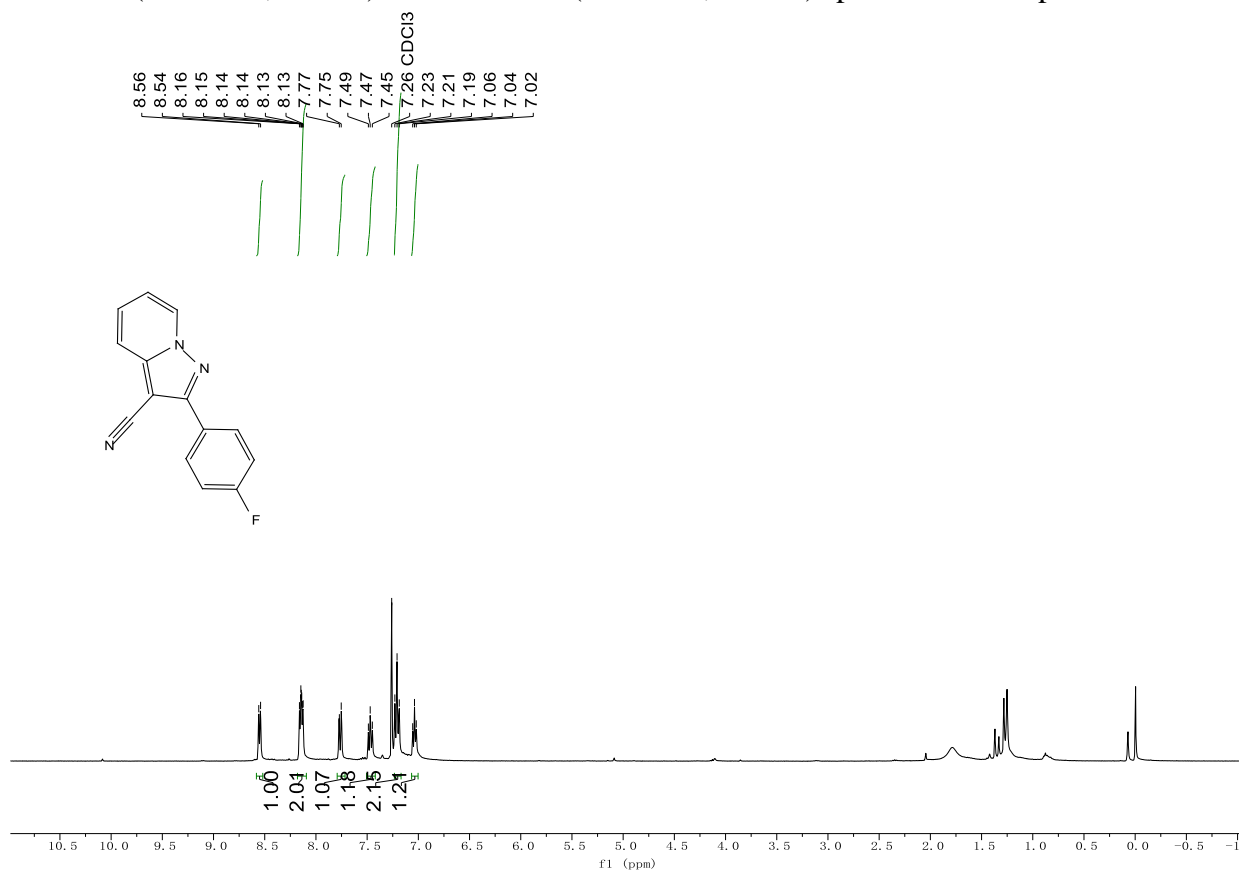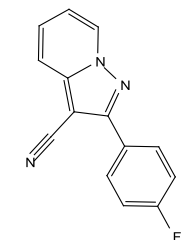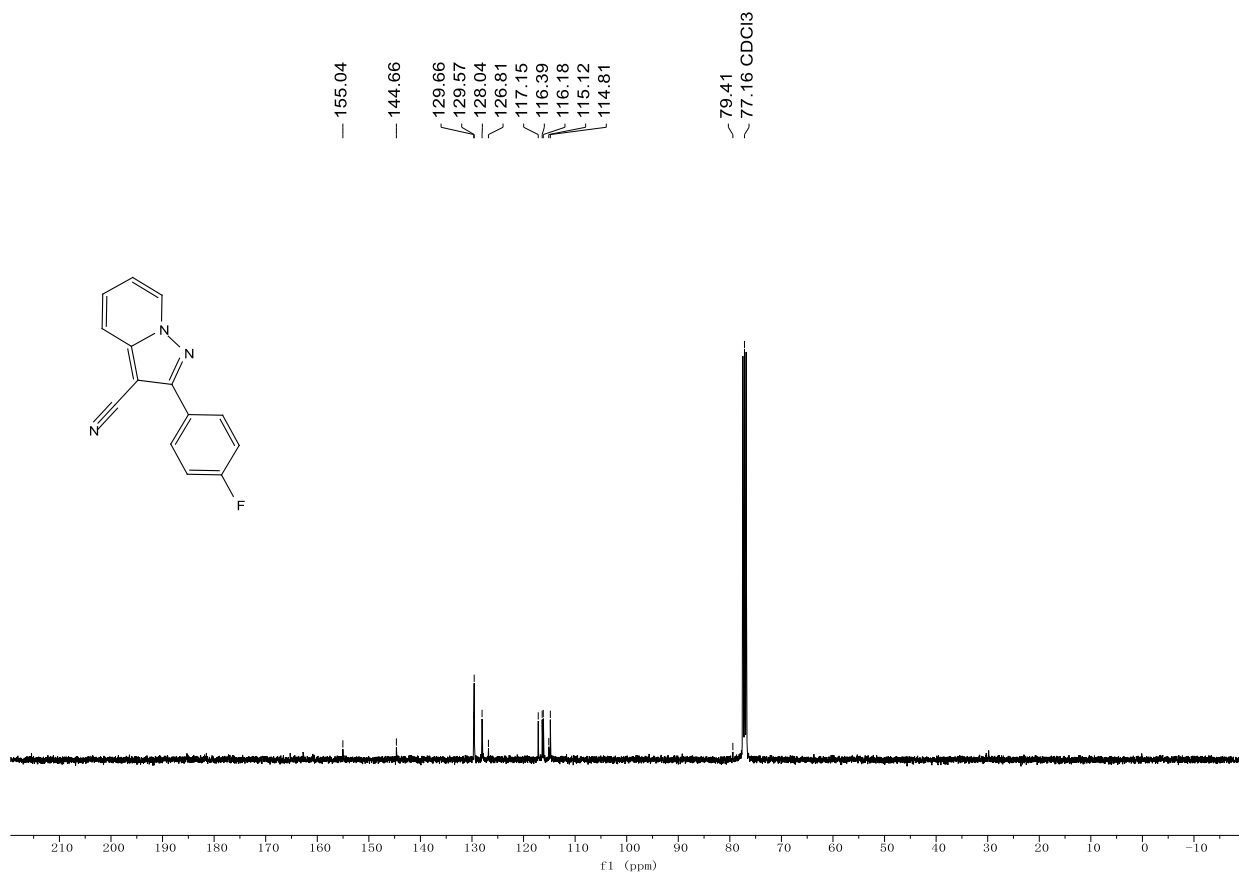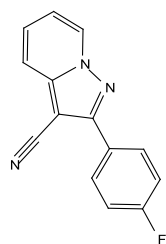

$^1\text{H}$  NMR (400 MHz,  $\text{CDCl}_3$ ) and  $^{13}\text{C}$  NMR (100 MHz,  $\text{CDCl}_3$ ) spectrum of compound **4e**

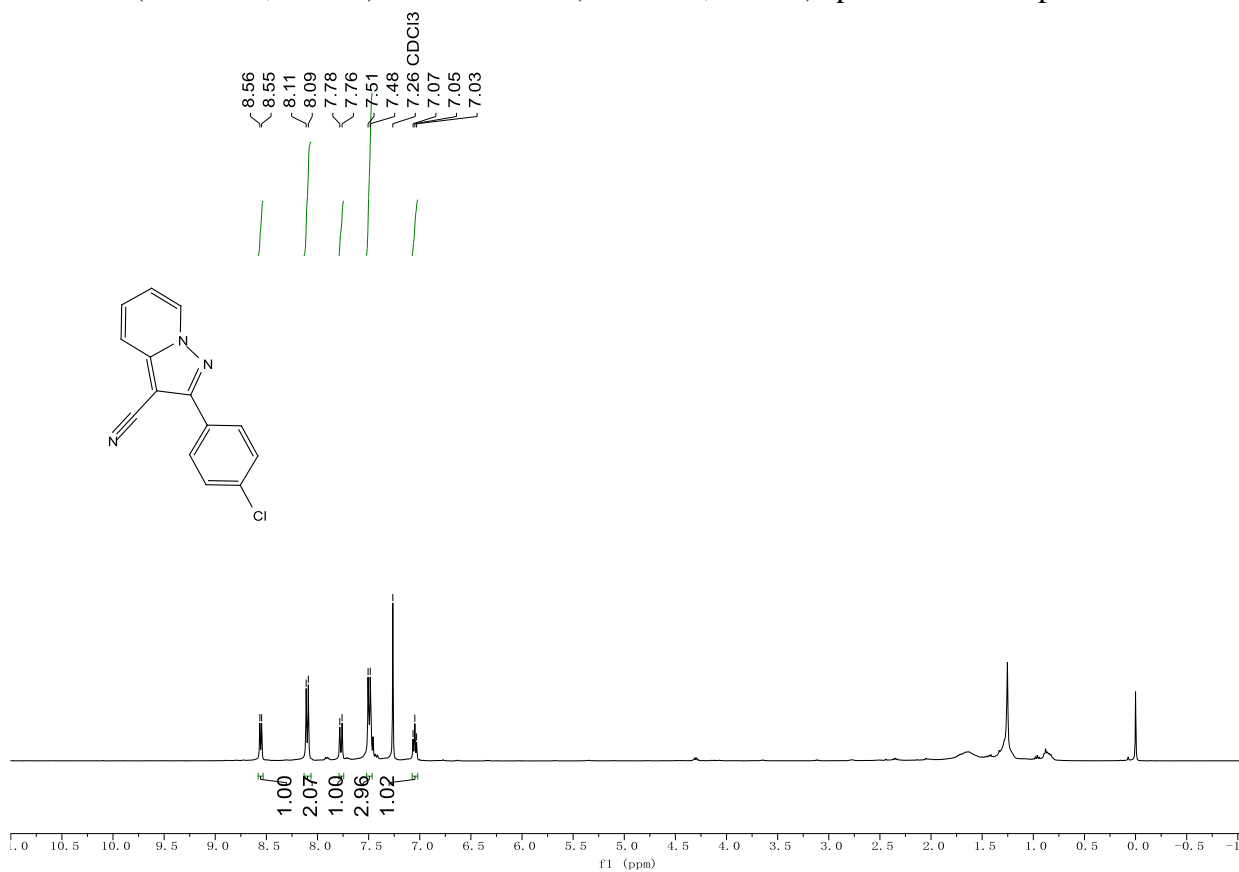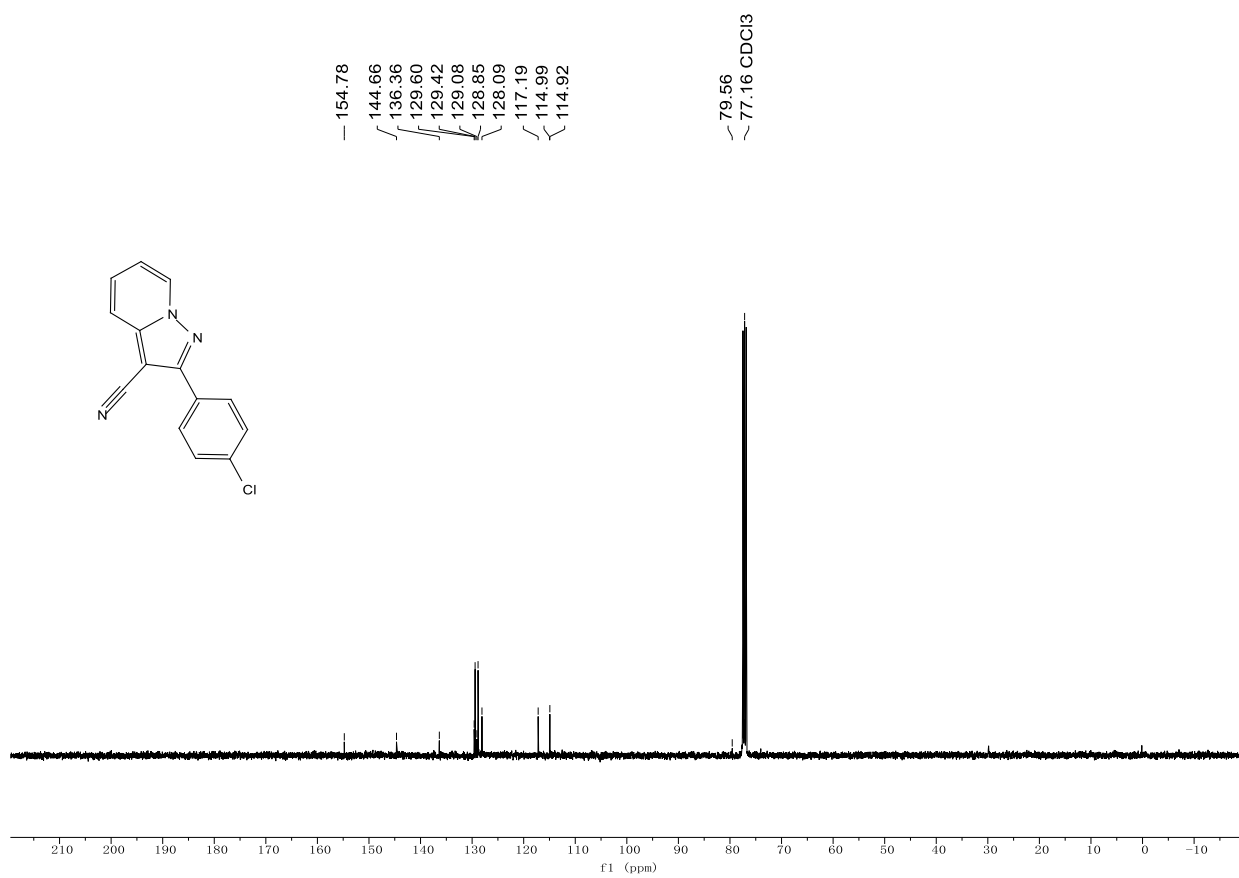

<sup>1</sup>H NMR (400 MHz, DMSO-d<sub>6</sub>) and <sup>13</sup>C NMR (100 MHz, DMSO-d<sub>6</sub>) spectrum of compound **4f**

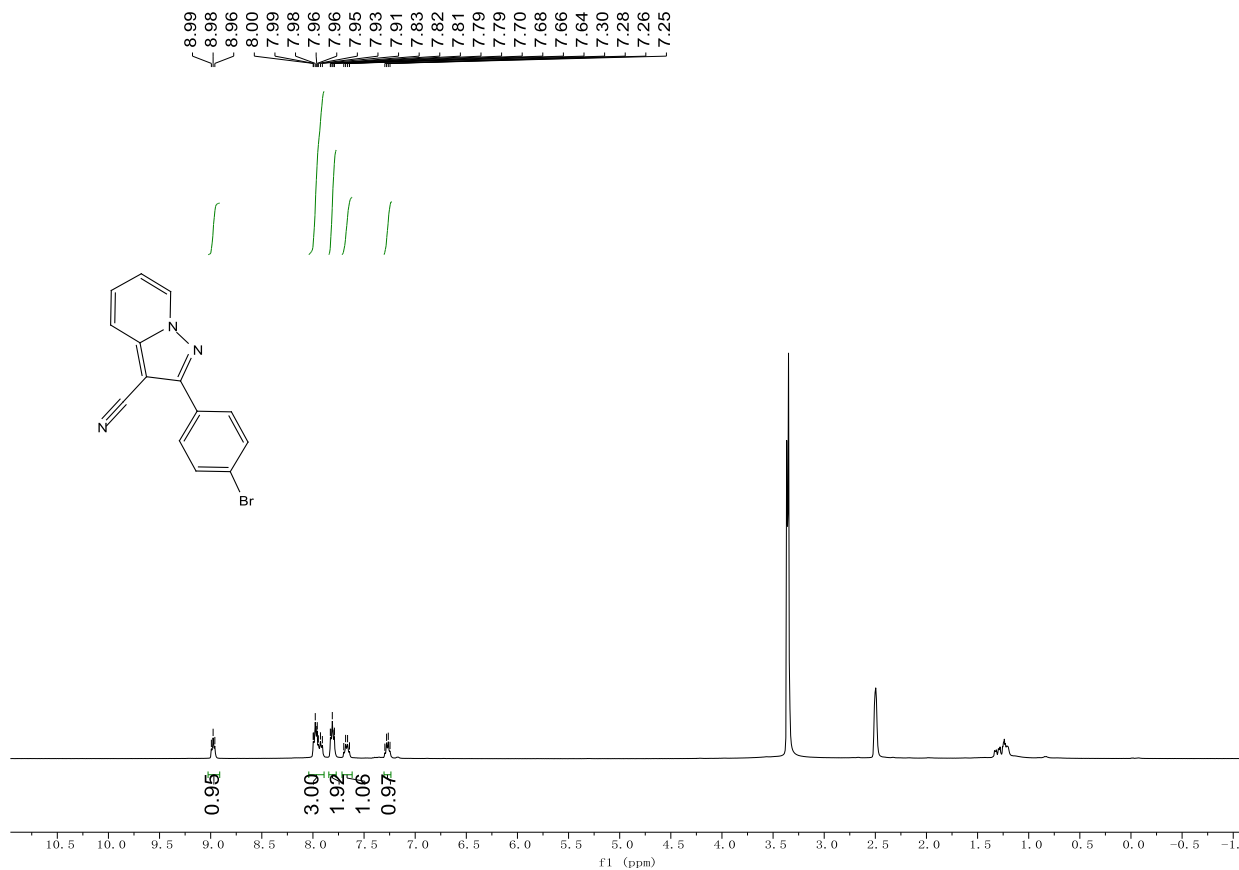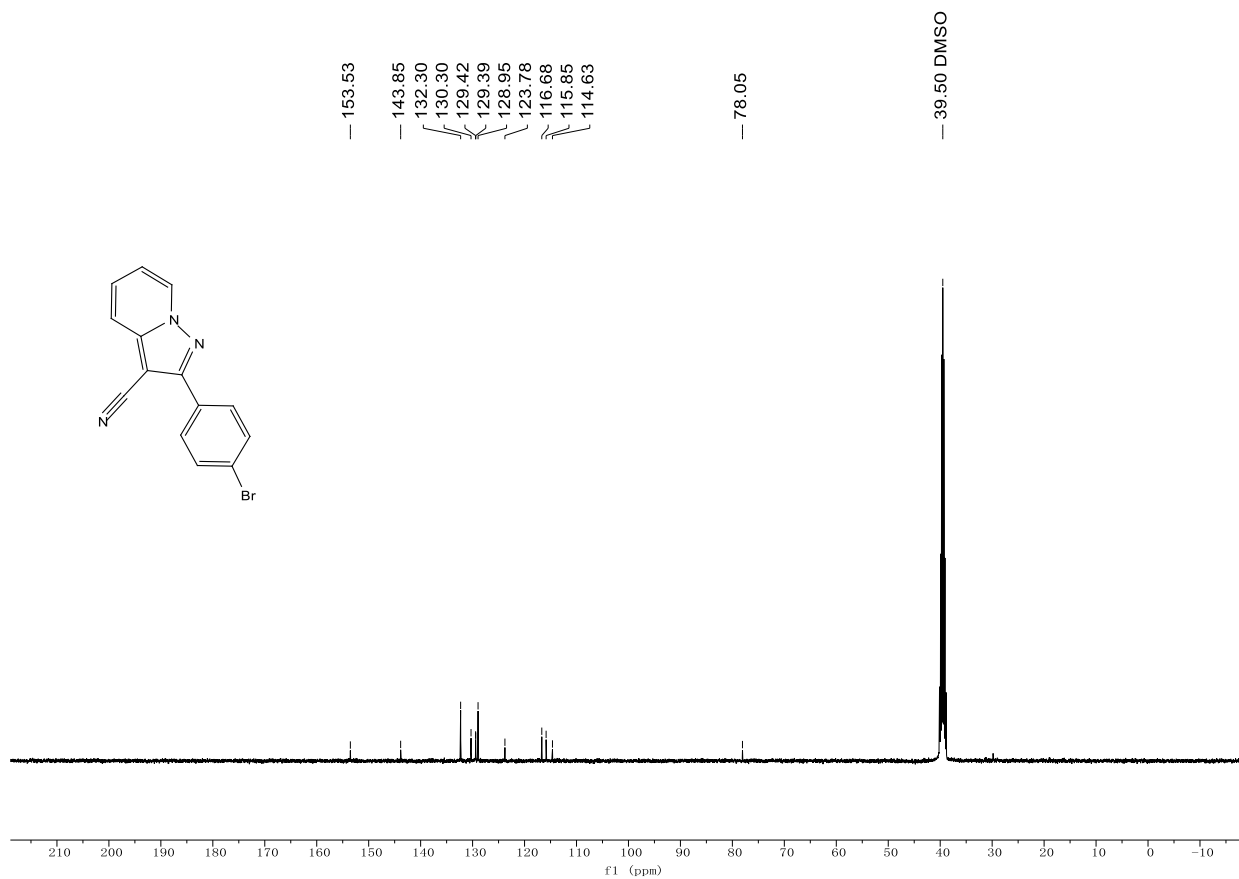

$^1\text{H}$  NMR (400 MHz,  $\text{CDCl}_3$ ) and  $^{13}\text{C}$  NMR (100 MHz,  $\text{CDCl}_3$ ) spectrum of compound **4g**

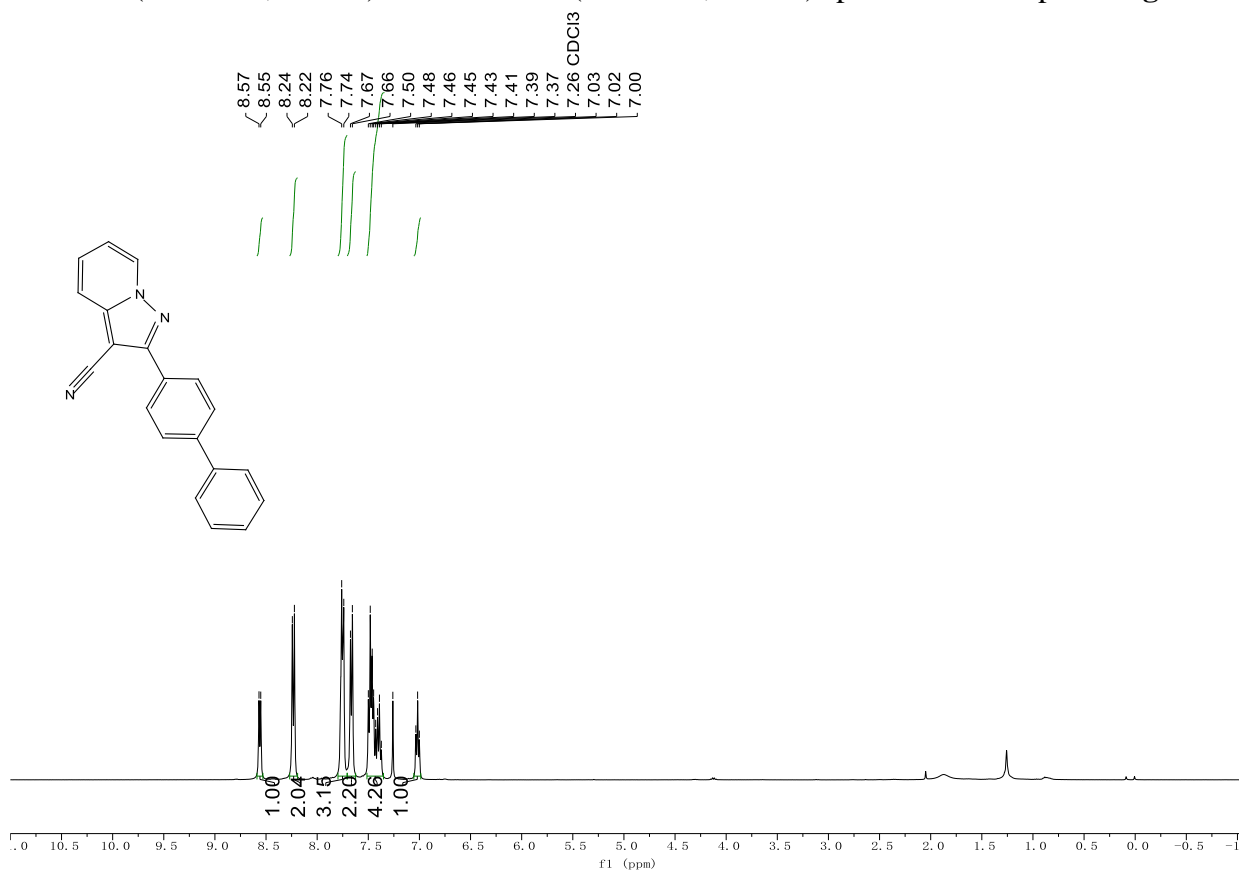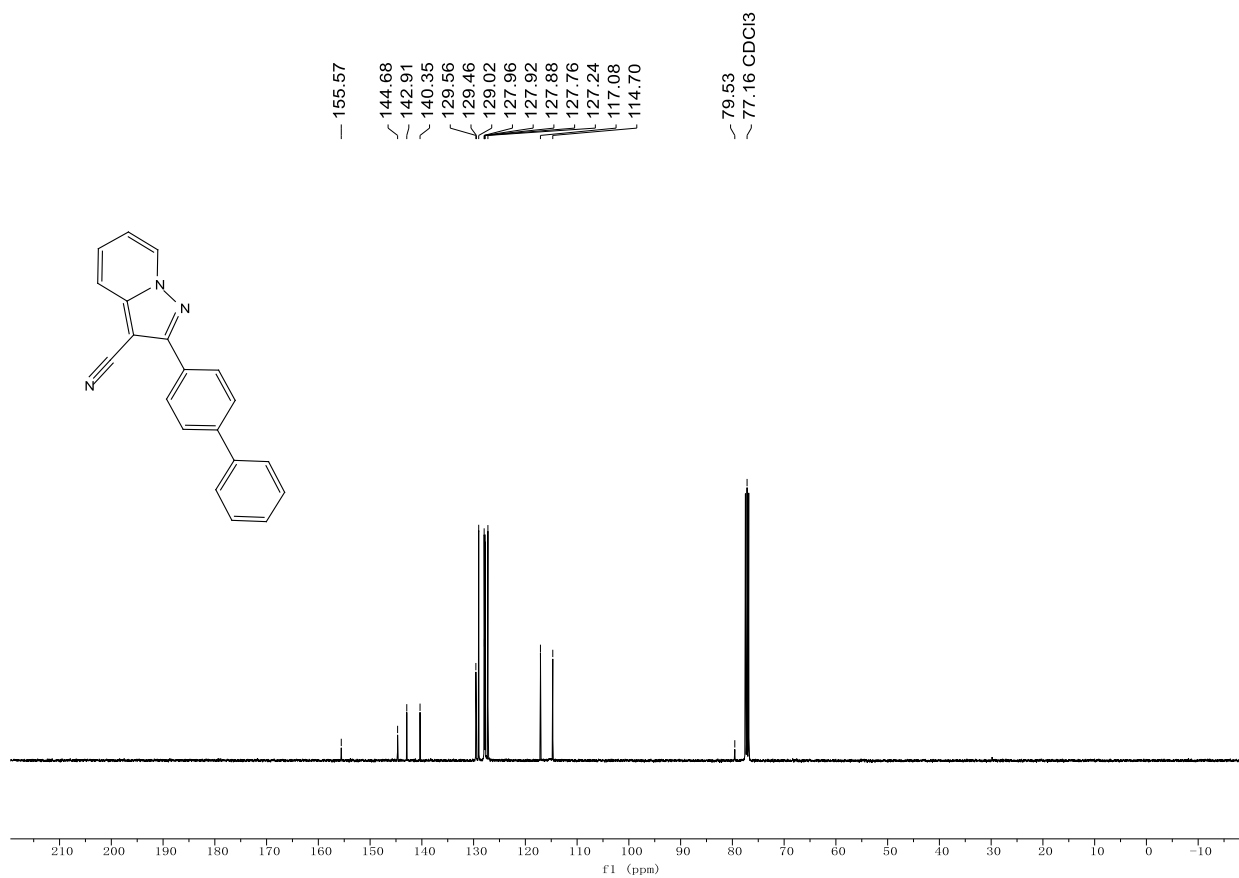

$^1\text{H}$  NMR (400 MHz,  $\text{CDCl}_3$ ) and  $^{13}\text{C}$  NMR (100 MHz,  $\text{CDCl}_3$ ) spectrum of compound **4h**

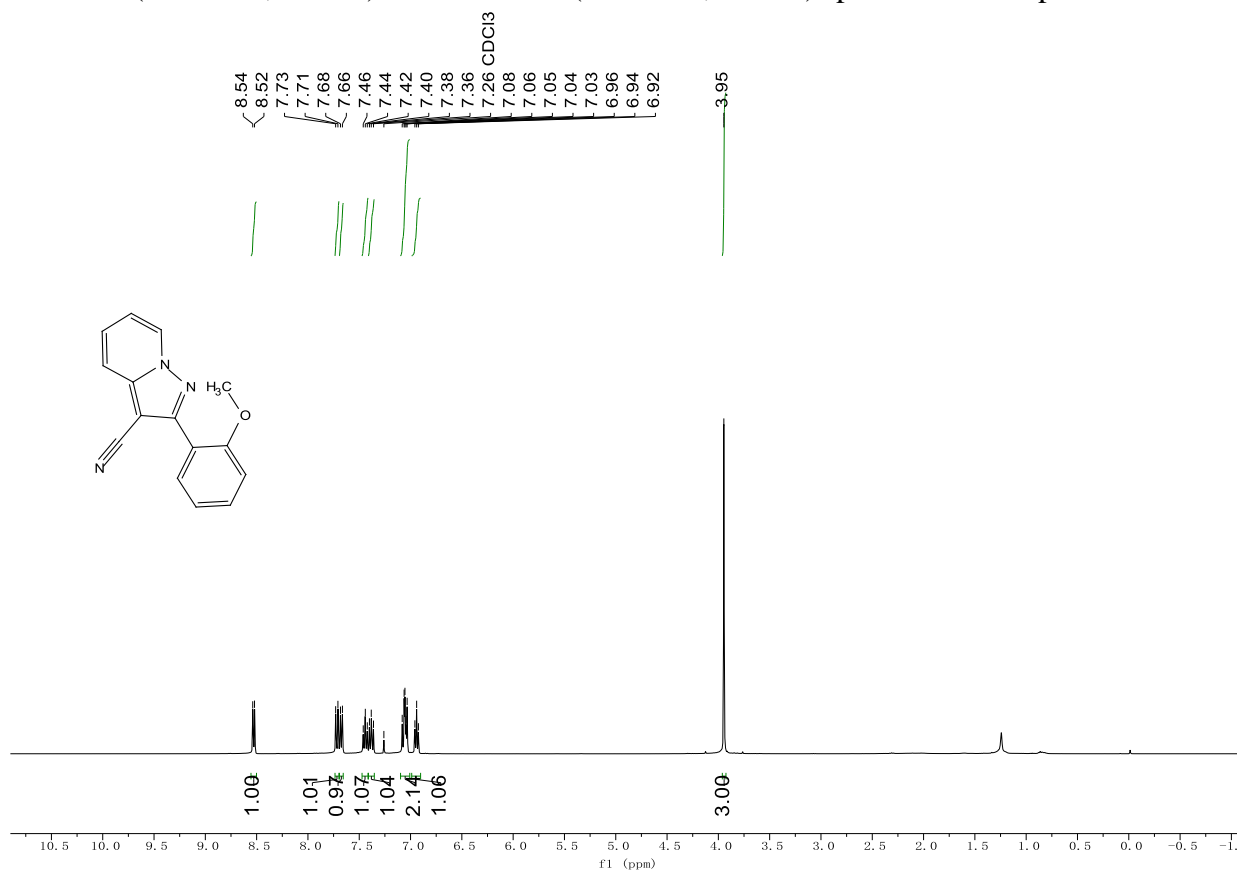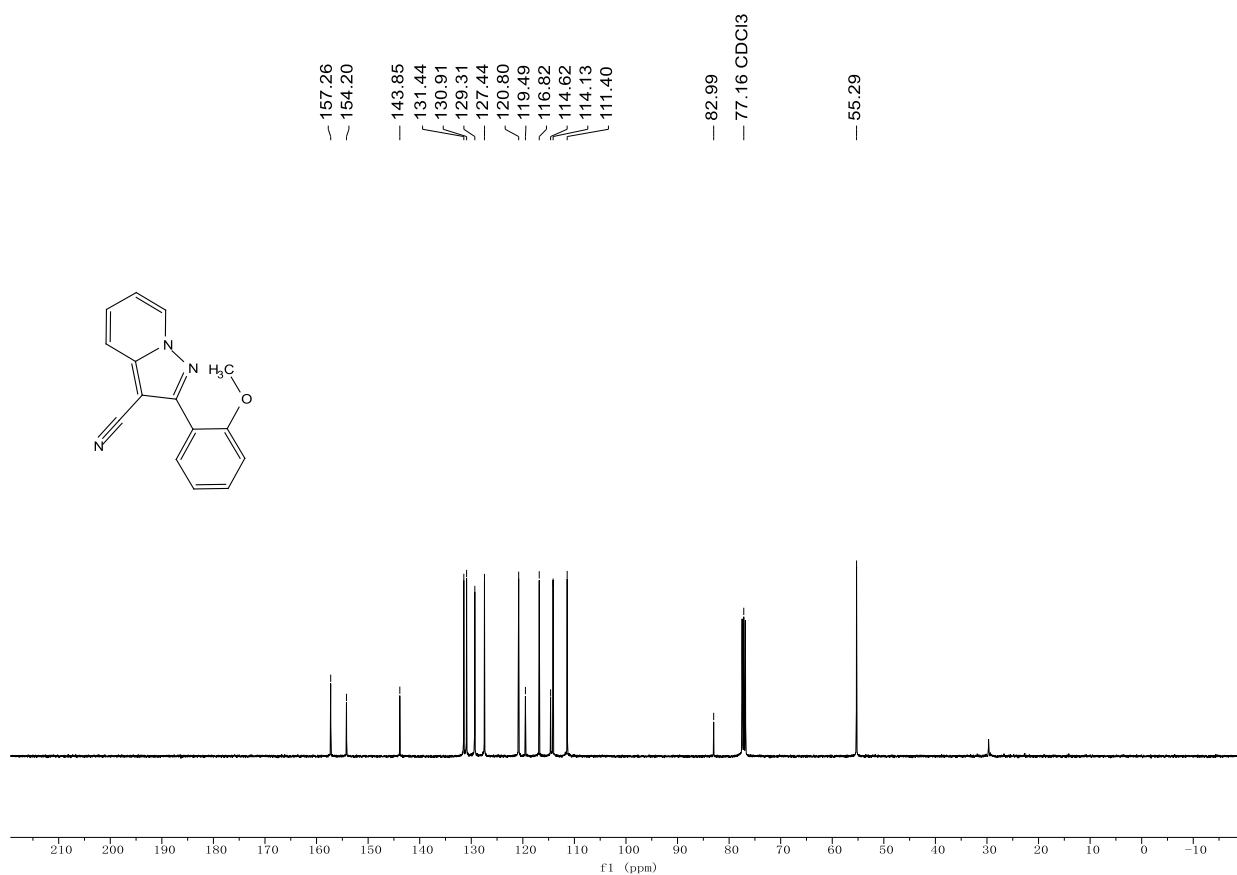

$^1\text{H}$  NMR (400 MHz,  $\text{CDCl}_3$ ) and  $^{13}\text{C}$  NMR (100 MHz,  $\text{CDCl}_3$ ) spectrum of compound **4i**

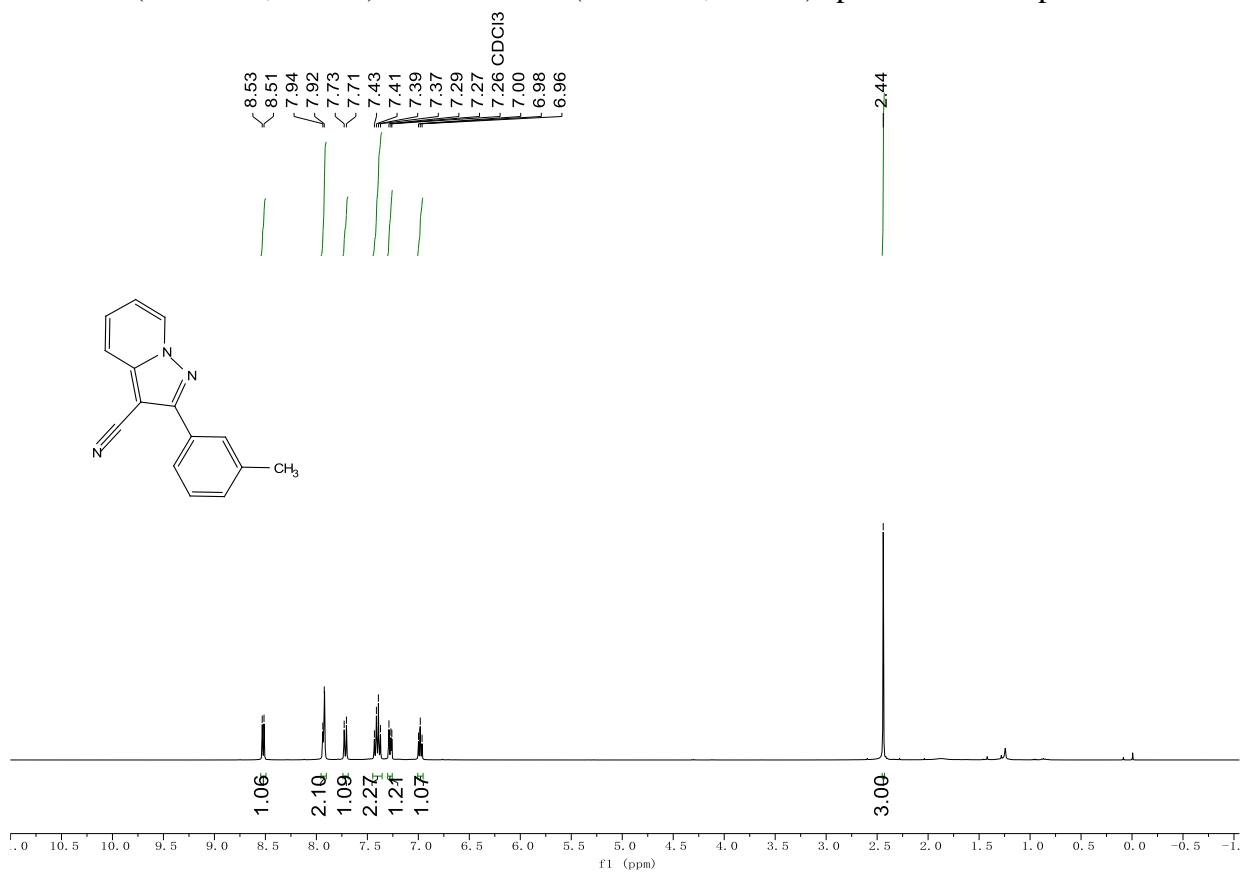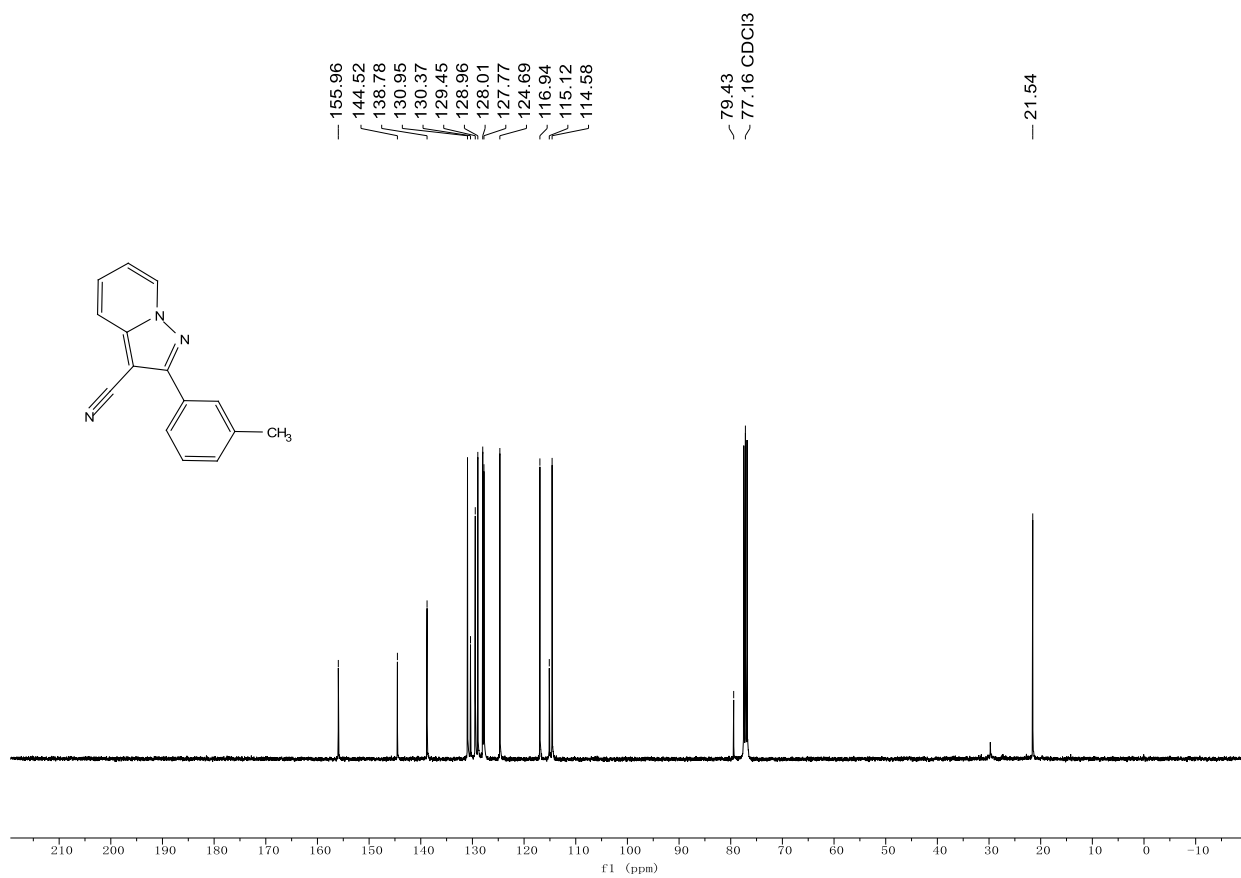

$^1\text{H}$  NMR (400 MHz,  $\text{CDCl}_3$ ) and  $^{13}\text{C}$  NMR (100 MHz,  $\text{CDCl}_3$ ) spectrum of compound **4j**

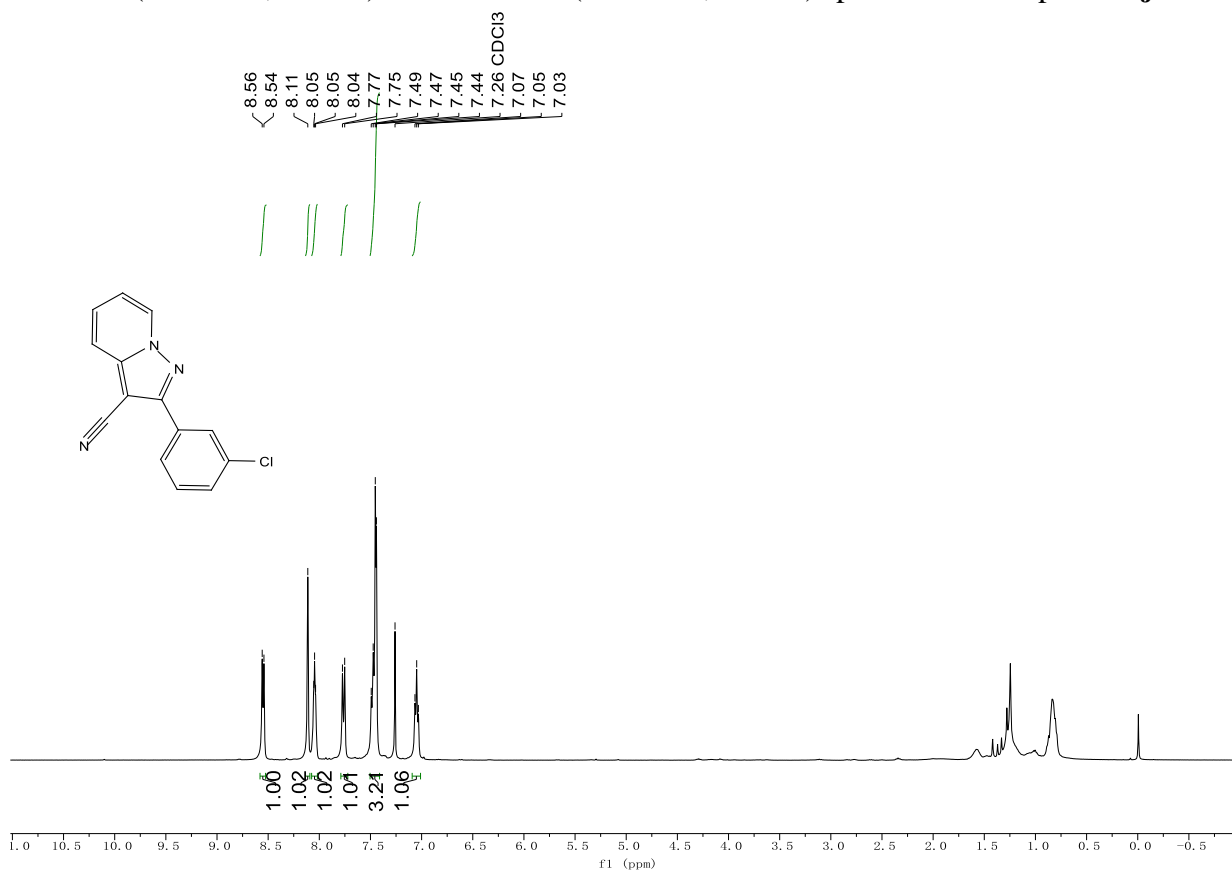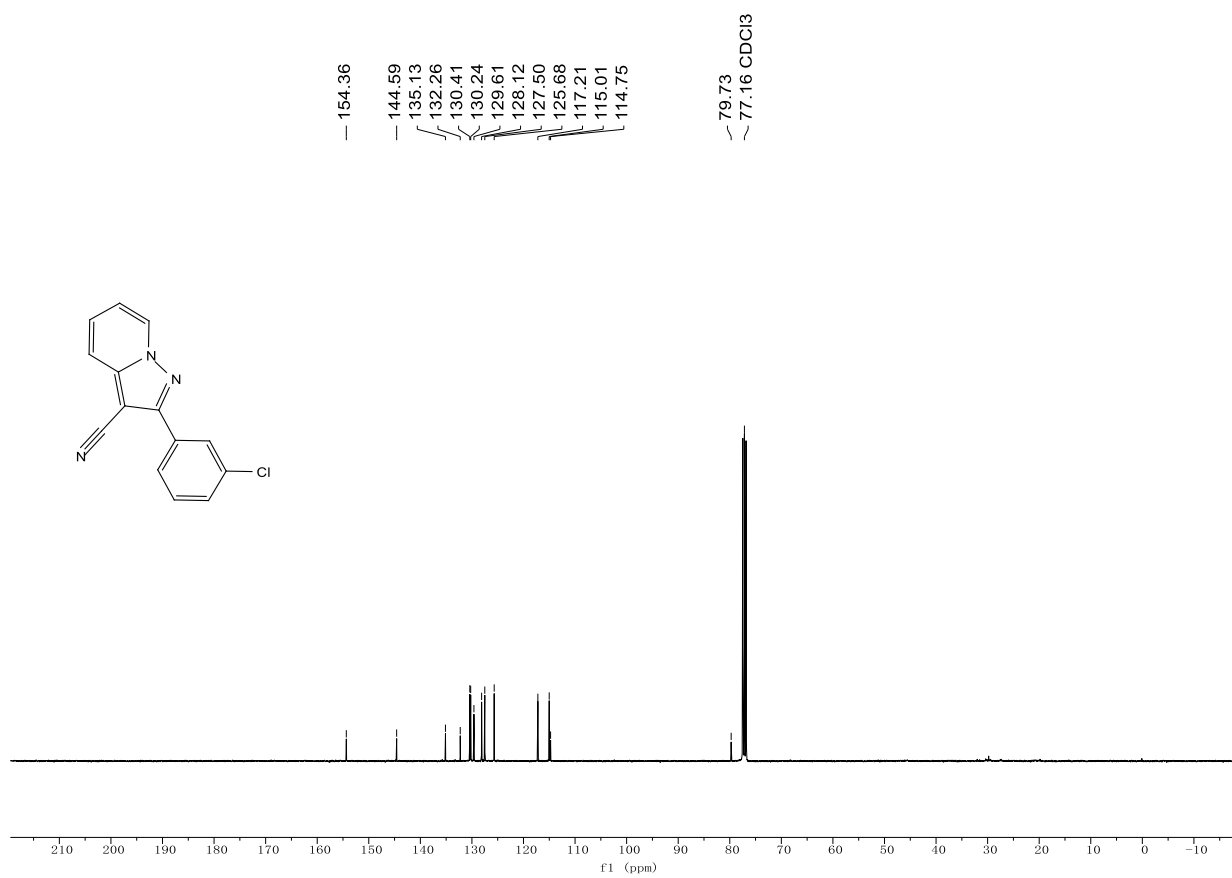

$^1\text{H}$  NMR (400 MHz,  $\text{CDCl}_3$ ) and  $^{13}\text{C}$  NMR (100 MHz,  $\text{CDCl}_3$ ) spectrum of compound **4k**

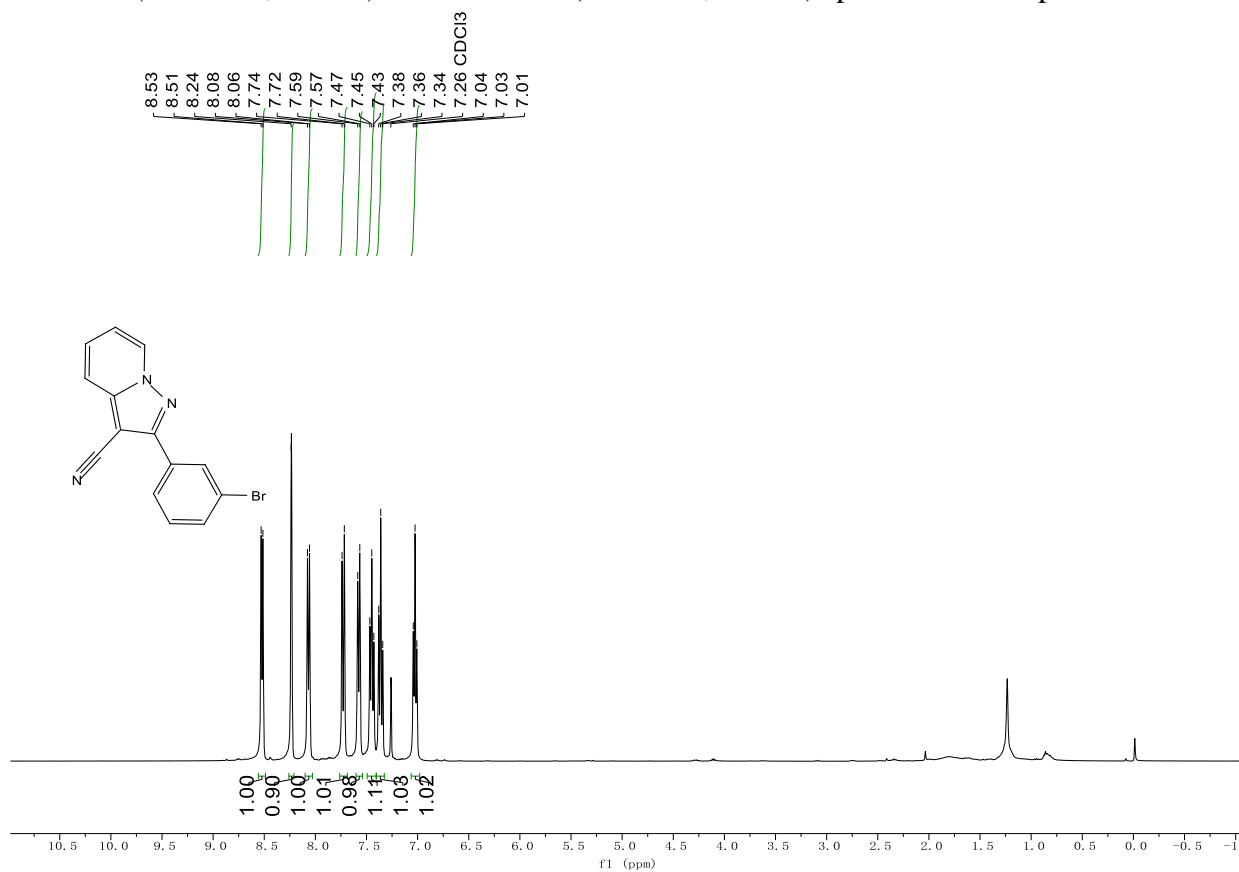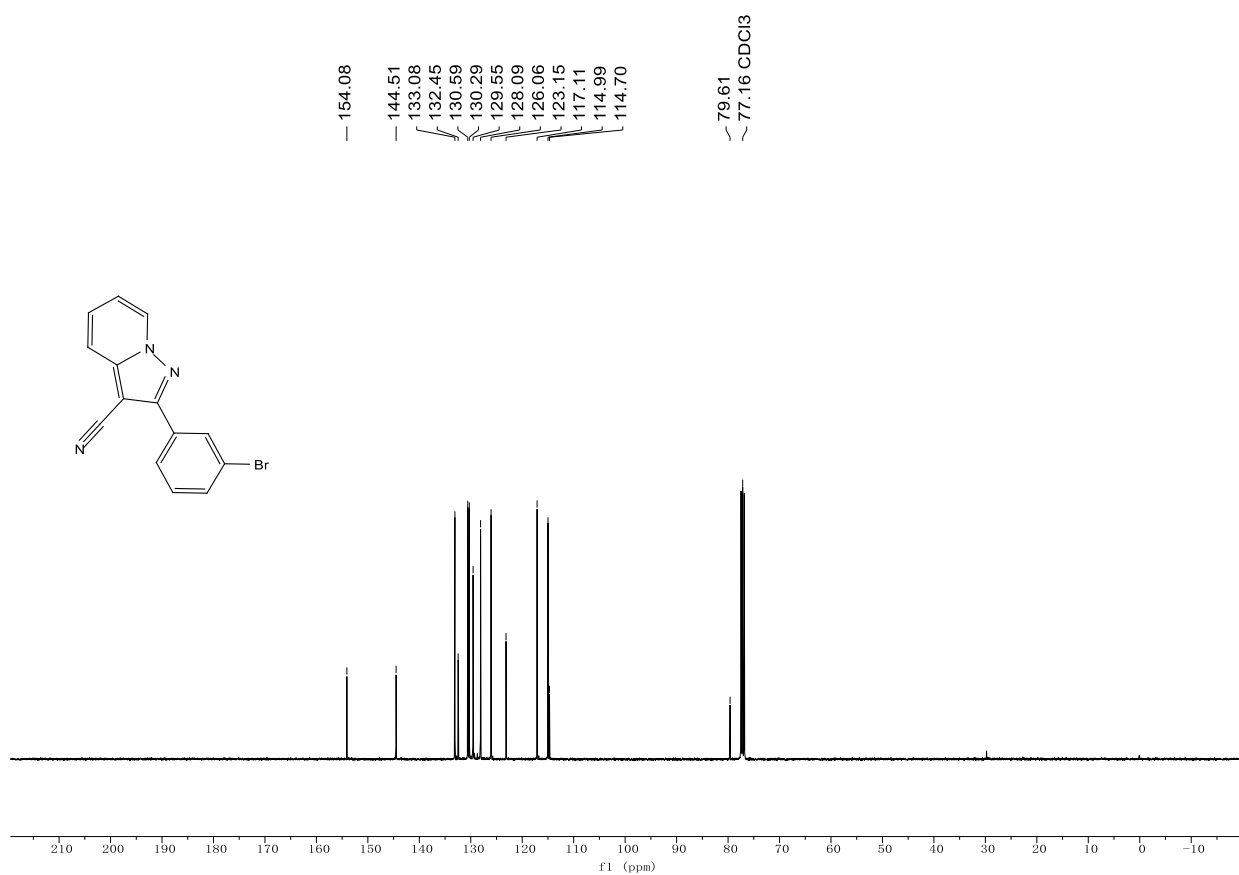



$^1\text{H}$  NMR (400 MHz,  $\text{CDCl}_3$ ) and  $^{13}\text{C}$  NMR (100 MHz,  $\text{CDCl}_3$ ) spectrum of compound **41**

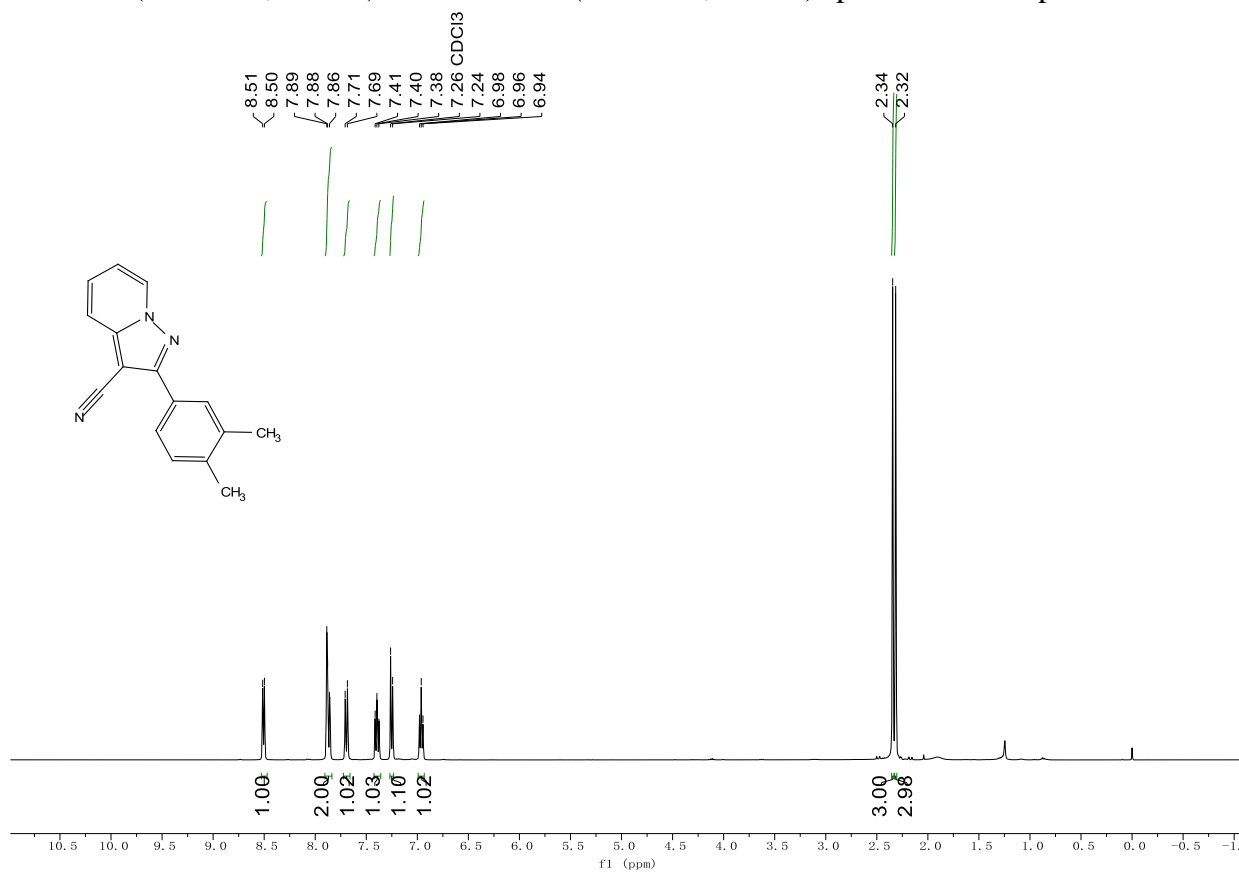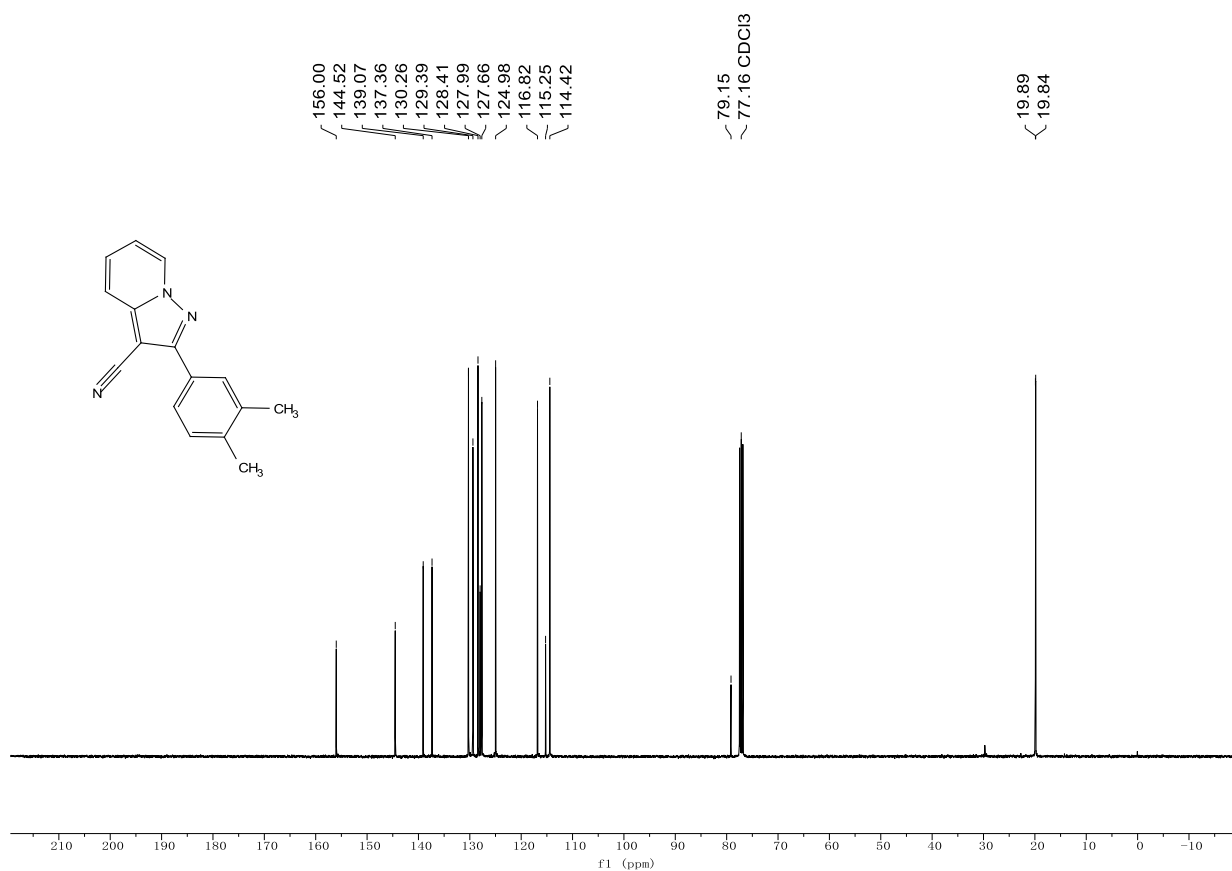

$^1\text{H}$  NMR (400 MHz,  $\text{CDCl}_3$ ) and  $^{13}\text{C}$  NMR (100 MHz,  $\text{CDCl}_3$ ) spectrum of compound **4m**

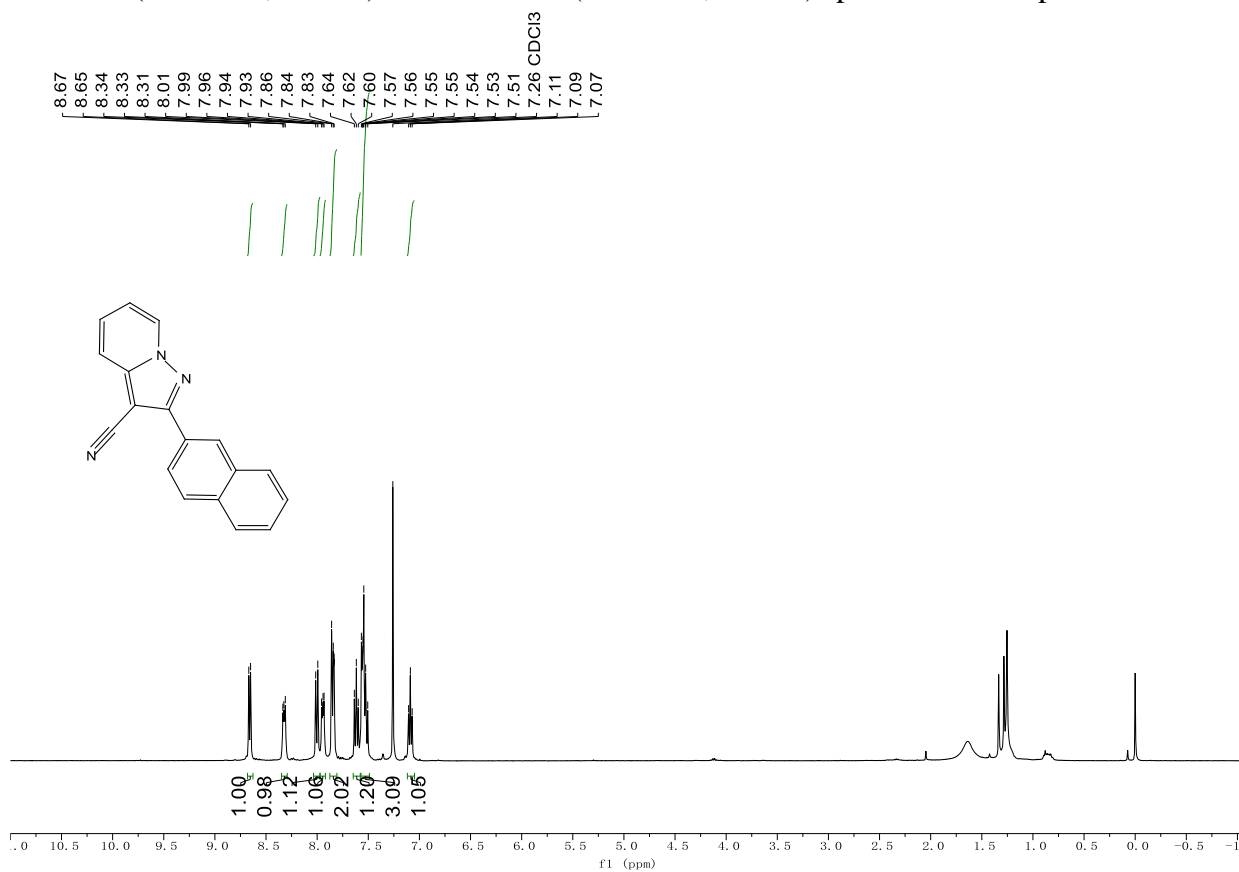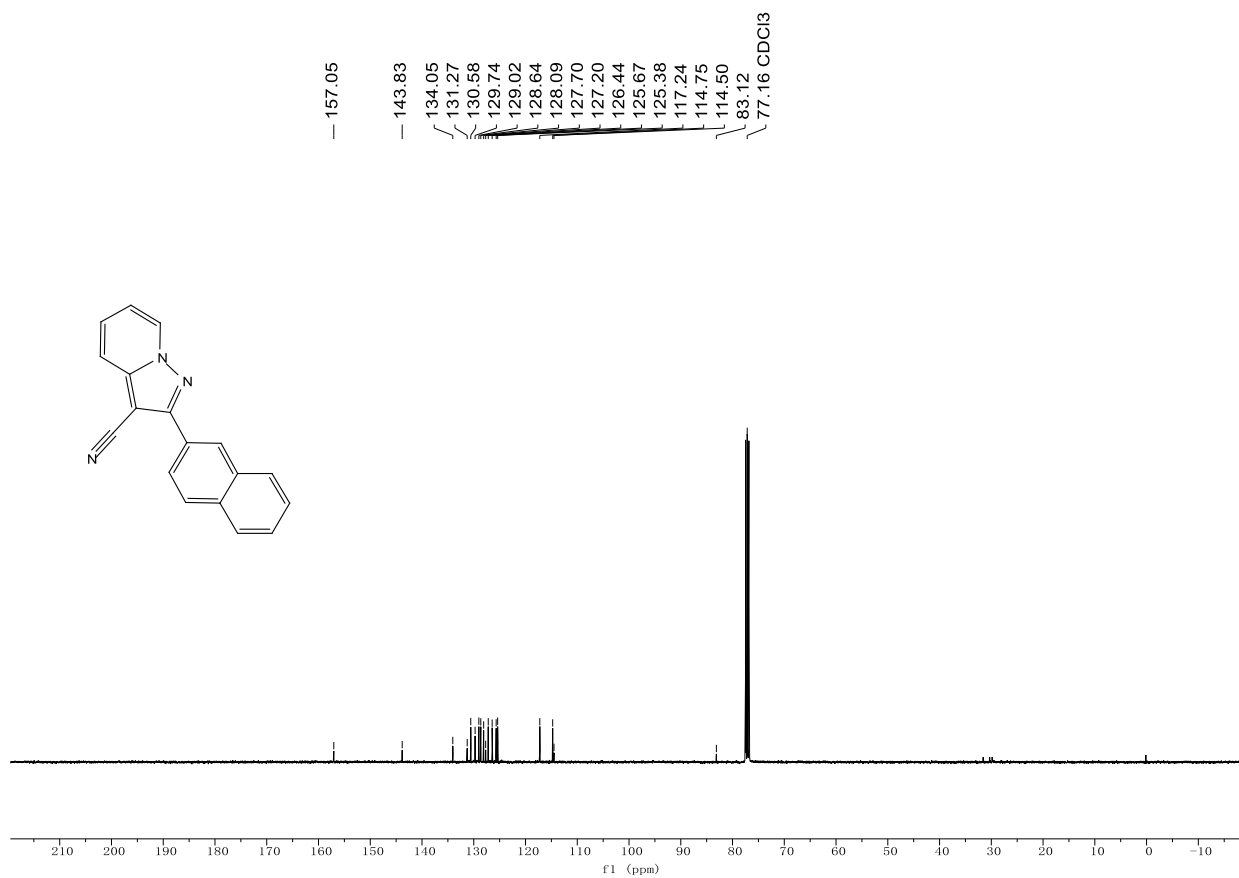

$^1\text{H}$  NMR (400 MHz,  $\text{CDCl}_3$ ) and  $^{13}\text{C}$  NMR (100 MHz,  $\text{CDCl}_3$ ) spectrum of compound **4n**

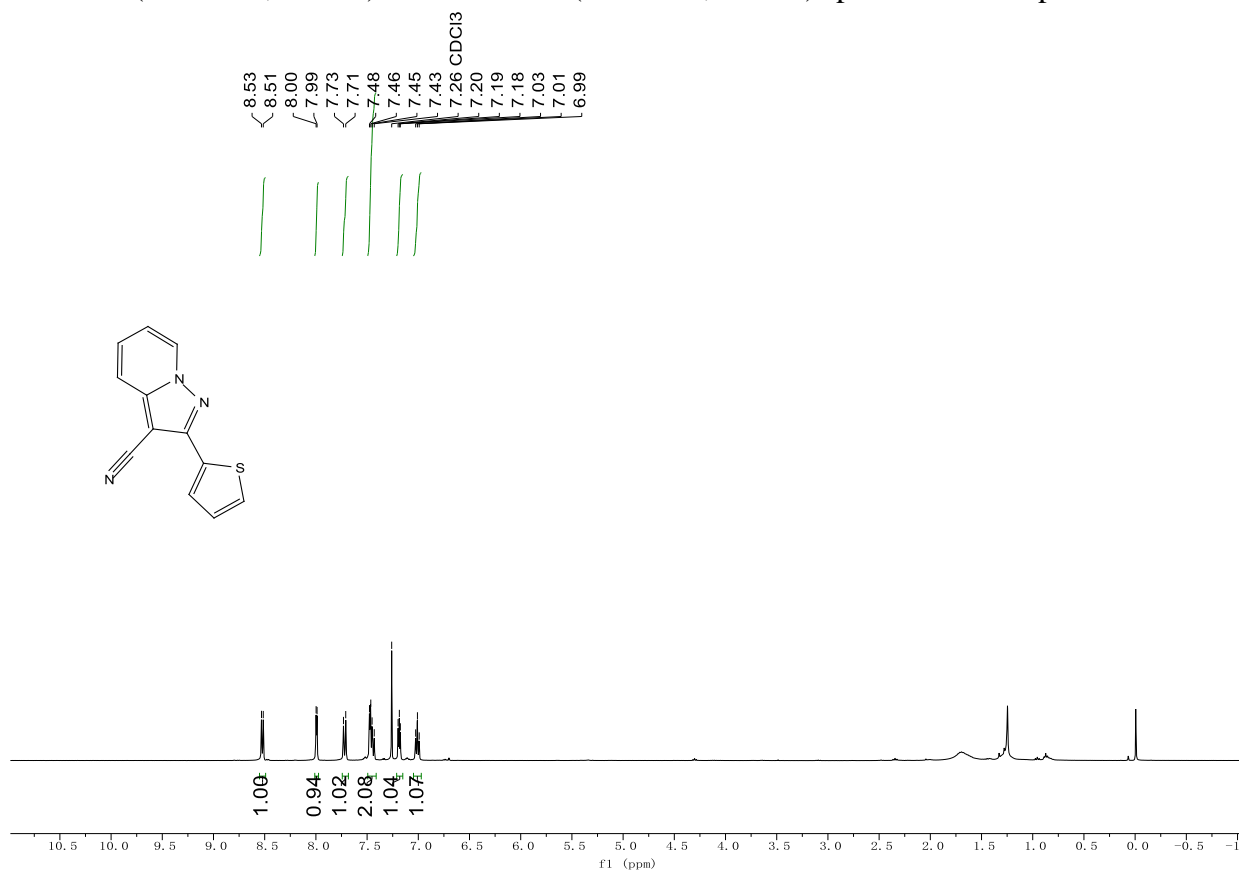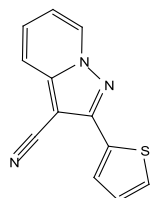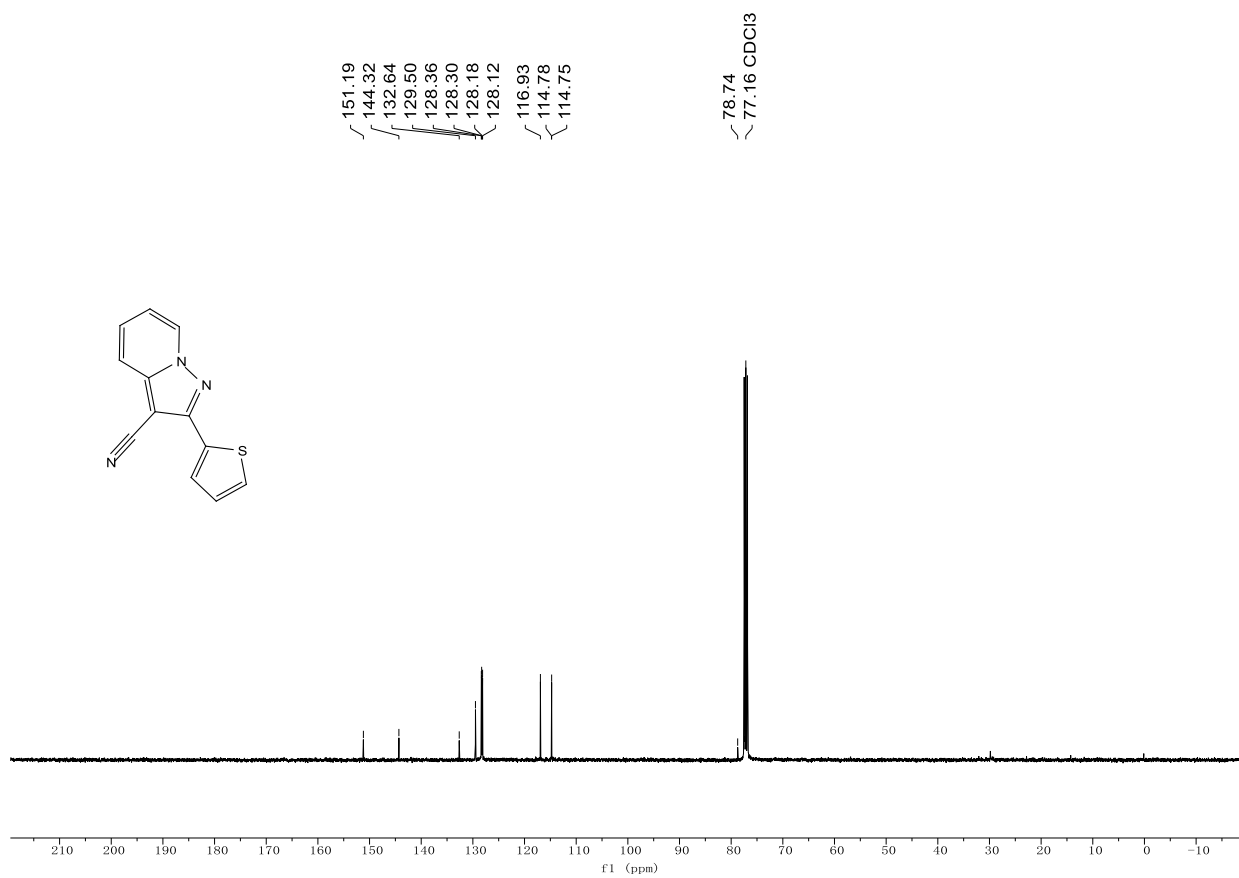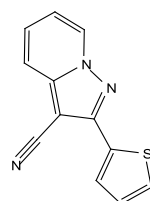

$^1\text{H}$  NMR (400 MHz,  $\text{CDCl}_3$ ) and  $^{13}\text{C}$  NMR (100 MHz,  $\text{CDCl}_3$ ) spectrum of compound **6a**

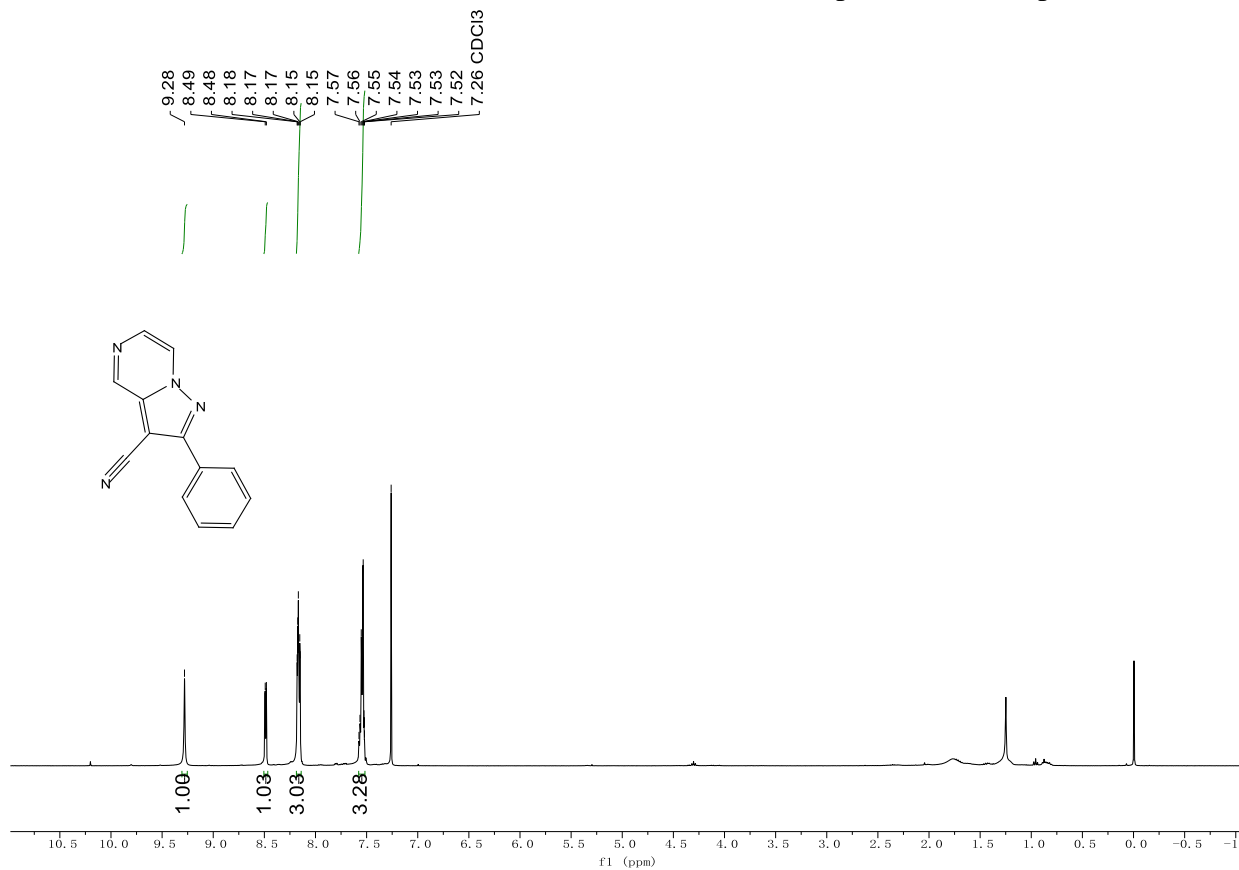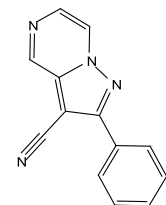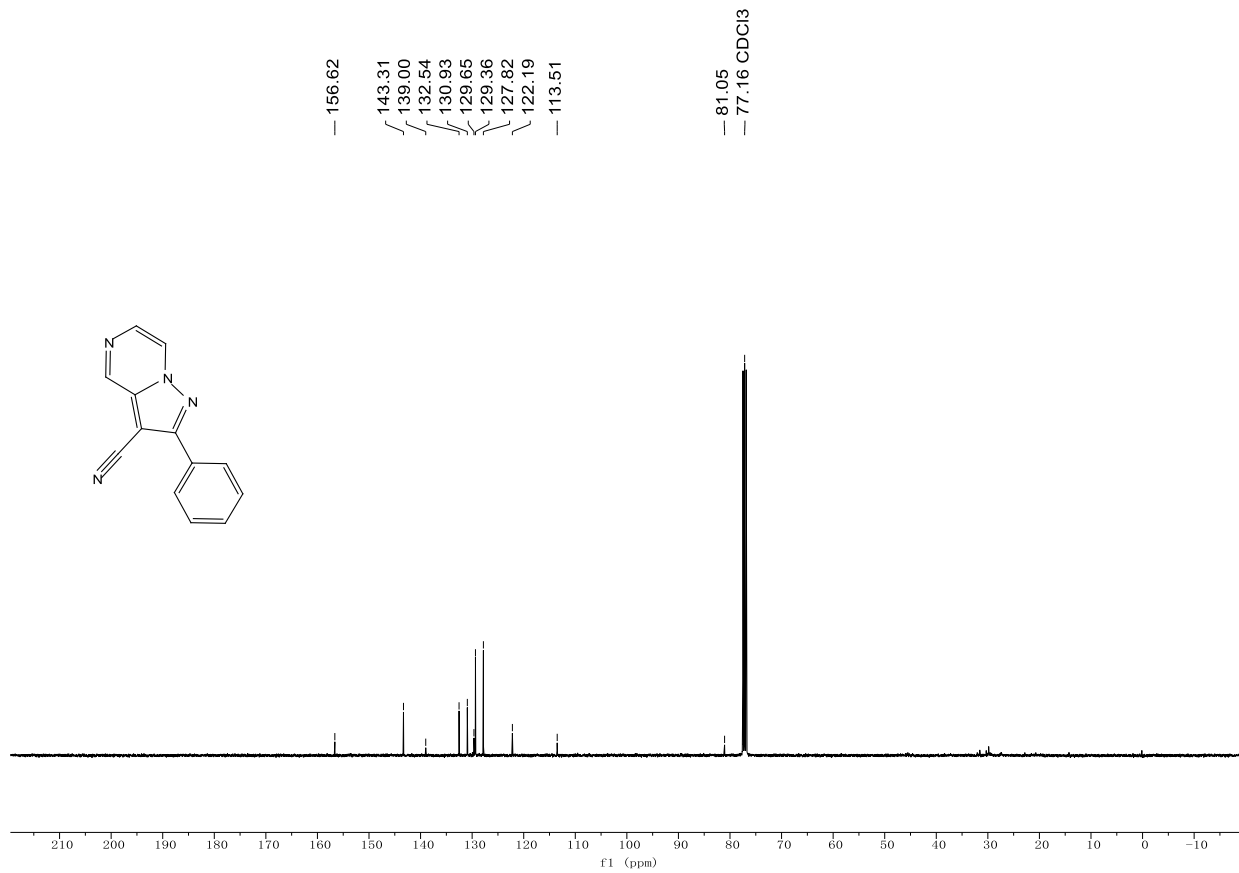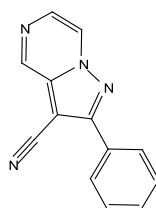

$^1\text{H}$  NMR (400 MHz,  $\text{CDCl}_3$ ) and  $^{13}\text{C}$  NMR (100 MHz,  $\text{CDCl}_3$ ) spectrum of compound **6b**

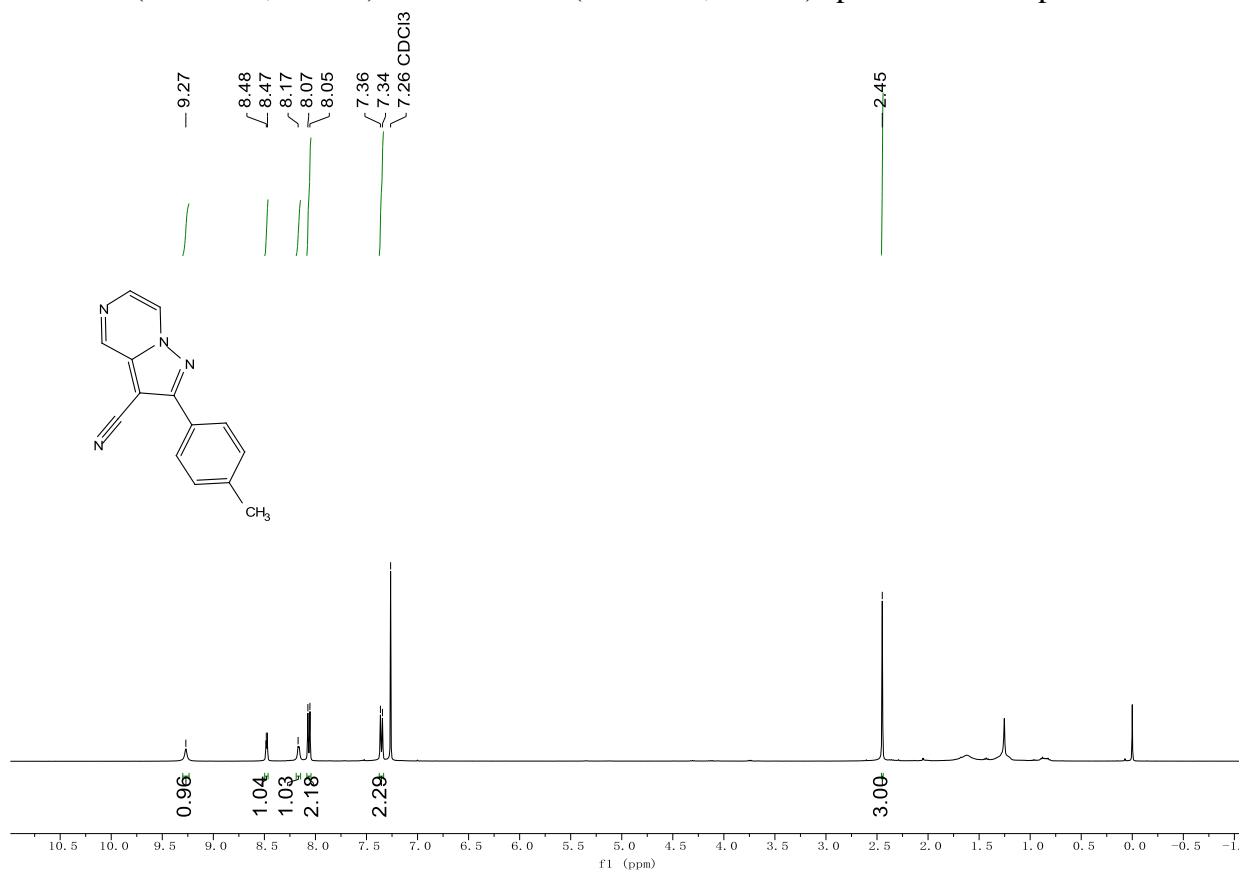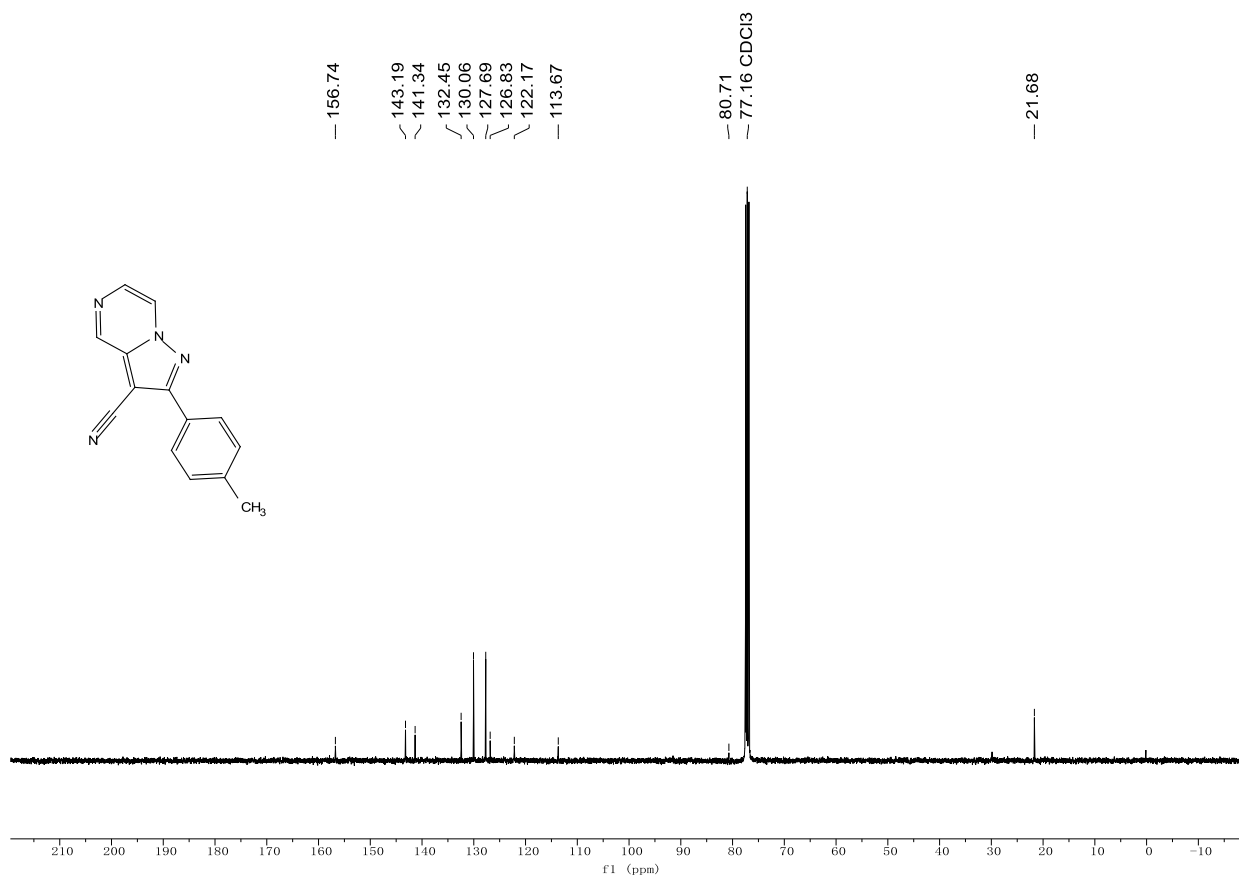

$^1\text{H}$  NMR (400 MHz,  $\text{CDCl}_3$ ) and  $^{13}\text{C}$  NMR (100 MHz,  $\text{CDCl}_3$ ) spectrum of compound **6c**

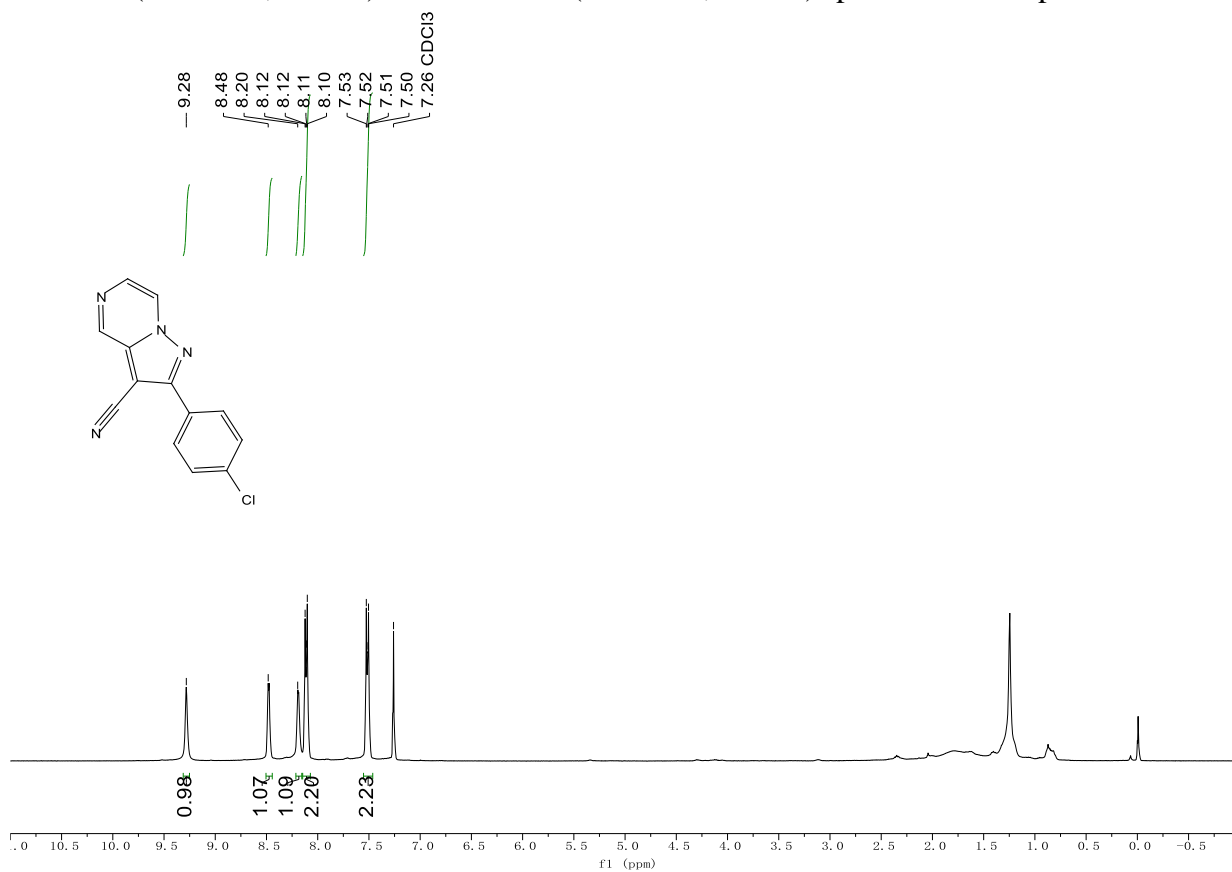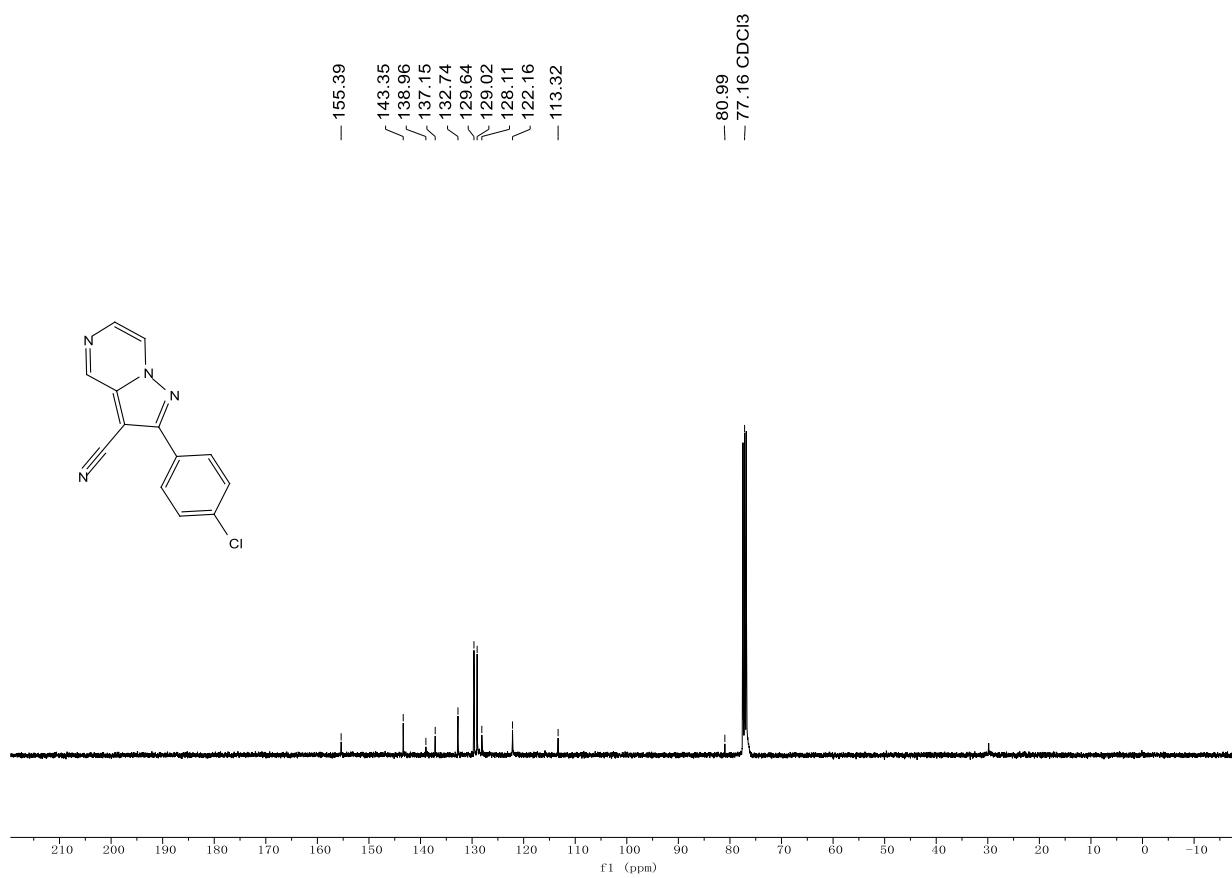

$^1\text{H}$  NMR (400 MHz,  $\text{CDCl}_3$ ) and  $^{13}\text{C}$  NMR (100 MHz,  $\text{CDCl}_3$ ) spectrum of compound **6d**

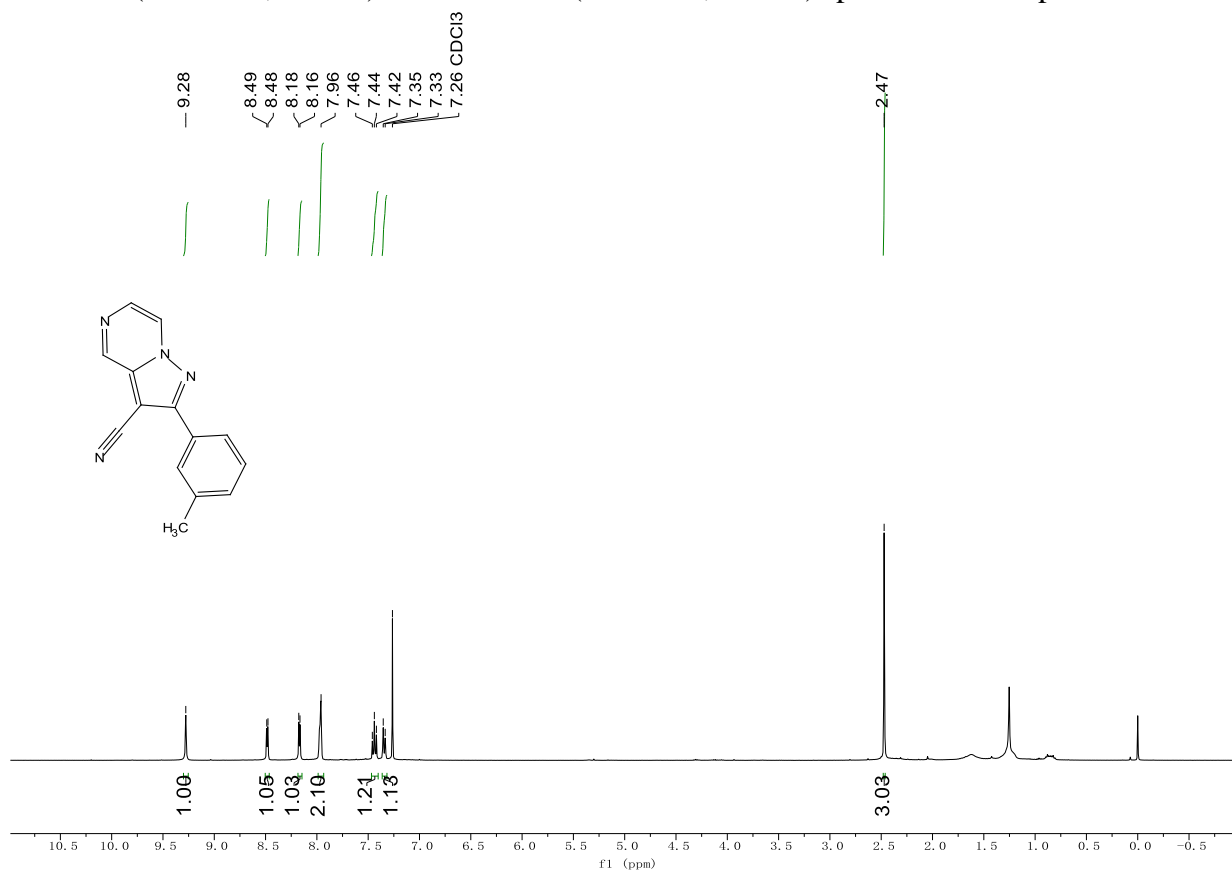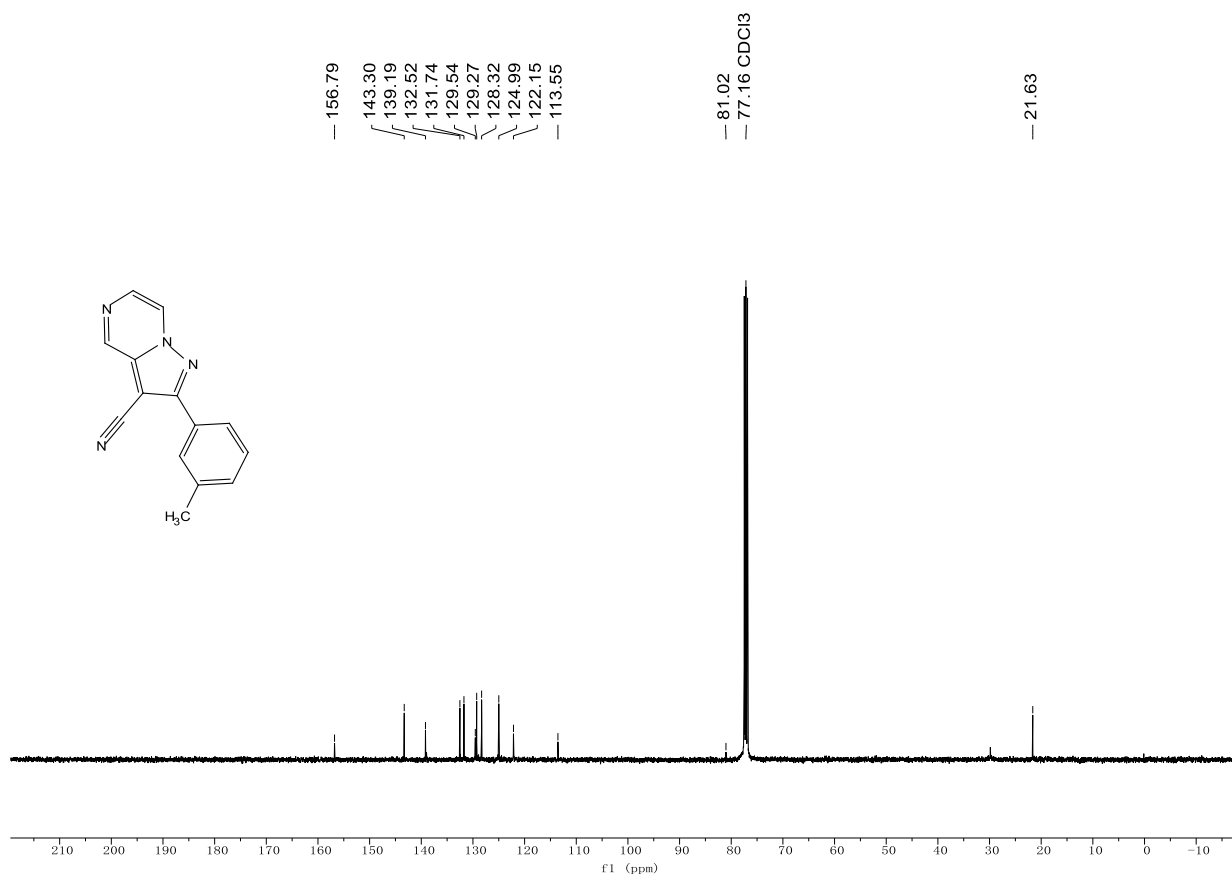

$^1\text{H}$  NMR (400 MHz,  $\text{CDCl}_3$ ) and  $^{13}\text{C}$  NMR (100 MHz,  $\text{CDCl}_3$ ) spectrum of compound **6e**

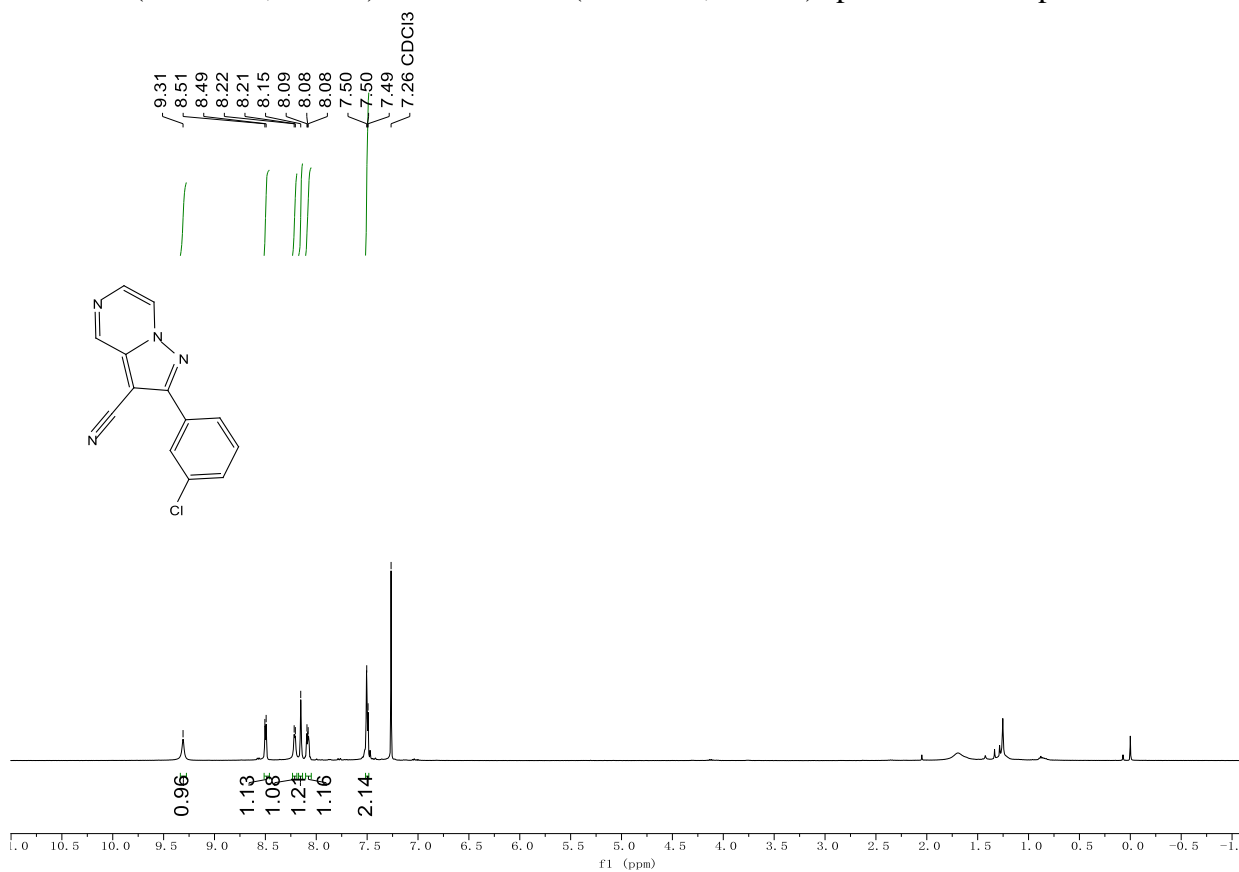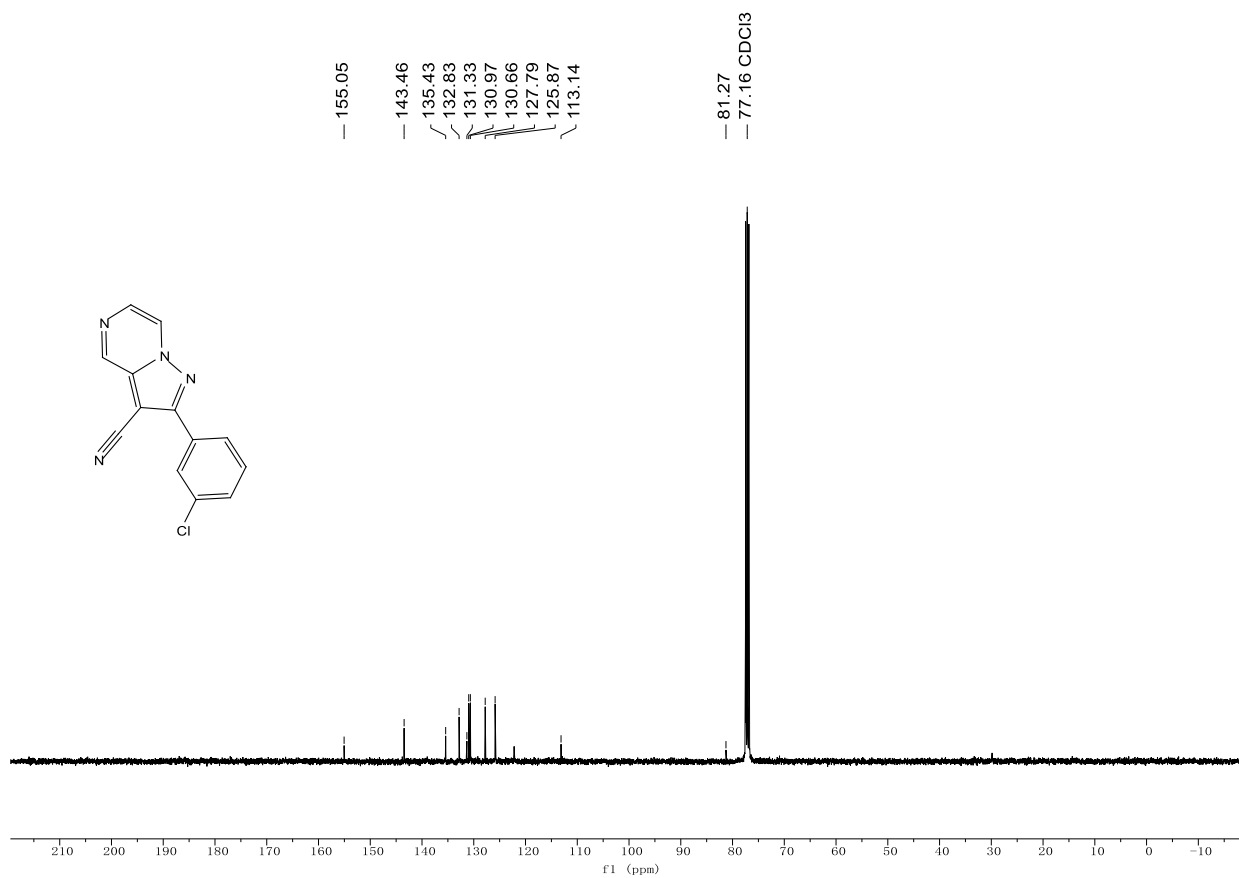



$^1\text{H}$  NMR (400 MHz,  $\text{CDCl}_3$ ) and  $^{13}\text{C}$  NMR (100 MHz,  $\text{CDCl}_3$ ) spectrum of compound **6f**

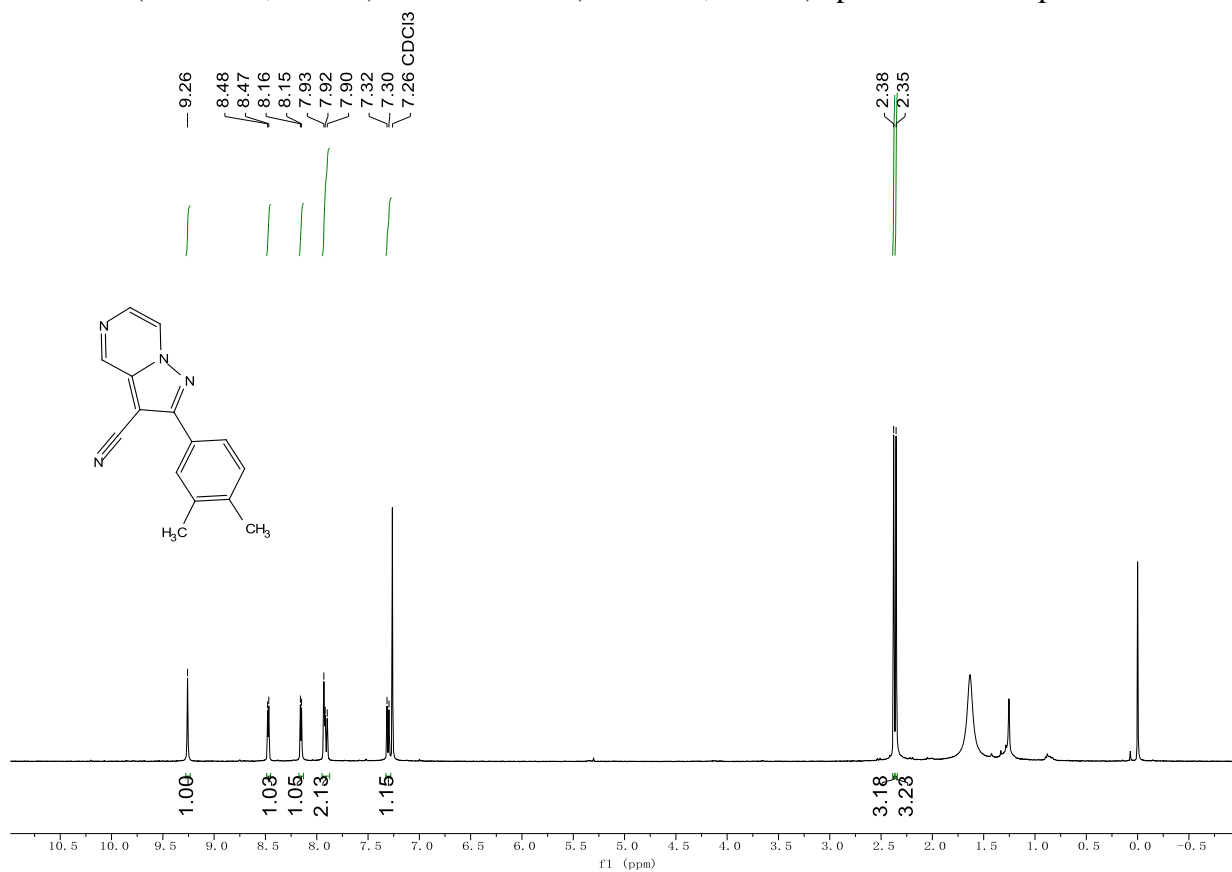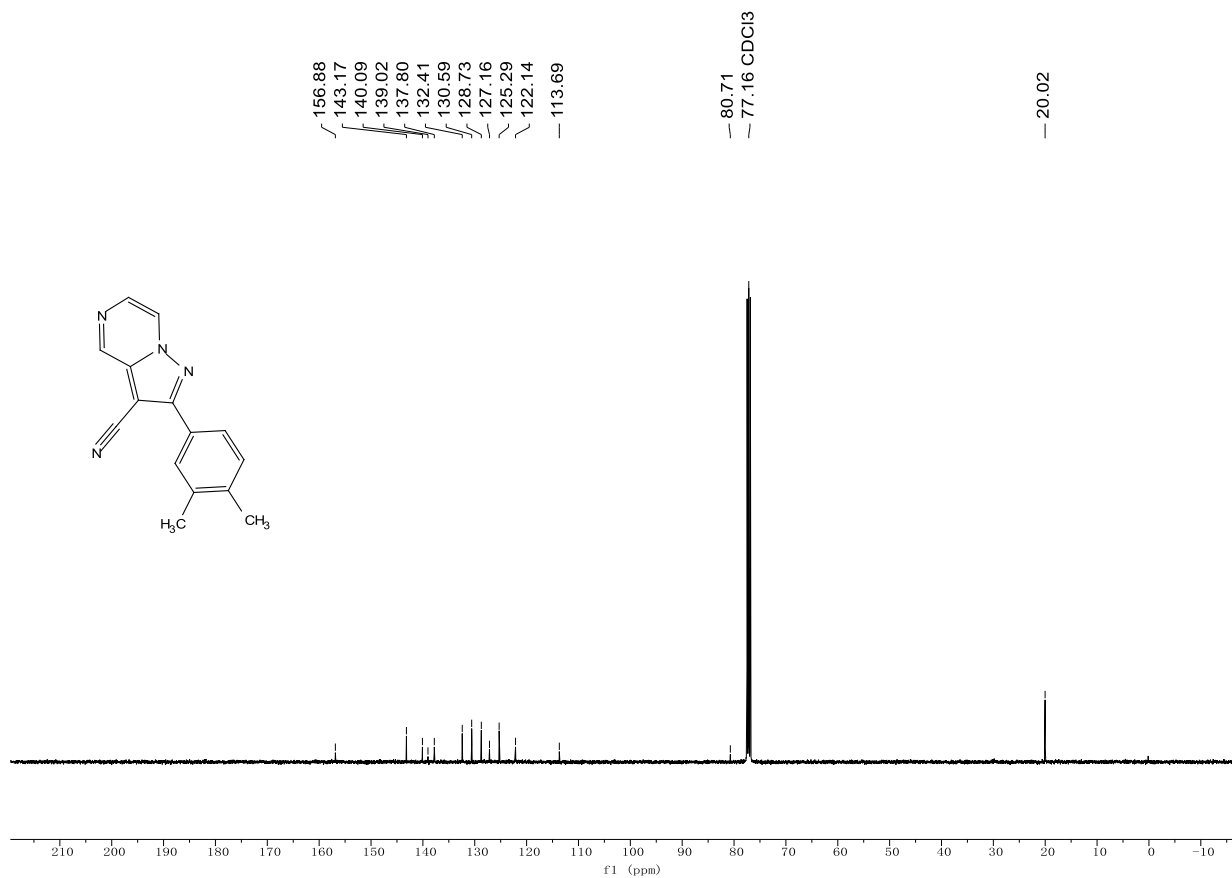

$^1\text{H}$  NMR (400 MHz,  $\text{CDCl}_3$ ) and  $^{13}\text{C}$  NMR (100 MHz,  $\text{CDCl}_3$ ) spectrum of compound 7'

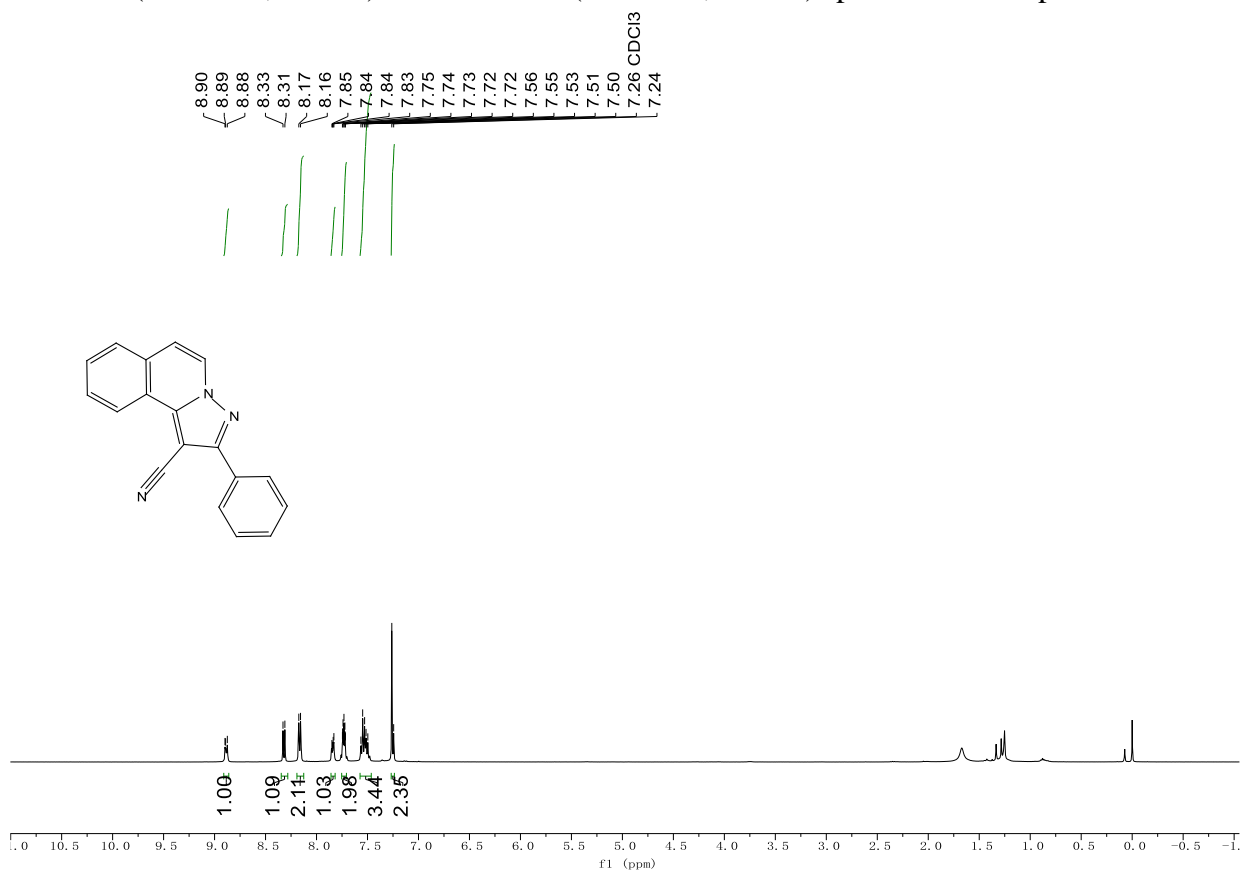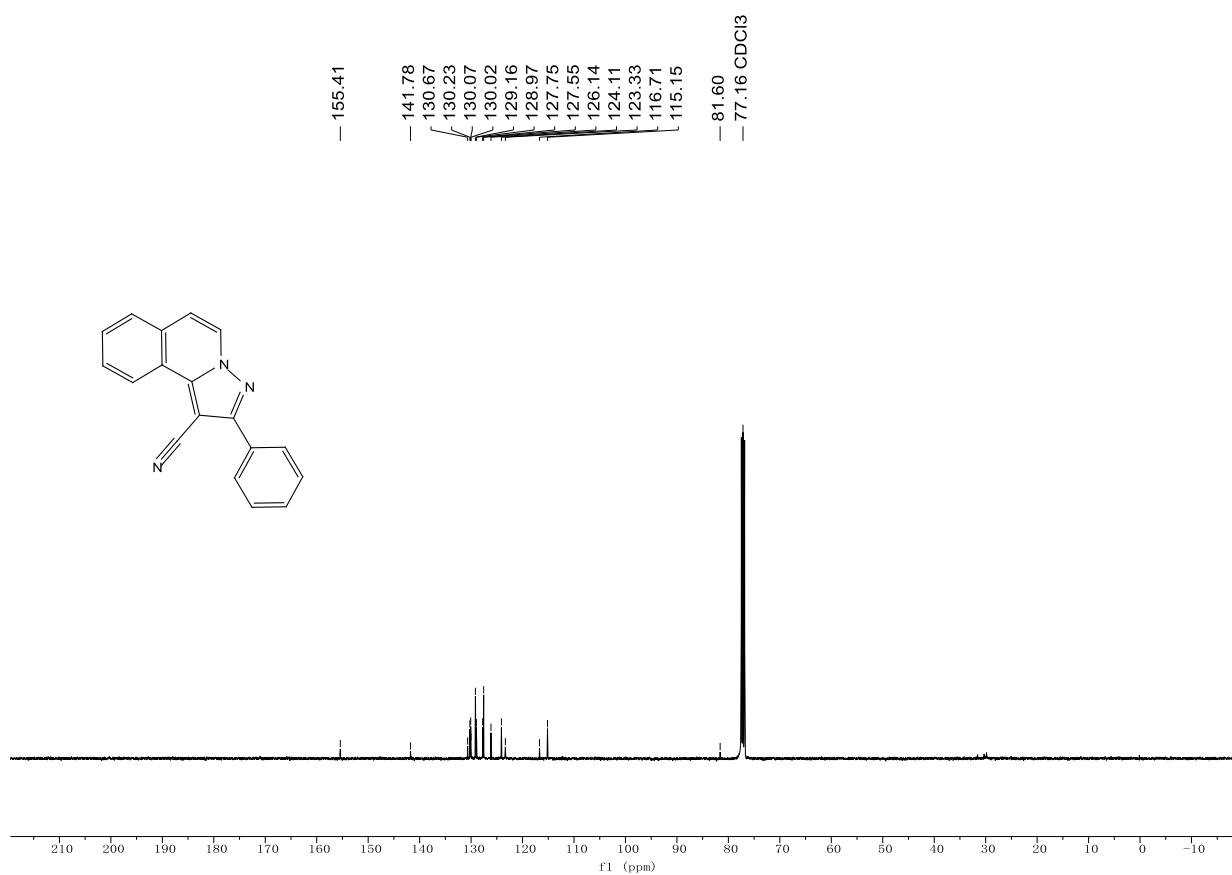

$^1\text{H}$  NMR (400 MHz,  $\text{CDCl}_3$ ) and  $^{13}\text{C}$  NMR (100 MHz,  $\text{CDCl}_3$ ) spectrum of compound **8**

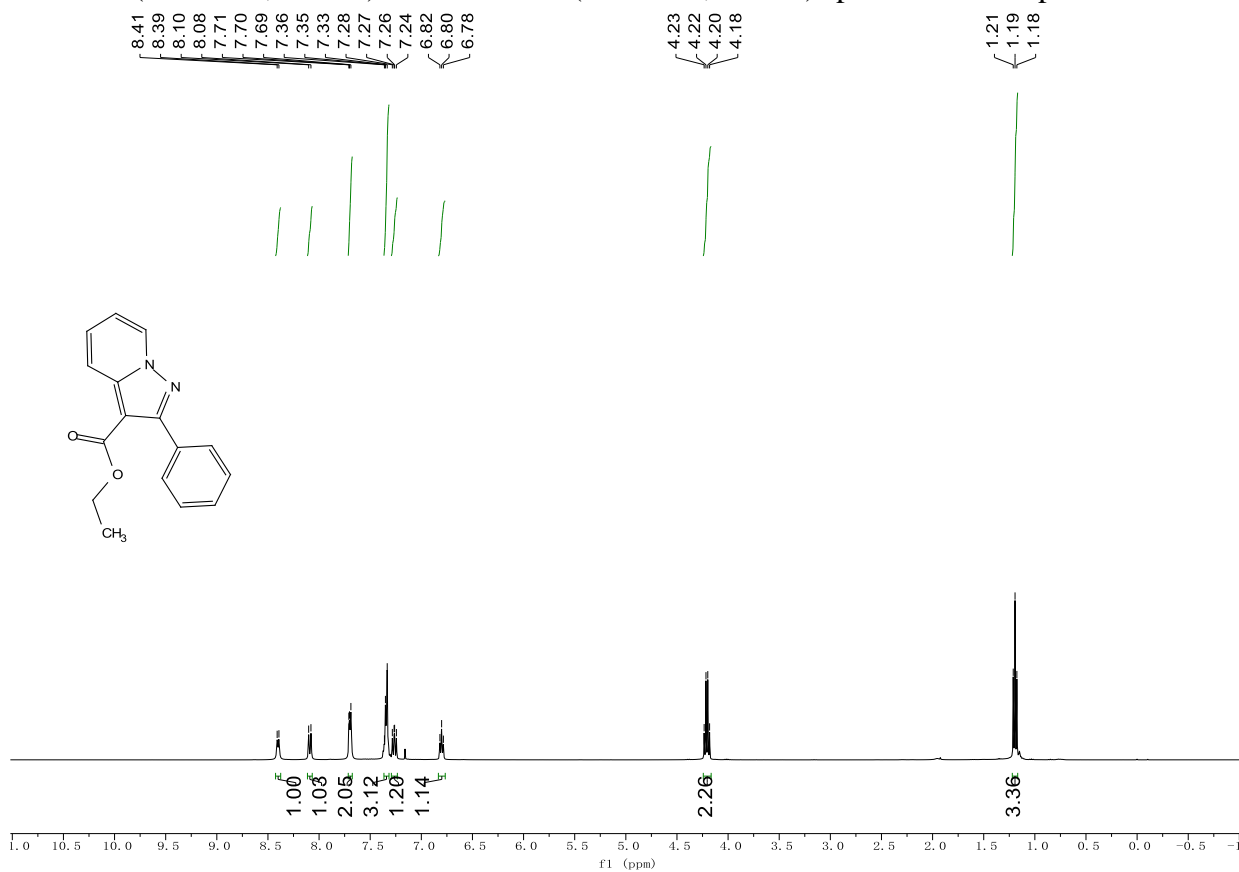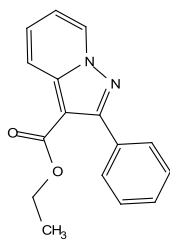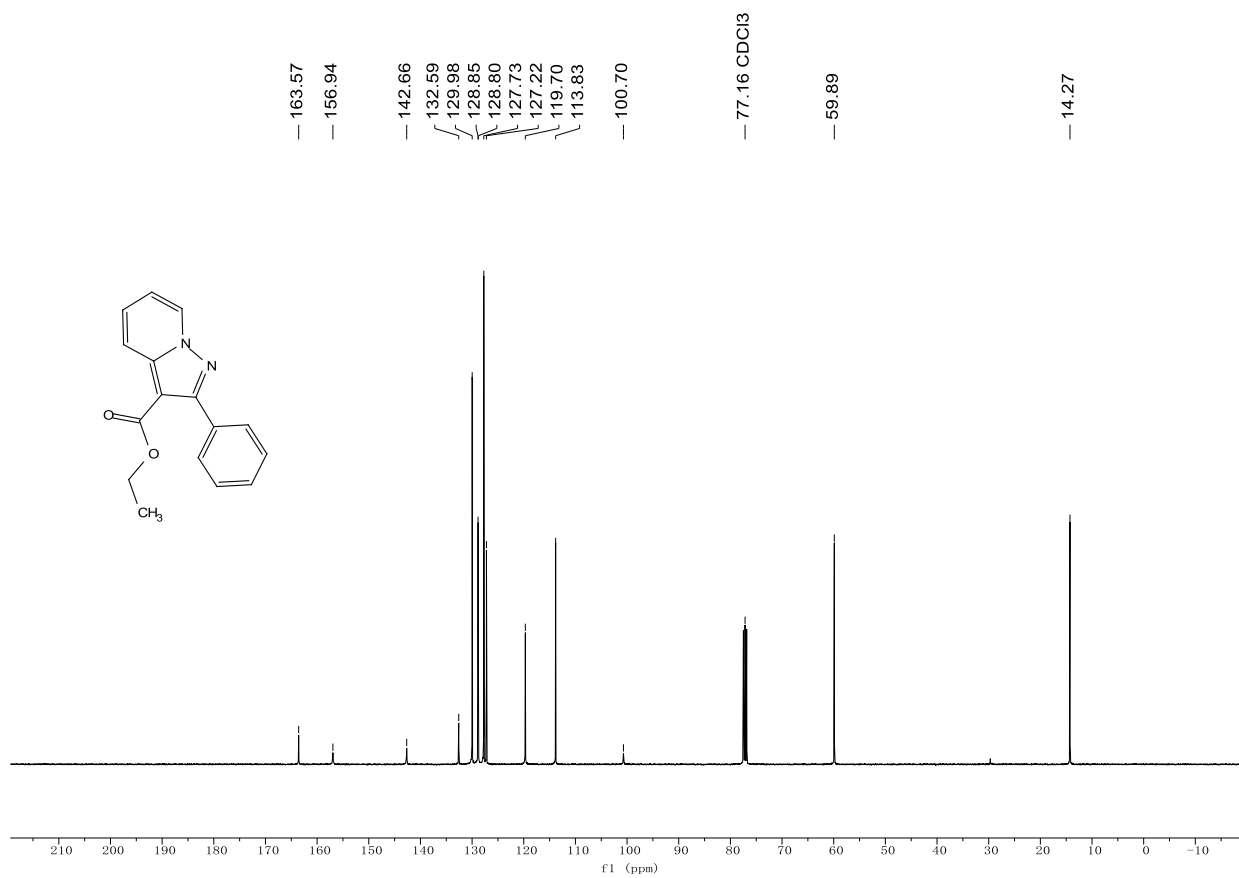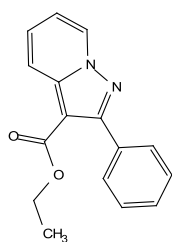

<sup>1</sup>H NMR (400 MHz, DMSO-d<sub>6</sub>) and <sup>13</sup>C NMR (100 MHz, DMSO-d<sub>6</sub>) spectrum of compound 9

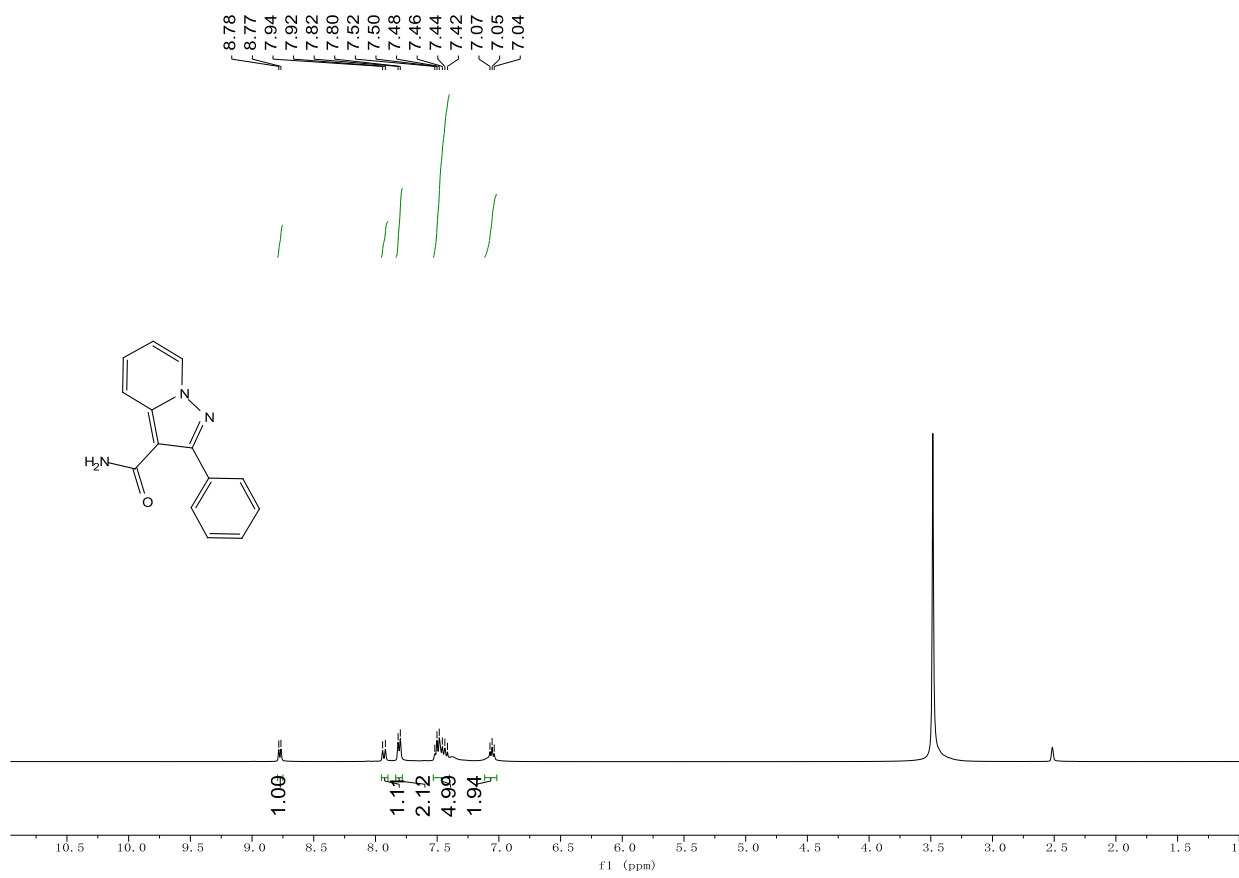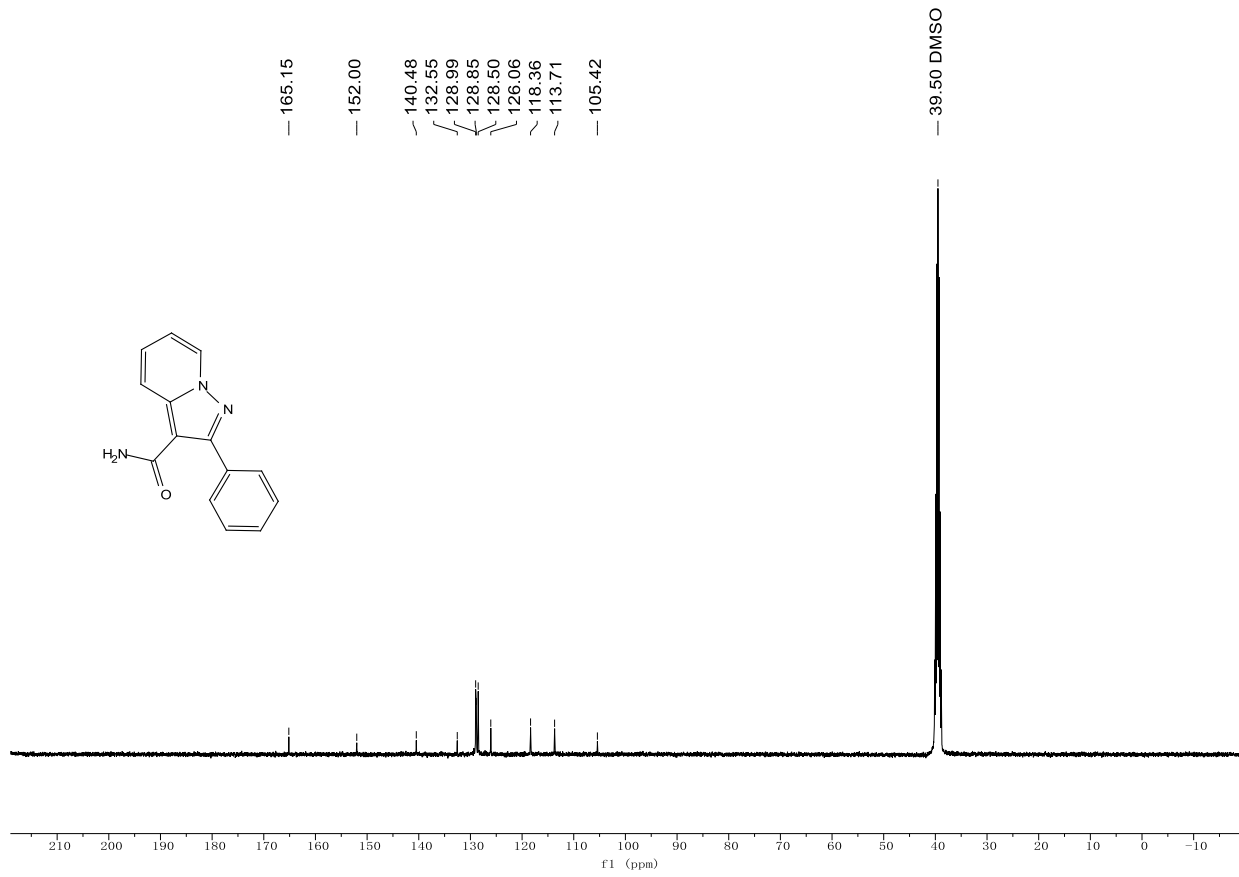

## 4. X-ray crystallographic data

Figure S1 X-ray single crystal structure of **3a**

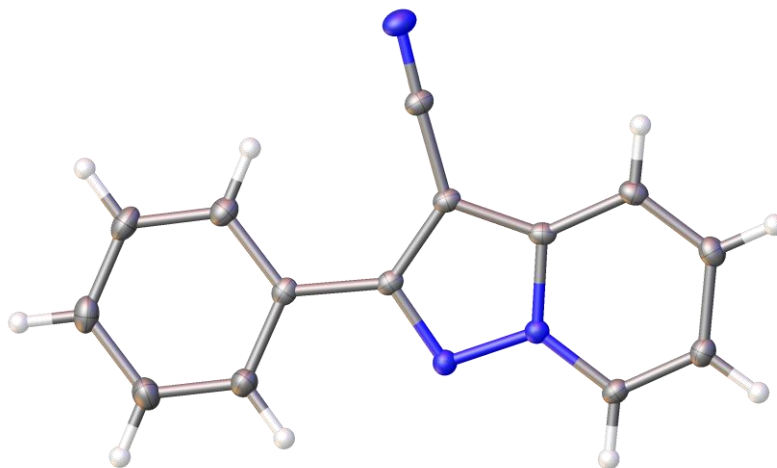

Single crystals of **3a** were grown by slow evaporation of its EA/PE solution. Supplementary crystallographic data have been deposited at the Cambridge Crystallographic Data Center (CCDC 2242824).

**Table S1** Crystal data and structure refinement for **3a**.

|                                             |                                                               |
|---------------------------------------------|---------------------------------------------------------------|
| Identification code                         | gy1115                                                        |
| Empirical formula                           | C <sub>14</sub> H <sub>9</sub> N <sub>3</sub>                 |
| Formula weight                              | 219.24                                                        |
| Temperature/K                               | 200.00(10)                                                    |
| Crystal system                              | monoclinic                                                    |
| Space group                                 | P2 <sub>1</sub> /c                                            |
| a/Å                                         | 5.5109(5)                                                     |
| b/Å                                         | 9.7172(8)                                                     |
| c/Å                                         | 19.8992(17)                                                   |
| α/°                                         | 90                                                            |
| β/°                                         | 89.678(8)                                                     |
| γ/°                                         | 90                                                            |
| Volume/Å <sup>3</sup>                       | 1065.60(16)                                                   |
| Z                                           | 4                                                             |
| ρ <sub>calc</sub> /cm <sup>3</sup>          | 1.367                                                         |
| μ/mm <sup>-1</sup>                          | 0.085                                                         |
| F(000)                                      | 456.0                                                         |
| Crystal size/mm <sup>3</sup>                | 0.15 × 0.12 × 0.11                                            |
| Radiation                                   | Mo Kα (λ = 0.71073)                                           |
| 2θ range for data collection/°              | 4.094 to 49.998                                               |
| Index ranges                                | -6 ≤ h ≤ 6, -11 ≤ k ≤ 8, -23 ≤ l ≤ 23                         |
| Reflections collected                       | 5024                                                          |
| Independent reflections                     | 1890 [R <sub>int</sub> = 0.1229, R <sub>sigma</sub> = 0.1080] |
| Data/restraints/parameters                  | 1890/0/155                                                    |
| Goodness-of-fit on F <sup>2</sup>           | 1.053                                                         |
| Final R indexes [I ≥ 2σ (I)]                | R <sub>1</sub> = 0.0666, wR <sub>2</sub> = 0.1593             |
| Final R indexes [all data]                  | R <sub>1</sub> = 0.0814, wR <sub>2</sub> = 0.1805             |
| Largest diff. peak/hole / e Å <sup>-3</sup> | 0.35/-0.33                                                    |

**Table S2** Bond Lengths for **3a**

| Atom | Atom | Length/Å |
|------|------|----------|
| N1   | C14  | 1.148(3) |
| N2   | N3   | 1.364(2) |
| N2   | C9   | 1.379(3) |
| N2   | C13  | 1.357(2) |
| N3   | C7   | 1.336(2) |
| C1   | C2   | 1.387(3) |
| C1   | C6   | 1.392(3) |
| C1   | C7   | 1.472(3) |
| C2   | C3   | 1.383(3) |
| C3   | C4   | 1.386(4) |
| C4   | C5   | 1.372(3) |
| C5   | C6   | 1.380(3) |
| C7   | C8   | 1.417(3) |
| C8   | C9   | 1.395(3) |
| C8   | C14  | 1.417(3) |
| C9   | C10  | 1.406(3) |
| C10  | C11  | 1.348(3) |
| C11  | C12  | 1.414(3) |
| C12  | C13  | 1.349(3) |

**Table S3** Bond Angles for **3a**

| Atom | Atom | Atom | Angle/°    |
|------|------|------|------------|
| N3   | N2   | C9   | 112.63(15) |
| C13  | N2   | N3   | 124.07(16) |
| C13  | N2   | C9   | 123.29(17) |
| C7   | N3   | N2   | 105.18(16) |
| C2   | C1   | C6   | 118.0(2)   |
| C2   | C1   | C7   | 122.8(2)   |
| C6   | C1   | C7   | 119.19(19) |
| C3   | C2   | C1   | 120.7(2)   |
| C2   | C3   | C4   | 120.8(2)   |
| C5   | C4   | C3   | 118.7(2)   |
| C4   | C5   | C6   | 120.9(3)   |
| C5   | C6   | C1   | 120.9(2)   |
| N3   | C7   | C1   | 119.00(19) |
| N3   | C7   | C8   | 111.10(17) |
| C8   | C7   | C1   | 129.90(18) |
| C7   | C8   | C14  | 130.35(19) |
| C9   | C8   | C7   | 105.87(17) |
| C9   | C8   | C14  | 123.8(2)   |
| N2   | C9   | C8   | 105.22(18) |
| N2   | C9   | C10  | 118.00(18) |
| C8   | C9   | C10  | 136.79(19) |

|     |     |     |            |
|-----|-----|-----|------------|
| C11 | C10 | C9  | 118.96(19) |
| C10 | C11 | C12 | 121.1(2)   |
| C13 | C12 | C11 | 120.03(19) |
| C12 | C13 | N2  | 118.59(19) |
| N1  | C14 | C8  | 178.4(2)   |

**Table S4** checkCIF/PLATON report

|                   |                         |                               |                           |
|-------------------|-------------------------|-------------------------------|---------------------------|
| Bond precision    | C-C = 0.0031 Å          | Wavelength = 0.71073          |                           |
| Cell              | a=5.5109(5)<br>alpha=90 | b=9.7172(8)<br>beta=89.678(8) | c=19.8992(17)<br>gamma=90 |
| Temperature       | 200 K                   | 1.379(3)                      |                           |
|                   | Calculated              | Reported                      |                           |
| Volume            | 1065.60(16)             | 1065.60(16)                   |                           |
| Space group       | P 21/c                  | P 1 21/c 1                    |                           |
| Hall group        | -P 2ybc                 | -P 2ybc                       |                           |
| Moiety formula    | C14 H9 N3               | C14 H9 N3                     |                           |
| Sum formula       | C14 H9 N3               | C14 H9 N3                     |                           |
| Mr                | 219.24                  | 219.24                        |                           |
| Dx,g cm-3         | 1.367                   | 1.367                         |                           |
| Z                 | 4                       | 4                             |                           |
| Mu (mm-1)         | 0.085                   | 0.085                         |                           |
| F000              | 456.0                   | 456.0                         |                           |
| F000'             | 456.15                  |                               |                           |
| h,k,lmax          | 6,11,23                 | 6,11,23                       |                           |
| Nref              | 1889                    | 1890                          |                           |
| Tmin,Tmax         | 0.988,0.991             |                               |                           |
| Correction method | Not given               |                               |                           |
| Data completeness | 1.001                   |                               |                           |
| Theta(max)        | 24.999                  |                               |                           |
| R(reflections)    | 0.0666(1427)            |                               |                           |
| wR2(reflections)  | 0.1805(1890)            |                               |                           |
| S                 | 1.053                   |                               |                           |
| Npar              | 155                     |                               |                           |

The following ALERTS were generated. Each ALERT has the format

**test-name\_ALERT\_alert-type\_alert-level.**

Click on the hyperlinks for more details of the test.

**Alert level C**

RINTA01\_ALERT\_3\_C The value of Rint is greater than 0.12

Rint given 0.123

PLAT157\_ALERT\_4\_C Non-standard Monoclinic Beta Angle less 90 Deg 89.68

**Degree Alert level G**

PLAT020\_ALERT\_3\_G The Value of Rint is Greater Than 0.12 ..... 0.123 Report

PLAT158\_ALERT\_4\_G The Input Unitcell is NOT Standard/Reduced ..... Please Check  
 PLAT909\_ALERT\_3\_G Percentage of I>2sig(I) Data at Theta(Max) Still 49% Note  
 PLAT941\_ALERT\_3\_G Average HKL Measurement Multiplicity .....

2.7 Low PLAT967\_ALERT\_5\_G Note: Two-Theta Cutoff Value in Embedded .res .. 50.0 Degree  
 PLAT978\_ALERT\_2\_G Number C-C Bonds with Positive Residual Density. 2 Info

0 **ALERT level A** = Most likely a serious problem - resolve or explain  
 0 **ALERT level B** = A potentially serious problem, consider carefully  
 2 **ALERT level C** = Check. Ensure it is not caused by an omission or oversight  
 6 **ALERT level G** = General information/check it is not something unexpected

0 **ALERT type 1** CIF construction/syntax error, inconsistent or missing data  
 1 **ALERT type 2** Indicator that the structure model may be wrong or deficient  
 4 **ALERT type 3** Indicator that the structure quality may be low  
 2 **ALERT type 4** Improvement, methodology, query or suggestion  
 1 **ALERT type 5** Informative message, check

## 5. References

1. Dai, W.; Li, C.; Liu, Y.; Han, X.; Li, X.; Chen, K.; Liu, H. *Org. Chem. Front.* **2020**, *7*, 2612-2617.
2. Li, Y.; Cui, M.; Sha, F.; Li, Q.; Wu, X. *Org. Biomol. Chem.* **2019**, *17*, 8963-8968.
3. Fang, L.; Chen, L.; Yu, J.; Wang, L. *Eur. J. Org. Chem.* **2015**, *9*, 1910-1914.
4. Yang, D.; Yu, Y.; Wu, Y.; Feng, H.; Li, X.; Cao, H. *Org. Lett.* **2018**, *20*, 2477-2480.
5. (a) Lu, C.; Ye, M.; Li, M.; Zhang, Z.; He, Y.; Long, L.; Chen, Z. *Chin. Chem. Lett.*, **2021**, *32*, 3967-3971;  
 (b) Ravi, C.; Mohan, D. C.; Reddy, N. N. K.; Adimurthy, S. *RSC Adv.* **2015**, *5*, 42961-42964;  
 (c) Wang, A.; Liu, Y.-Z.; Shen, Z.; Qiao Z.; Ma, X. *Org. Lett.*, **2022**, *24*, 1454-1459.
6. Ravi, C.; Samanta, S.; Mohan, D. C.; Reddy, N. N. K.; Adimurthy, S. *Synthesis* **2017**, *49*, 2513-2522.
